# Supplementary material
Source: publisher figshare collection journal article supplement (https://acs.figshare.com/ndownloader/files/11358431)

## Supporting Information

### Stereocontrolled Synthesis of 2-Deoxy-C-Glycopyranosyl

### Arenes Using Glycals and Aromatic Amines

Shengbiao Tang,<sup>†,‡</sup> Qiannan Zheng,<sup>†</sup> De-Cai Xiong,<sup>\*,†,§</sup> Shende Jiang,<sup>‡</sup> Qin Li,<sup>†</sup> and Xin-Shan Ye<sup>\*,†</sup>

<sup>†</sup>State Key Laboratory of Natural and Biomimetic Drugs, School of Pharmaceutical Sciences, Peking University, Xue Yuan Road No. 38, Beijing 100191, China

<sup>‡</sup>School of Pharmaceutical Science and Technology, Tianjin University, Tianjin 300072, China

<sup>§</sup> State key Laboratory of Drug Research, Shanghai Institute of Materia Medica, Chinese Academy of Sciences

### Table of Contents

|                                                            |           |
|------------------------------------------------------------|-----------|
| General information                                        | S2        |
| Optimization of the reaction (Tables S1-S3)                | S2 – S5   |
| Structure identification of compounds <b>7-9</b>           | S6 – S7   |
| Experimental procedures and compound characterization data | S8 – S47  |
| Reference                                                  | S47       |
| Spectral data                                              | S47 – S98 |

## 1) General information

All reagents were purchased as reagent grade and used without further purification unless otherwise indicated. The Pd-catalysts were purchased from Sigma-Aldrich company Ltd. THF (99.5+% extra pure) was purchased. Organic solutions were removed by rotary evaporation with a water bath temperature below 50 °C. Reactions were monitored by thin-layer chromatography (TLC) analysis, and stained by the solution of potassium permanganate or acidic ceric ammonium molybdate. Product purification was subjected by column chromatography on silica gel. <sup>1</sup>H NMR and <sup>13</sup>C NMR spectra were recorded on a 400 MHz spectrometer at 20 °C. The residual solvent of CDCl<sub>3</sub> (7.26 ppm for <sup>1</sup>H NMR), TMS (0 ppm for <sup>1</sup>H NMR) was used as an internal standard for <sup>1</sup>H NMR spectra, and the residual solvent of CDCl<sub>3</sub> (77.16 ppm for <sup>13</sup>C NMR) was used as an internal standard for <sup>13</sup>C NMR. Chemical shifts (δ) were recorded in ppm, coupling constants (*J*) were reported in Hz. The abbreviations are as follows: s = singlet, d = doublet, t = triplet, m = multiplet, br = broad signal. High resolution mass spectra were obtained using a Fourier transform ion cyclotron resonance mass spectrometer.

## 2) Table S1. Screening the reaction conditions<sup>ab</sup>

| 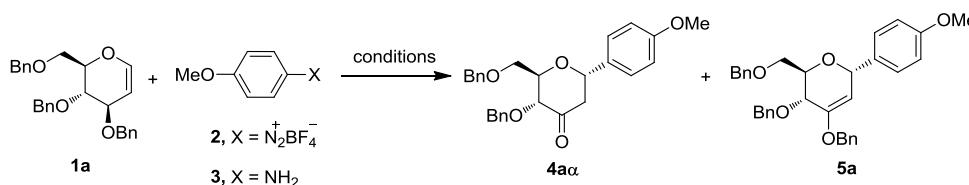 |           |         |                                    |                   |                         |        |        |
|--------------------------------------------------------------------------------------|-----------|---------|------------------------------------|-------------------|-------------------------|--------|--------|
| entry                                                                                | substrate | solvent | catalyst<br>(15%)                  | ligand<br>(20%)   | additive<br>(10 equiv.) | 4aα(%) | 5a (%) |
| 1                                                                                    | 2         | THF     | Pd(OAc) <sub>2</sub>               | -                 | -                       | 0      | trace  |
| 2                                                                                    | 2         | THF     | Pd(OAc) <sub>2</sub>               | Ph <sub>3</sub> P | -                       | 34     | 25     |
| 3                                                                                    | 2         | THF     | Pd(PPh <sub>3</sub> ) <sub>4</sub> | -                 | -                       | 36     | 31     |
| 4                                                                                    | 2         | THF     | Pd(PPh <sub>3</sub> ) <sub>4</sub> | xanphose          | -                       | 33     | 30     |

|                 |   |                    |                      |                   |                                                 |       |    |
|-----------------|---|--------------------|----------------------|-------------------|-------------------------------------------------|-------|----|
| 5               | 2 | THF                | Pd(dba) <sub>2</sub> | -                 | -                                               | 81    | 0  |
| 6               | 2 | THF                | Pd(dba) <sub>2</sub> | Ph <sub>3</sub> P | -                                               | 74    | 0  |
| 7               | 2 | THF                | Pd(dba) <sub>2</sub> | -                 | NaHCO <sub>3</sub>                              | 53    | 26 |
| 8               | 2 | THF                | Pd(dba) <sub>2</sub> | -                 | K <sub>2</sub> CO <sub>3</sub>                  | 56    | 17 |
| 9               | 2 | THF                | Pd(dba) <sub>2</sub> | -                 | K <sub>3</sub> PO <sub>4</sub>                  | 46    | 20 |
| 10              | 2 | THF                | Pd(dba) <sub>2</sub> | -                 | NaOH                                            | 0     | 21 |
| 11              | 2 | THF                | Pd(dba) <sub>2</sub> | -                 | DMAP                                            | 0     | 0  |
| 12              | 2 | THF                | Pd(dba) <sub>2</sub> | -                 | Et <sub>3</sub> N                               | 0     | 0  |
| 13              | 2 | THF                | Pd(dba) <sub>2</sub> | -                 | H <sub>2</sub> O                                | 62    | 0  |
| 14              | 2 | THF                | Pd(dba) <sub>2</sub> | -                 | AcOH                                            | 76    | 0  |
| 15              | 2 | THF                | Pd(dba) <sub>2</sub> | -                 | 2M HCl                                          | 31    | 0  |
| 16              | 2 | Acetone            | Pd(dba) <sub>2</sub> | -                 | -                                               | 31    | 0  |
| 17              | 2 | CH <sub>3</sub> CN | Pd(dba) <sub>2</sub> | -                 | -                                               | 0     | 0  |
| 18              | 2 | DMF                | Pd(dba) <sub>2</sub> | -                 | -                                               | 0     | 0  |
| 19              | 2 | DCM                | Pd(dba) <sub>2</sub> | -                 | -                                               | 0     | 0  |
| 20 <sup>c</sup> | 3 | THF                | Pd(dba) <sub>2</sub> | -                 | NaNO <sub>2</sub> +HBF <sub>4</sub>             | 0     | 0  |
| 21 <sup>c</sup> | 3 | MeOH               | Pd(dba) <sub>2</sub> | -                 | NaNO <sub>2</sub> +HBF <sub>4</sub>             | 0     | 0  |
| 22 <sup>c</sup> | 3 | THF                | Pd(dba) <sub>2</sub> | -                 | <sup>t</sup> Butyl nitrite<br>+HBF <sub>4</sub> | trace | 0  |
| 23 <sup>c</sup> | 3 | THF                | Pd(dba) <sub>2</sub> | -                 | NOBF <sub>4</sub>                               | 73    | 0  |

<sup>a</sup>The reactions of entries 1-19 were carried out with **1a** (21.0 mg, 0.05 mmol), **2** (22.0 mg, 0.1 mmol) and solvent (4 mL) at room temperature for 1 h; <sup>b</sup>Isolated yield; <sup>c</sup>The reactions of entries 20-23 were carried out in one-pot protocol: *p*-anisidine **3** (31.0 mg, 0.25 mmol), additives (0.25 mmol of each) at 0 °C for 30 min, then **1a** (42.0 mg, 0.1 mmol) and Pd(dba)<sub>2</sub> (15 mol%) were added, and then stirred at r.t. for 1 h.

### 3) Table S2. Investigation of anomerization<sup>ab</sup>

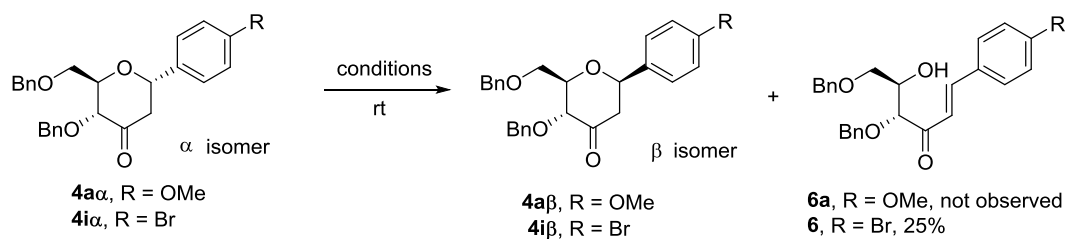

| entry | catalyst                                   | solvent                         | <b>4aβ</b> | <b>4iβ</b> |
|-------|--------------------------------------------|---------------------------------|------------|------------|
|       |                                            |                                 | R = OMe    | R = Br     |
|       |                                            |                                 | yield (%)  | yield (%)  |
| 1     | HBF <sub>4</sub> , 12.5 μL                 | Et <sub>2</sub> O               | 0          | 0          |
| 2     | HBF <sub>4</sub> , 25 μL                   | Et <sub>2</sub> O               | trace      | 0          |
| 3     | HBF <sub>4</sub> , 50 μL                   | Et <sub>2</sub> O               | 92         | 32         |
| 4     | HBF <sub>4</sub> , 75 μL                   | Et <sub>2</sub> O               | 86         | 51         |
| 5     | HBF <sub>4</sub> , 100 μL                  | Et <sub>2</sub> O               | 78         | 46         |
| 6     | BF <sub>3</sub> ·Et <sub>2</sub> O, 100 μL | Et <sub>2</sub> O               | 23         | 0          |
| 7     | SnCl <sub>4</sub> , 100 μL                 | Et <sub>2</sub> O               | 45         | 0          |
| 8     | con. HCl, 100 μL                           | Et <sub>2</sub> O               | 0          | 0          |
| 9     | HBF <sub>4</sub> , 50 μL                   | isopropyl ether                 | 82         | 50         |
| 10    | HBF <sub>4</sub> , 50 μL                   | <sup>n</sup> Bu <sub>2</sub> O  | 65         | trace      |
| 11    | HBF <sub>4</sub> , 50 μL                   | glycol dimethyl ether           | 0          | 0          |
| 12    | HBF <sub>4</sub> , 50 μL                   | methyl <sup>t</sup> butyl ether | 0          | 0          |
| 13    | HBF <sub>4</sub> , 50 μL                   | dichloromethane                 | 0          | 0          |
| 14    | HBF <sub>4</sub> , 50 μL                   | ethyl acetate                   | 86         | 0          |
| 15    | HBF <sub>4</sub> , 50 μL                   | CH <sub>3</sub> CN              | trace      | 0          |
| 16    | HBF <sub>4</sub> , 50 μL                   | acetone                         | 85         | 0          |
| 17    | HBF <sub>4</sub> , 50 μL                   | DMF                             | 0          | 0          |
| 18    | HBF <sub>4</sub> , 50 μL                   | dichloroethene                  | 0          | 0          |
| 19    | HBF <sub>4</sub> , 50 μL                   | octane                          | 0          | 0          |



|    |                               |         |    |       |
|----|-------------------------------|---------|----|-------|
| 20 | HBF <sub>4</sub> , 50 $\mu$ L | THF     | 50 | trace |
| 21 | HBF <sub>4</sub> , 50 $\mu$ L | toluene | 22 | 0     |
| 22 | HBF <sub>4</sub> , 50 $\mu$ L | MeOH    | 0  | 0     |

<sup>a</sup>All reactions were carried out with **4a $\alpha$**  (10.0 mg), HBF<sub>4</sub> (50% V/V in Et<sub>2</sub>O) in solvent (1 mL) at room temperature for 1 h; **4i $\alpha$**  (10.0 mg), HBF<sub>4</sub> (50% V/V in Et<sub>2</sub>O) in solvent (1 mL) at room temperature for 5 h. <sup>b</sup> Isolated yield.

#### 4) Table S3. Reduction and reductive-amination of the compound **4f $\beta$**

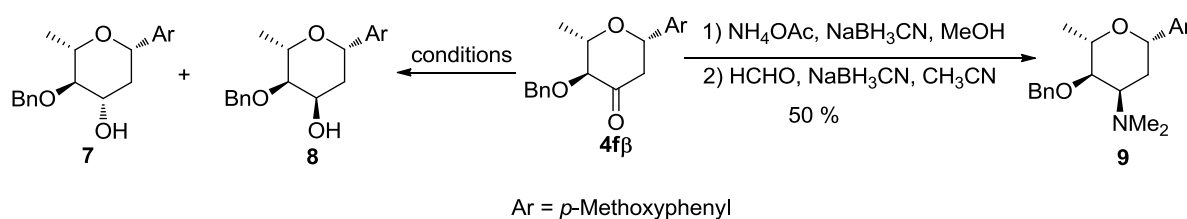

| entry | conditions                                      | <b>7</b> (%) | <b>8</b> (%) |
|-------|-------------------------------------------------|--------------|--------------|
| 1     | NaBH <sub>4</sub> , THF, rt, 1 h                | 42           | 40           |
| 2     | LiBH <sub>4</sub> , THF, rt, 1h                 | 40           | 41           |
| 3     | LiBHET <sub>3</sub> , 0 °C, 24 h                | trace        | 78           |
| 4     | Pd/C (10%), rt, 24 h                            | 10           | 73           |
| 5     | NaBHAc <sub>3</sub> , MeOH, 24 h                | 0            | 0            |
| 6     | NaBHAc <sub>3</sub> , MeCN/AcOH = 2/1, rt, 24 h | 45           | 36           |
| 7     | LiAlH <sub>4</sub> , THF, 0 °C, 1 h             | 20           | 25           |

### 5) Scheme S1. Plausible mechanism of the arylation

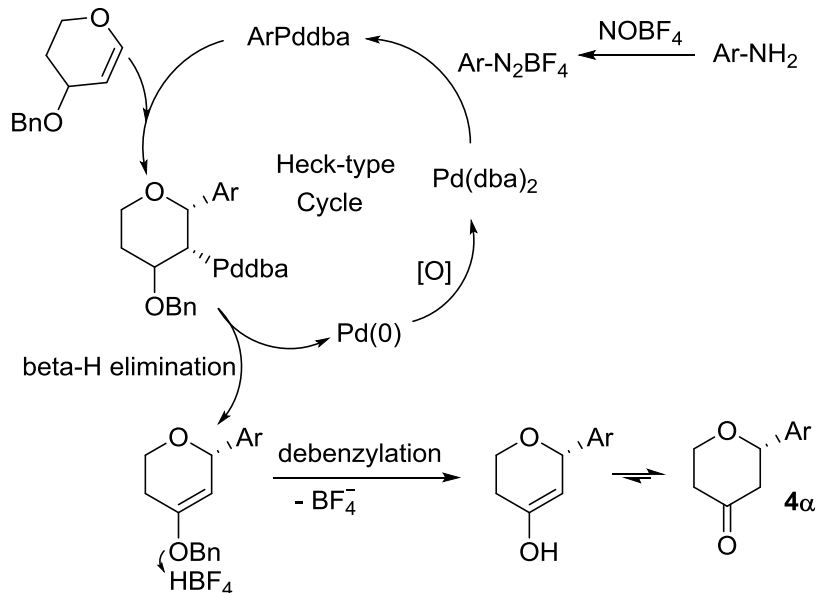

### 6) Scheme S2. NMR analyses of compounds 7-9.

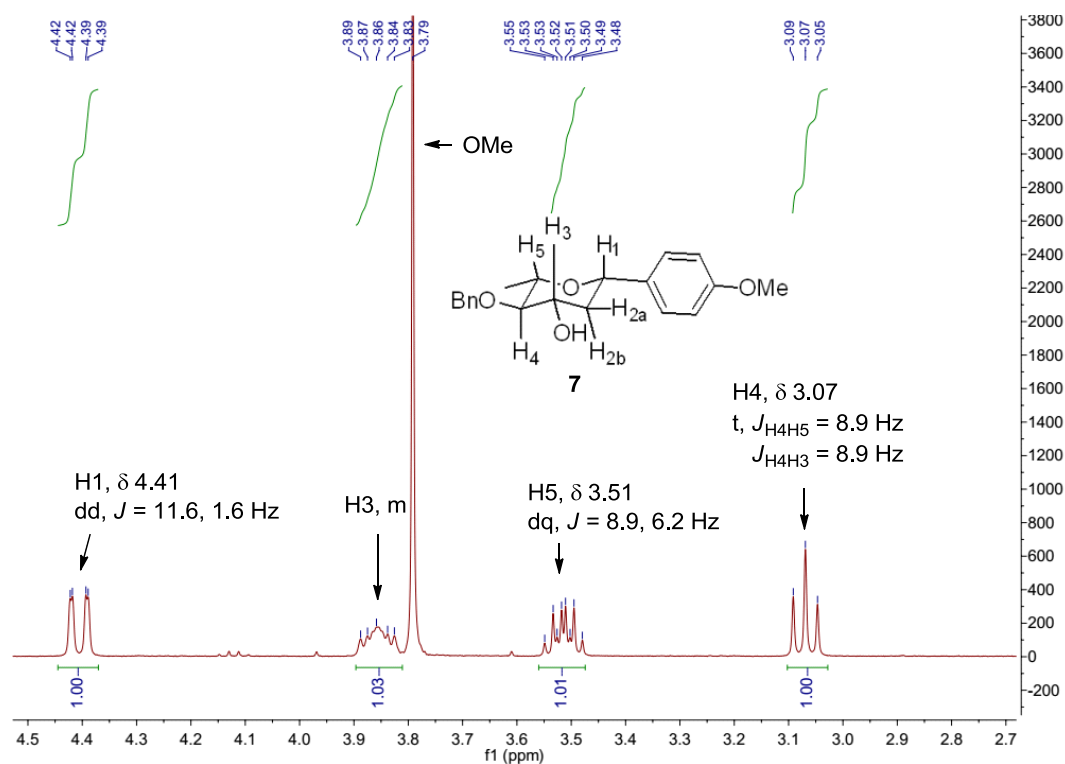

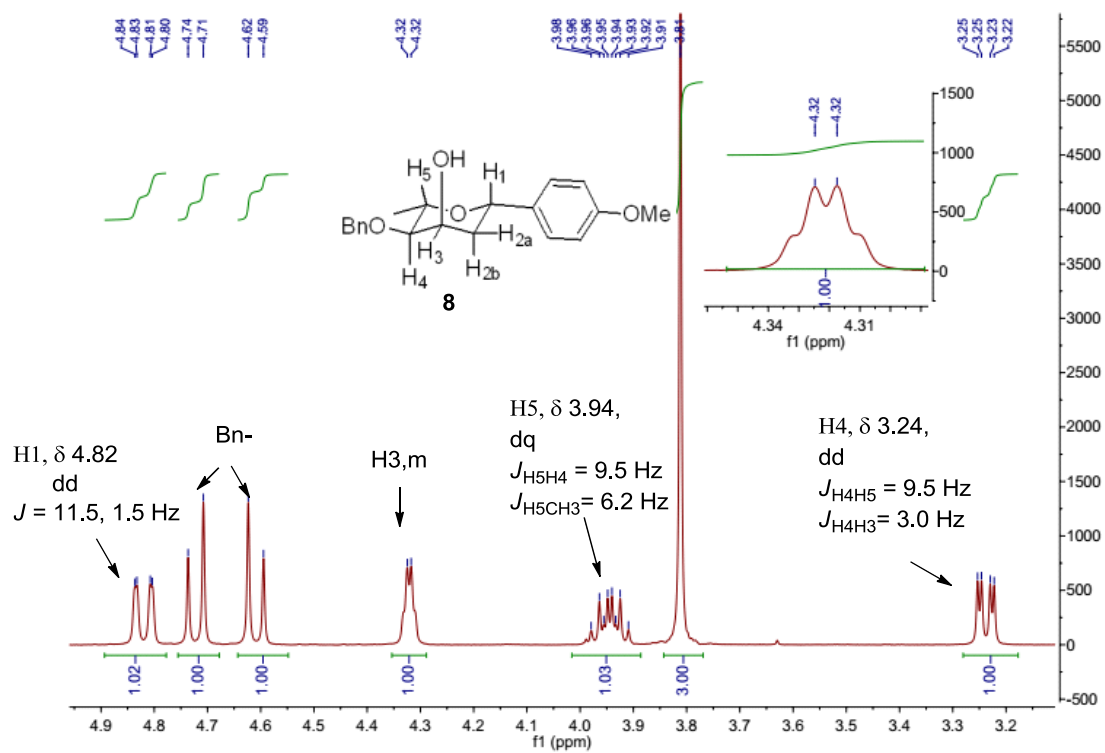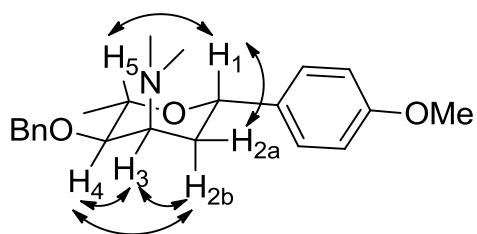

NOE analysis of the compound **9**

## 7) Experimental procedures and compound characterization data

### Procedure A: The preparation of **4aα** from glucal **1a** and **2**:

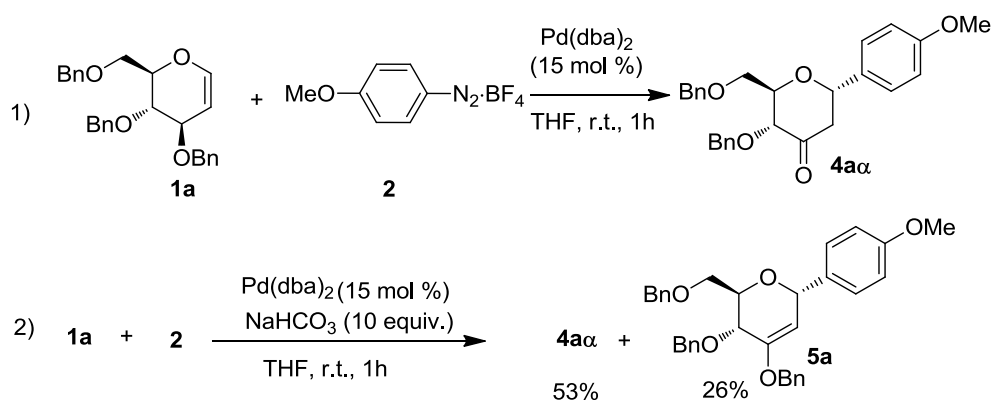

To a solution of 4-methoxybenzenediazonium tetrafluoroborate (**2**) (22.0 mg, 0.1 mmol) in tetrahydrofuran (4 mL) were added the glucal **1a** (21.0 mg, 0.05 mmol) and bis(dibenzylideneacetone)palladium (4.5 mg, 15 mol%) at room temperature, and the mixture was stirred for 1 h. After the completion of the reaction, the mixture was diluted with saturated sodium bicarbonate solution (sat. NaHCO<sub>3</sub>, 20 mL) and the aqueous layer was extracted with ethyl acetate (20 mL \* 3). The combined organic layer was dried over Na<sub>2</sub>SO<sub>4</sub>. The solvent was evaporated to dryness. The residue was purified by column chromatography on silica gel (ethyl acetate/petroleum ether: 1/10) to afford **4aα** as a white foam (18.0 mg, 81%). *R<sub>f</sub>* = 0.23 (ethyl acetate/petroleum ether: 1/6);  $[\alpha]_D^{21} = +120.8$  (c 1.4, CHCl<sub>3</sub>); <sup>1</sup>H NMR (400 MHz, CDCl<sub>3</sub>) δ 7.34 – 7.25 (m, 12H), 6.85 (d, *J* = 8.7 Hz, 2H), 5.44 (dd, *J* = 6.2, 2.6 Hz, 1H), 4.85 (d, *J* = 11.1 Hz, 1H), 4.59 (d, *J* = 12.1 Hz, 1H), 4.47 (d, *J* = 12.1 Hz, 1H), 4.42 (d, *J* = 11.1 Hz, 1H), 4.23 (d, *J* = 8.3 Hz, 1H), 3.77 (s, 3H), 3.71 – 3.61 (m, 3H), 3.09 (dd, *J* = 14.6, 2.9 Hz, 1H), 3.03 (dd, *J* = 14.7, 6.6 Hz, 1H); <sup>13</sup>C NMR (100 MHz, CDCl<sub>3</sub>) δ 206.86, 159.57, 138.06, 137.59, 130.80, 129.02, 128.53, 128.50, 128.35, 128.05, 127.99, 127.87, 114.19, 79.87, 75.02, 74.39, 73.71, 73.62, 69.28, 55.43, 44.24; HMRS (ESI) calcd for C<sub>27</sub>H<sub>29</sub>O<sub>5</sub> [M + H]<sup>+</sup> 433.2010, found 433.2007.

### 1-Methoxy-4-(3,4,6-tri-*O*-benzyl-2-deoxy-2,3-didehydro-α-D-glucopyranosyl) benzene (**5a**):

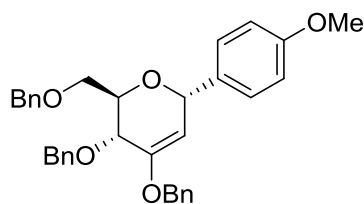

Colorless oil (6.8 mg, 26%),  $R_f = 0.31$  (ethyl acetate/petroleum ether: 1/6);  $[\alpha]_D^{26} = +34.9$  (c 0.04,  $\text{CHCl}_3$ );  $^1\text{H}$  NMR (400 MHz,  $\text{CDCl}_3$ )  $\delta$  7.42 – 7.24 (m, 17H), 6.84 (d,  $J = 8.5$  Hz, 2H), 5.33 (d,  $J = 2.7$  Hz, 1H, H-1), 5.00 (d,  $J = 3.4$  Hz, 1H, H-2), 4.94 – 4.79 (m, 3H, Bn), 4.56 (d,  $J = 11.3$  Hz, 1H, Bn), 4.54 (d,  $J = 11.3$  Hz, 1H, Bn), 4.42 (d,  $J = 12.2$  Hz, 1H, Bn), 4.21 (d,  $J = 6.5$  Hz, 1H, H-4), 3.90 – 3.84 (m, 1H, H-5), 3.79 (s, 3H, -OMe), 3.65 (dd,  $J = 10.4, 4.6$  Hz, 1H, H-6a), 3.53 (dd,  $J = 10.4, 3.5$  Hz, 1H, H-6b);  $^{13}\text{C}$  NMR (100 MHz,  $\text{CDCl}_3$ )  $\delta$  159.53, 153.44, 138.64, 138.35, 137.06, 133.06, 129.70, 128.63, 128.45, 128.38, 128.34, 128.00, 127.97, 127.73, 127.71, 127.53, 113.75, 99.28, 73.66, 73.44, 73.36, 72.21, 71.64, 69.29, 69.10, 55.43; HMRS (ESI) calcd for  $\text{C}_{34}\text{H}_{35}\text{O}_5$   $[\text{M} + \text{H}]^+$  523.2484, found 523.2484.

#### Procedure B: The preparation of 4(a-u) $\alpha$ and 4(a-u) $\beta$

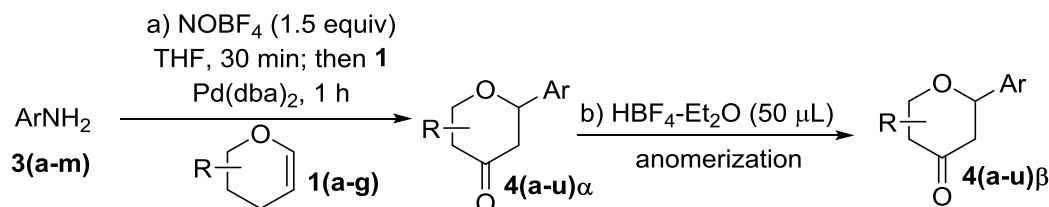

#### (2R,3R,6S)-3-Benzyloxy-2-benzyloxymethyl-6-(4-methoxyphenyl)-tetrahydro-4H-pyran-4-one (4aa):

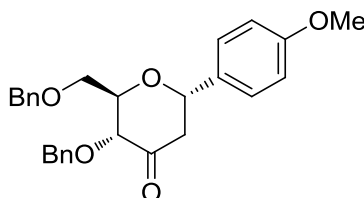

To a solution of *p*-anisidine (**3**) (31.0 mg, 0.25 mmol) in tetrahydrofuran (THF) (4 mL) were added nitrosonium tetrafluoroborate (44.0 mg, 0.38 mmol) at  $-40$  °C under argon. Then, the acetonitrile-dry ice bath was removed and the mixture was stirred at

room temperature for 30 min, during this period, a large amount of solid suspension was observed. Then the glucal **1a** (42.0 mg, 0.1 mmol) and bis(dibenzylideneacetone)palladium (Pd(dba)<sub>2</sub>) (8.7 mg, 0.015 mmol) were added to the reaction mixture, and the mixture was stirred at room temperature for 1 h. After the completion of the reaction, the mixture was diluted with saturated sodium bicarbonate solution (sat. NaHCO<sub>3</sub>, 20 mL) and the aqueous layer was extracted with ethyl acetate (20 mL \* 3). The combined organic layer was dried over Na<sub>2</sub>SO<sub>4</sub>. The solvent was evaporated to dryness. The residue was purified by column chromatography on silica gel (ethyl acetate/petroleum ether: 1/10) to afford **4aa** as a white foam (31.9 mg, 73%).  $R_f = 0.23$  (ethyl acetate/petroleum ether: 1/6);  $[\alpha]_D^{21} = +120.8$  (c 1.4, CHCl<sub>3</sub>); <sup>1</sup>H NMR (400 MHz, CDCl<sub>3</sub>)  $\delta$  7.34 – 7.25 (m, 12H), 6.85 (d,  $J = 8.7$  Hz, 2H), 5.44 (dd,  $J = 6.2$ , 2.6 Hz, 1H, H-1, <sup>4</sup>C<sub>1</sub> (D,  $\alpha$ )), 4.85 (d,  $J = 11.1$  Hz, 1H), 4.59 (d,  $J = 12.1$  Hz, 1H), 4.47 (d,  $J = 12.1$  Hz, 1H), 4.42 (d,  $J = 11.1$  Hz, 1H), 4.23 (d,  $J = 8.3$  Hz, 1H), 3.77 (s, 3H), 3.71 – 3.61 (m, 3H), 3.09 (dd,  $J = 14.6$ , 2.9 Hz, 1H), 3.03 (dd,  $J = 14.7$ , 6.6 Hz, 1H); <sup>13</sup>C NMR (100 MHz, CDCl<sub>3</sub>)  $\delta$  206.86, 159.57, 138.06, 137.59, 130.80, 129.02, 128.53, 128.50, 128.35, 128.05, 127.99, 127.87, 114.19, 79.87, 75.02, 74.39, 73.71, 73.62, 69.28, 55.43, 44.24; HMRS (ESI) calcd for C<sub>27</sub>H<sub>29</sub>O<sub>5</sub> [M + H]<sup>+</sup> 433.2010, found 433.2007.

**(2R,3R,6S)-3-Methoxy-2-methoxymethyl-6-(4-methoxyphenyl)-tetrahydro-4H-pyran-4-one (4ba):**

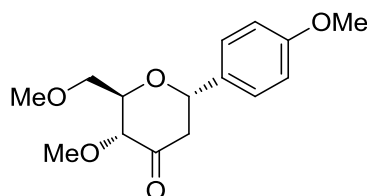

To a solution of *p*-anisidine (**3**) (31.0 mg, 0.25 mmol) in tetrahydrofuran (THF) (4 mL) were added nitrosonium tetrafluoroborate (44.0 mg, 0.38 mmol) at -40 °C under argon. Then, the acetonitrile-dry ice bath was removed and the mixture was stirred at room temperature for 30 min, during this period, a large amount of solid suspension

was observed. Then the glucal **1b** (19.0 mg, 0.1 mmol) and bis(dibenzylideneacetone)palladium (Pd(dba)<sub>2</sub>) (8.7 mg, 0.015 mmol) were added to the reaction mixture, and the mixture was stirred at room temperature for 1 h. After the completion of the reaction, the mixture was diluted with saturated sodium bicarbonate solution (sat. NaHCO<sub>3</sub>, 20 mL) and the aqueous layer was extracted with ethyl acetate (20 mL \* 3). The combined organic layer was dried over Na<sub>2</sub>SO<sub>4</sub>. The solvent was evaporated to dryness. The residue was purified by column chromatography on silica gel (ethyl acetate/petroleum ether: 1/3) to afford **4ba** as a white foam (18.5 mg, 65%).  $R_f$  = 0.24 (ethyl acetate/petroleum ether: 1/3);  $[\alpha]_D^{17}$  = +128.8 (c 0.4, CHCl<sub>3</sub>); <sup>1</sup>H NMR (400 MHz, CDCl<sub>3</sub>)  $\delta$  7.30 – 7.27 (m, 2H), 6.85(d,  $J$  = 8.6 Hz, 2H), 5.42 (dd,  $J$  = 6.2, 2.6 Hz, 1H, H-1, <sup>4</sup>C<sub>1</sub> (D,  $\alpha$ )), 3.94 (d,  $J$  = 8.8 Hz, 1H), 3.78 (s, 3H), 3.62 – 3.54 (m, 3H), 3.50 (s, 3H), 3.42 (s, 3H), 3.07 (dd,  $J$  = 14.6, 2.8 Hz, 1H), 3.01 (dd,  $J$  = 14.8, 6.8 Hz, 1H); <sup>13</sup>C NMR (100 MHz, CDCl<sub>3</sub>)  $\delta$  206.89, 159.57, 130.69, 129.03, 114.17, 81.97, 75.05, 74.16, 71.74, 59.67, 59.52, 55.39, 44.07; HMRS (ESI) calcd for C<sub>15</sub>H<sub>21</sub>O<sub>5</sub> [M + H]<sup>+</sup> 281.1384, found 281.1376.

**(2R,3R,6S)-3-*tert*-Butyldimethylsilyloxy-2-butyldimethylsilyloxymethyl-6-(4-methoxyphenyl)-tetrahydro-4H-pyran-4-one (4ca):**

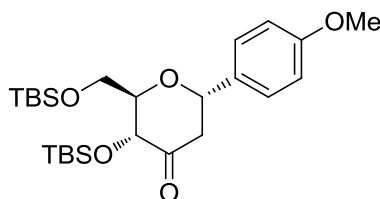

To a solution of *p*-anisidine (**3**) (31.0 mg, 0.25 mmol) in tetrahydrofuran (THF) (4 mL) were added nitrosonium tetrafluoroborate (44.0 mg, 0.38 mmol) at -40 °C under argon. Then, the acetonitrile-dry ice bath was removed and the mixture was stirred at room temperature for 30 min, during this period, a large amount of solid suspension was observed. Then the glucal **1c** (49.0 mg, 0.1 mmol) and bis(dibenzylideneacetone)palladium (Pd(dba)<sub>2</sub>) (8.7 mg, 0.015 mmol) were added to the reaction mixture, and the mixture was stirred at room temperature for 1 h. After the completion of the reaction, the mixture was diluted with saturated sodium bicarbonate

solution (sat. NaHCO<sub>3</sub>, 20 mL) and the aqueous layer was extracted with ethyl acetate (20 mL \* 3). The combined organic layer was dried over Na<sub>2</sub>SO<sub>4</sub>. The solvent was evaporated to dryness. The residue was purified by column chromatography on silica gel (ethyl acetate/petroleum ether: 1/20) to afford **4ca** as a colorless oil (30.3 mg, 63%). *R*<sub>f</sub> = 0.33 (ethyl acetate/petroleum ether: 1/20); [*a*]<sub>D</sub><sup>17</sup> = +68.3 (c 0.2, CHCl<sub>3</sub>); <sup>1</sup>H NMR (400 MHz, CDCl<sub>3</sub>) δ 7.29 (d, *J* = 8.7 Hz, 2H), 6.86 (d, *J* = 8.7 Hz, 2H), 5.39 (dd, *J* = 6.8, 2.7 Hz, 1H, H-1, <sup>4</sup>C<sub>1</sub> (D, α)), 4.30 (d, *J* = 9.0 Hz, 1H), 3.88 – 3.75 (m, 2H), 3.79 (s, 3H), 3.50 – 3.45 (m, 1H), 3.05 (dd, *J* = 14.7, 2.8 Hz, 1H), 2.92 (dd, *J* = 14.6, 6.9 Hz, 1H), 0.91 (s, 9H), 0.88 (s, 9H), 0.14 (s, 3H), 0.08 (s, 3H), 0.07 (s, 3H), 0.03 (s, 3H); <sup>13</sup>C NMR (100 MHz, CDCl<sub>3</sub>) δ 206.82, 159.36, 131.34, 128.81, 114.09, 75.13, 74.62, 63.32, 55.41, 43.83, 26.07, 25.94, 18.57, 18.54, -4.12, -4.90, -5.20, -5.42; HMRS (ESI) calcd for C<sub>25</sub>H<sub>45</sub>O<sub>5</sub>Si<sub>2</sub> [M + H]<sup>+</sup> 481.2801, found 481.2795.

**(2R,3S,6S)-3-Benzyloxy-2-benzyloxymethyl-6-(4-methoxyphenyl)-tetrahydro-4H-pyran-4-one (4da):**

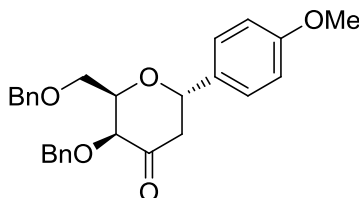

To a solution of *p*-anisidine (**3**) (31.0 mg, 0.25 mmol) in tetrahydrofuran (THF) (4 mL) were added nitrosonium tetrafluoroborate (44.0 mg, 0.38 mmol) at -40 °C under argon. Then, the acetonitrile-dry ice bath was removed and the mixture was stirred at room temperature for 30 min, during this period, a large amount of solid suspension was observed. Then the galactal **1d** (42.0 mg, 0.1 mmol) and bis(dibenzylideneacetone)palladium (Pd(dba)<sub>2</sub>) (8.7 mg, 0.015 mmol) were added to the reaction mixture, and the mixture was stirred at room temperature for 1 h. After the completion of the reaction, the mixture was diluted with saturated sodium bicarbonate solution (sat. NaHCO<sub>3</sub>, 20 mL) and the aqueous layer was extracted with ethyl acetate (20 mL \* 3). The combined organic layer was dried over Na<sub>2</sub>SO<sub>4</sub>. The solvent was evaporated to dryness. The residue was purified by column chromatography on silica



gel (ethyl acetate/petroleum ether: 1/10) to afford **4da** as a yellow foam (25.0 mg, 57%).  $R_f = 0.34$  (ethyl acetate/petroleum ether: 1/6);  $[\alpha]_D^{19} = +39.5$  (c 0.3, CHCl<sub>3</sub>); <sup>1</sup>H NMR (400 MHz, CDCl<sub>3</sub>)  $\delta$  7.36 – 7.25 (m, 12H), 6.88 (d,  $J = 8.7$  Hz, 2H), 5.27 (dd,  $J = 9.5$ , 3.6 Hz, 1H, H-1), <sup>1</sup>C<sub>4</sub> (D,  $\alpha$ ), 4.93 (d,  $J = 12.1$  Hz, 1H), 4.57 (d,  $J = 12.5$  Hz, 2H), 4.50 (d,  $J = 12.2$  Hz, 1H), 4.43 – 4.37 (m, 1H), 4.15 (d,  $J = 6.4$  Hz, 1H), 3.86 – 3.76 (m, 2H), 3.80 (s, 3H), 2.80 (dd,  $J = 14.4$ , 3.7 Hz, 1H), 2.66 (dd,  $J = 14.1$ , 9.8 Hz, 1H); <sup>13</sup>C NMR (100 MHz, CDCl<sub>3</sub>)  $\delta$  204.60, 159.53, 138.10, 137.60, 132.70, 128.65, 128.49, 128.12, 127.98, 127.81, 127.75, 127.60, 114.08, 79.45, 76.36, 74.68, 73.70, 72.78, 68.58, 55.44, 47.86; HMRS (ESI) calcd for C<sub>27</sub>H<sub>29</sub>O<sub>5</sub> [M + H]<sup>+</sup> 433.2010, found 433.2008.

**(2R,3R,6S)-3-Benzyloxy-2-methyl-6-(4-methoxyphenyl)-tetrahydro-4H-pyran-4-one (4ea):**

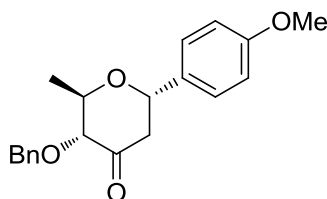

To a solution of *p*-anisidine (**3**) (31.0 mg, 0.25 mmol) in tetrahydrofuran (THF) (4 mL) were added nitrosonium tetrafluoroborate (44.0 mg, 0.38 mmol) at -40 °C under argon. Then, the acetonitrile-dry ice bath was removed and the mixture was stirred at room temperature for 30 min, during this period, a large amount of solid suspension was observed. Then the 6-deoxy-glucal **1e** (31.0 mg, 0.1 mmol) and bis(dibenzylideneacetone)palladium (Pd(dba)<sub>2</sub>) (8.7 mg, 0.015 mmol) were added to the reaction mixture, and the mixture was stirred at room temperature for 1 h. After the completion of the reaction, the mixture was diluted with saturated sodium bicarbonate solution (sat. NaHCO<sub>3</sub>, 20 mL) and the aqueous layer was extracted with ethyl acetate (20 mL \* 3). The combined organic layer was dried over Na<sub>2</sub>SO<sub>4</sub>. The solvent was evaporated to dryness. The residue was purified by column chromatography on silica gel (ethyl acetate/petroleum ether: 1/10) to afford **4ea** as a white foam (25.5 mg, 78%).  $R_f = 0.35$  (ethyl acetate/petroleum ether: 1/6);  $[\alpha]_D^{19} = +102.8$  (c 0.4, CHCl<sub>3</sub>); <sup>1</sup>H NMR

(400 MHz, CDCl<sub>3</sub>)  $\delta$  7.35 – 7.28 (m, 7H), 6.86 (d,  $J$  = 8.7 Hz, 2H), 5.27 (dd,  $J$  = 6.4, 2.9 Hz, 1H, H-1,  $^4C_1$  (D,  $\alpha$ )), 4.87 (d,  $J$  = 11.5 Hz, 1H), 4.49 (d,  $J$  = 11.5 Hz, 1H), 3.79 (s, 3H), 3.82 – 3.72 (m, 1H), 3.66 (d,  $J$  = 7.9 Hz, 1H), 3.11 (dd,  $J$  = 14.2, 3.1 Hz, 1H), 2.93 (dd,  $J$  = 13.9, 6.6 Hz, 1H), 1.28 (d,  $J$  = 6.2 Hz, 3H);  $^{13}C$  NMR (100 MHz, CDCl<sub>3</sub>)  $\delta$  206.77, 159.52, 137.53, 131.32, 128.79, 128.57, 128.37, 128.12, 114.16, 85.03, 74.56, 73.25, 71.65, 55.44, 44.75, 18.38; HMRS (ESI) calcd for C<sub>20</sub>H<sub>23</sub>O<sub>4</sub> [M + H]<sup>+</sup> 327.1591, found 327.1592.

**(2S,3S,6R)-3-Benzyloxy-2-methyl-6-(4-methoxyphenyl)-tetrahydro-4H-pyran-4-one (4fa).**

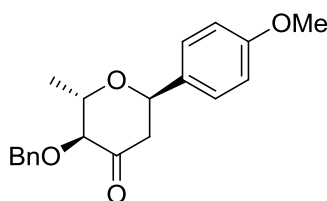

To a solution of *p*-anisidine (**3**) (31.0 mg, 0.25 mmol) in tetrahydrofuran (THF) (4 mL) were added nitrosonium tetrafluoroborate (44.0 mg, 0.38 mmol) at -40 °C under argon. Then, the acetonitrile-dry ice bath was removed and the mixture was stirred at room temperature for 30 min, during this period, a large amount of solid suspension was observed. Then the rhamnal **1f** (31.0 mg, 0.1 mmol) and bis(dibenzylideneacetone)palladium (Pd(dba)<sub>2</sub>) (8.7 mg, 0.015 mmol) were added to the reaction mixture, and the mixture was stirred at room temperature for 1 h. After the completion of the reaction, the mixture was diluted with saturated sodium bicarbonate solution (sat. NaHCO<sub>3</sub>, 20 mL) and the aqueous layer was extracted with ethyl acetate (20 mL \* 3). The combined organic layer was dried over Na<sub>2</sub>SO<sub>4</sub>. The solvent was evaporated to dryness. The residue was purified by column chromatography on silica gel (ethyl acetate/petroleum ether: 1/10) to afford **4fa** as a light yellow foam (23.0 mg, 70%).  $R_f$  = 0.36 (ethyl acetate/petroleum ether: 1/6);  $[\alpha]_D^{20}$  = -141.2 (c 1.1, CHCl<sub>3</sub>);  $^1H$  NMR (400 MHz, CDCl<sub>3</sub>)  $\delta$  7.36 – 7.28 (m, 7H), 6.88 – 6.84 (m, 2H), 5.27 (dd,  $J$  = 6.7, 3.3 Hz, 1H, H-1,  $^1C_4$  (L,  $\alpha$ )), 4.87 (d,  $J$  = 11.5 Hz, 1H), 4.50 (d,  $J$  = 11.5 Hz, 1H), 3.79 (s, 3H), 3.81 – 3.73 (m, 1H), 3.66 (dd,  $J$  = 8.0, 0.9 Hz, 1H), 3.11 (dd,  $J$  = 14.2, 3.3 Hz,

1H), 2.93 (ddd,  $J = 14.2, 6.7, 1.0$  Hz, 1H), 1.28 (d,  $J = 6.4$ , 3H);  $^{13}\text{C}$  NMR (100 MHz,  $\text{CDCl}_3$ )  $\delta$  206.80, 159.52, 137.52, 131.31, 128.80, 128.57, 128.38, 128.13, 114.15, 85.03, 74.56, 73.26, 71.64, 55.44, 44.74, 18.38; HMRS (ESI) calcd for  $\text{C}_{20}\text{H}_{23}\text{O}_4$  [ $\text{M} + \text{H}$ ] $^+$  327.1586, found 327.1586.

**(3S,6R)-3-Benzyloxy-6-(4-methoxyphenyl)-tetrahydro-4H-pyran-4-one (4g $\beta$ ).**

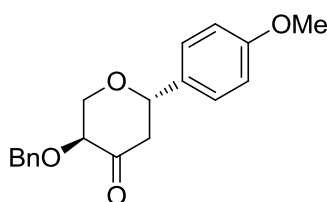

To a solution of *p*-anisidine (**3**) (31.0 mg, 0.25 mmol) in tetrahydrofuran (THF) (4 mL) were added nitrosonium tetrafluoroborate (44.0 mg, 0.38 mmol) at  $-40\text{ }^\circ\text{C}$  under argon. Then, the acetonitrile-dry ice bath was removed and the mixture was stirred at room temperature for 30 min, during this period, a large amount of solid suspension was observed. Then the arabinal **1g** (30.0 mg, 0.1 mmol) and bis(dibenzylideneacetone)palladium ( $\text{Pd}(\text{dba})_2$ ) (8.7 mg, 0.015 mmol) were added to the reaction mixture, and the mixture was stirred at room temperature for 1 h. After the completion of the reaction, the mixture was diluted with saturated sodium bicarbonate solution (sat.  $\text{NaHCO}_3$ , 20 mL) and the aqueous layer was extracted with ethyl acetate (20 mL \* 3). The combined organic layer was dried over  $\text{Na}_2\text{SO}_4$ . The solvent was evaporated to dryness. The residue was purified by column chromatography on silica gel (ethyl acetate/petroleum ether: 1/10) to afford **4g $\beta$**  as a white foam (17.3 mg, 55%).  $R_f = 0.43$  (ethyl acetate/petroleum ether: 1/6);  $[\alpha]_D^{20} = -98.2$  (c 0.5,  $\text{CHCl}_3$ );  $^1\text{H}$  NMR (400 MHz,  $\text{CDCl}_3$ )  $\delta$  7.41 – 7.25 (m, 7H), 6.91 – 6.87 (m, 2H), 4.95 (d,  $J = 11.9$  Hz, 1H, Bn-), 4.60 (d,  $J = 12.0$  Hz, 1H, Bn-), 4.60 – 4.57 (m, 1H, H-1), 4.40 (dd,  $J = 10.9, 7.2$  Hz, 1H, H-5a), 4.19 (dd,  $J = 10.4, 7.3$  Hz, 1H, H-5b), 3.80 (s, 3H), 3.62 (t,  $J = 10.7$  Hz, 1H, H-4), 2.76 – 2.66 (m, 2H, H-2a, 2b);  $^{13}\text{C}$  NMR (100 MHz,  $\text{CDCl}_3$ )  $\delta$  205.15, 159.77, 137.57, 132.18, 128.75, 128.27, 128.15, 127.18, 114.23, 80.65, 79.16,

72.94, 70.72, 55.47, 49.90; HMRS (ESI) calcd for C<sub>19</sub>H<sub>20</sub>O<sub>4</sub>Na [M + Na]<sup>+</sup> 335.1254, found 335.1256.

**(2R,3R,6S)-3-Benzyloxy-2-benzyloxymethyl-6-phenyl-tetrahydro-4H-pyran-4-one (4ha):**

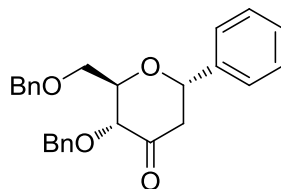

To a solution of aniline (**3b**) (23.0 mg, 0.25 mmol) in tetrahydrofuran (THF) (4 mL) were added nitrosonium tetrafluoroborate (44.0 mg, 0.38 mmol) at -40 °C under argon. Then, the acetonitrile-dry ice bath was removed and the mixture was stirred at room temperature for 30 min, during this period, a large amount of solid suspension was observed. Then the glucal **1a** (42.0 mg, 0.1 mmol) and bis(dibenzylideneacetone)palladium (Pd(dba)<sub>2</sub>) (8.7 mg, 0.015 mmol) were added to the reaction mixture, and the mixture was stirred at room temperature for 1 h. After the completion of the reaction, the mixture was diluted with saturated sodium bicarbonate solution (sat.NaHCO<sub>3</sub>, 20 mL) and the aqueous layer was extracted with ethyl acetate (20 mL \* 3). The combined organic layer was dried over Na<sub>2</sub>SO<sub>4</sub>. The solvent was evaporated to dryness. The residue was purified by column chromatography on silica gel (ethyl acetate/petroleum ether: 1/10) to afford **4ha** as a white foam (30.5 mg, 76%). *R*<sub>f</sub> = 0.29 (ethyl acetate/petroleum ether: 1/6); [*α*]<sub>D</sub><sup>19</sup> = +85.3 (c 0.2, CHCl<sub>3</sub>); <sup>1</sup>H NMR (400 MHz, CDCl<sub>3</sub>) δ 7.40 – 7.25 (m, 15H), 5.48 (dd, *J* = 6.6, 3.1 Hz, 1H, H-1, <sup>4</sup>C<sub>1</sub> (D, α)), 4.84 (d, *J* = 11.1 Hz, 1H), 4.59 (d, *J* = 12.1 Hz, 1H), 4.48 (d, *J* = 12.1 Hz, 1H), 4.43 (d, *J* = 11.1 Hz, 1H), 4.24 (d, *J* = 8.6 Hz, 1H), 3.76 – 3.68 (m, 2H), 3.65 (dd, *J* = 10.4, 2.2 Hz, 1H), 3.12 (dd, *J* = 14.7, 3.2 Hz, 1H), 3.03 (dd, *J* = 14.7, 6.7 Hz, 1H); <sup>13</sup>C NMR (100 MHz, CDCl<sub>3</sub>) δ 206.55, 138.78, 138.04, 137.54, 128.87, 128.54, 128.52, 128.36, 128.32, 128.08, 127.99, 127.89, 127.54, 79.78, 75.35, 74.85, 73.72, 73.58, 69.33, 44.15. The <sup>1</sup>H/<sup>13</sup>C NMR spectroscopic data coincide with the previous report.<sup>[1]</sup>

**(2R,3R,6S)-3-Benzyloxy-2-benzyloxymethyl-6-(4-bromophenyl)-tetrahydro-4H-pyran-4-one (4ia):**

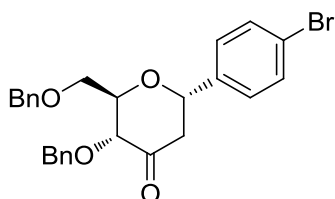

To a solution of *p*-bromoaniline (**3c**) (43.0 mg, 0.25 mmol) in tetrahydrofuran (THF) (4 mL) were added nitrosonium tetrafluoroborate (44.0 mg, 0.38 mmol) at -40 °C under argon. Then, the acetonitrile-dry ice bath was removed and the mixture was stirred at room temperature for 0.5 h, during this period, a large amount of solid suspension was observed. Then the glucal **1a** (42.0 mg, 0.1 mmol) and bis(dibenzylideneacetone)palladium (Pd(dba)<sub>2</sub>) (8.7 mg, 0.015 mmol) were added to the reaction mixture, and the mixture was stirred at room temperature for 1 h. After the completion of the reaction, the mixture was diluted with saturated sodium bicarbonate solution (sat. NaHCO<sub>3</sub>, 20 mL) and the aqueous layer was extracted with ethyl acetate (20 mL \* 3). The combined organic layer was dried over Na<sub>2</sub>SO<sub>4</sub>. The solvent was evaporated to dryness. The residue was purified by column chromatography on silica gel (ethyl acetate/petroleum ether: 1/10) to afford **4ia** as a white foam (37.5 mg, 78%). *R*<sub>f</sub> = 0.30 (ethyl acetate/petroleum ether: 1/6); [*α*]<sub>D</sub><sup>19</sup> = +104.5 (c 0.2, CHCl<sub>3</sub>); <sup>1</sup>H NMR (400 MHz, CDCl<sub>3</sub>) δ 7.46 (d, *J* = 8.4 Hz, 2H), 7.35 – 7.24 (m, 12H), 5.41 (dd, *J* = 5.5, 3.9 Hz, 1H, H-1, <sup>4</sup>C<sub>1</sub> (D, α)), 4.82 (d, *J* = 11.2 Hz, 1H), 4.57 (d, *J* = 12.1 Hz, 1H), 4.47 (d, *J* = 12.1 Hz, 1H), 4.41 (d, *J* = 11.2 Hz, 1H), 4.22 (d, *J* = 8.6 Hz, 1H), 3.72 – 3.62 (m, 3H), 3.06 (dd, *J* = 14.9, 3.9 Hz, 1H), 3.01 (dd, *J* = 15.1, 6.6 Hz, 1H); <sup>13</sup>C NMR (101 MHz, CDCl<sub>3</sub>) δ 206.10, 137.92, 137.89, 137.41, 132.01, 129.20, 128.56, 128.53, 128.34, 128.12, 127.96, 127.93, 122.47, 79.60, 75.18, 74.80, 73.74, 73.50, 69.32, 44.11; HMRS (ESI) calcd for C<sub>26</sub>H<sub>29</sub>O<sub>4</sub>NBr [M + NH<sub>4</sub>]<sup>+</sup> 498.1280, found 498.1281.

**(2R,3R,6S)-3-Benzyloxy-2-benzyloxymethyl-6-(4-nitrophenyl)-tetrahydro-4H-pyran-4-one (4ja):**

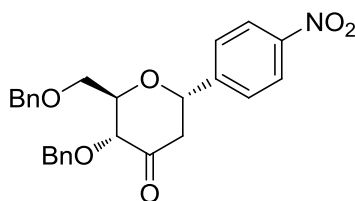

To a solution of *p*-nitroaniline (**3d**) (35.0 mg, 0.25 mmol) in tetrahydrofuran (THF) (4 mL) were added nitrosonium tetrafluoroborate (44.0 mg, 0.38 mmol) at -40 °C under argon. Then, the acetonitrile-dry ice bath was removed and the mixture was stirred at room temperature for 0.5 h, during this period, a large amount of solid suspension was observed. Then the glucal **1a** (42.0 mg, 0.1 mmol) and bis(dibenzylideneacetone)palladium (Pd(dba)<sub>2</sub>) (8.7 mg, 0.015 mmol) were added to the reaction mixture, and the mixture was stirred at room temperature for 1 h. After the completion of the reaction, the mixture was diluted with saturated sodium bicarbonate solution (sat. NaHCO<sub>3</sub>, 20 mL) and the aqueous layer was extracted with ethyl acetate (20 mL \* 3). The combined organic layer was dried over Na<sub>2</sub>SO<sub>4</sub>. The solvent was evaporated to dryness. The residue was purified by column chromatography on silica gel (ethyl acetate/petroleum ether: 1/10) to afford **4ja** as a white foam (32.7 mg, 73%). *R*<sub>f</sub> = 0.21 (ethyl acetate/petroleum ether: 1/3);  $[\alpha]_D^{23} = +74.1$  (c 2.3, CHCl<sub>3</sub>); <sup>1</sup>H NMR (400 MHz, CDCl<sub>3</sub>) δ 8.21 (d, *J* = 8.7 Hz, 2H), 7.57 (d, *J* = 8.6 Hz, 2H), 7.37 – 7.26 (m, 10H), 5.52 (t, *J* = 5.3 Hz, 1H, H-1, <sup>4</sup>C<sub>1</sub> (D, α)), 4.81 (d, *J* = 11.2 Hz, 1H), 4.57 (d, *J* = 12.1 Hz, 1H), 4.49 (d, *J* = 12.1 Hz, 1H), 4.42 (d, *J* = 11.2 Hz, 1H), 4.21 (d, *J* = 7.8 Hz, 1H), 3.82 – 3.77 (m, 1H), 3.70 (d, *J* = 2.9 Hz, 2H), 3.08 (dd, *J* = 14.8, 4.8 Hz, 1H), 3.02 (dd, *J* = 14.8, 6.0 Hz, 1H); <sup>13</sup>C NMR (100 MHz, CDCl<sub>3</sub>) δ 205.11, 147.86, 146.46, 137.79, 137.24, 128.63, 128.60, 128.36, 128.23, 128.06, 127.94, 124.06, 79.34, 76.31, 74.58, 73.82, 73.33, 69.63, 44.40; HMRS (ESI) calcd for C<sub>26</sub>H<sub>29</sub>O<sub>6</sub>N<sub>2</sub> [M + NH<sub>4</sub>]<sup>+</sup> 465.2021, found 465.2018.

**(2R,3R,6S)-3-Benzyloxy-2-benzyloxymethyl-6-(4-ethoxyphenyl)-tetrahydro-4H-pyran-4-one (4ka):**

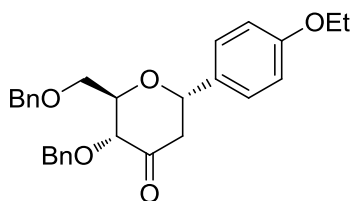

To a solution of *p*-phenetidine (**3e**) (34.0 mg, 0.25 mmol) in tetrahydrofuran (THF) (4 mL) were added nitrosonium tetrafluoroborate (44.0 mg, 0.38 mmol) at -40 °C under argon. Then, the acetonitrile-dry ice bath was removed and the mixture was stirred at room temperature for 0.5 h, during this period, a large amount of solid suspension was observed. Then the glucal **1a** (42.0 mg, 0.1 mmol) and bis(dibenzylideneacetone)palladium (Pd(dba)<sub>2</sub>) (8.7 mg, 0.015 mmol) were added to the reaction mixture, and the mixture was stirred at room temperature for 1 h. After the completion of the reaction, the mixture was diluted with saturated sodium bicarbonate solution (sat. NaHCO<sub>3</sub>, 20 mL) and the aqueous layer was extracted with ethyl acetate (20 mL \* 3). The combined organic layer was dried over Na<sub>2</sub>SO<sub>4</sub>. The solvent was evaporated to dryness. The residue was purified by column chromatography on silica gel (ethyl acetate/petroleum ether: 1/6) to afford **4la** as a gray foam (34.1 mg, 76%). *R*<sub>f</sub> = 0.19 (ethyl acetate/petroleum ether: 1/6); [*α*]<sub>D</sub><sup>20</sup> = +93.8 (c 0.2, CHCl<sub>3</sub>); <sup>1</sup>H NMR (400 MHz, CDCl<sub>3</sub>) δ 7.52 (d, *J* = 8.7 Hz, 1H), 7.34 – 7.25 (m, 12H), 7.05 (dd, *J* = 8.7, 2.7 Hz, 1H), 5.98 (t, *J* = 5.7 Hz, 1H, H-1, <sup>4</sup>C<sub>1</sub> (D, α)), 4.79 (d, *J* = 11.2 Hz, 1H), 4.56 (d, *J* = 12.2 Hz, 1H), 4.43 (d, *J* = 12.2 Hz, 1H), 4.42 (d, *J* = 11.2 Hz, 1H), 4.22 (d, *J* = 7.3 Hz, 1H, H-4), 4.06 (qd, *J* = 7.0, 2.7 Hz, 2H, -OCH<sub>2</sub>CH<sub>3</sub>), 3.78 – 3.72 (m, 1H, H-5), 3.66 (dd, *J* = 10.7, 3.4 Hz, 1H), 3.58 (dd, *J* = 10.7, 2.3 Hz, 1H), 3.07 (dd, *J* = 15.5, 5.4 Hz, 1H), 2.95 (dd, *J* = 15.3, 5.7 Hz, 1H), 1.43 (t, *J* = 7.0 Hz, 3H); <sup>13</sup>C NMR (100 MHz, CDCl<sub>3</sub>) 205.93, 159.18, 149.48, 137.84, 137.34, 129.88, 128.55, 128.34, 128.15, 127.90, 127.86, 125.67, 118.93, 110.63, 79.17, 76.53, 73.71, 73.31, 70.75, 69.45, 64.50, 44.69, 14.68; HMRS (ESI) calcd for C<sub>28</sub>H<sub>31</sub>O<sub>5</sub> [M + H]<sup>+</sup> 447.2166, found 447.2165.

**(2R,3R,6S)-3-Benzyloxy-2-benzyloxymethyl-6-(4-hydroxy-2-nitrophenyl)-tetrahydro-4H-pyran-4-one (4la):**

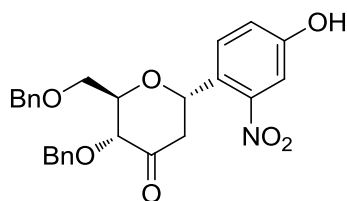

To a solution of 4-amino-3-nitrophenol (**3f**) (39.0 mg, 0.25 mmol) in tetrahydrofuran (THF) (4 mL) were added nitrosonium tetrafluoroborate (44.0 mg, 0.38 mmol) at -40 °C under argon. Then, the acetonitrile-dry ice bath was removed and the mixture was stirred at room temperature for 0.5 h, during this period, a large amount of solid suspension was observed. Then the glucal **1a** (42.0 mg, 0.1 mmol) and bis(dibenzylideneacetone)palladium (Pd(dba)<sub>2</sub>) (8.7 mg, 0.015 mmol) were added to the reaction mixture, and the mixture was stirred at room temperature for 1 h. After the completion of the reaction, the mixture was diluted with saturated sodium bicarbonate solution (sat. NaHCO<sub>3</sub>, 20 mL) and the aqueous layer was extracted with ethyl acetate (20 mL \* 3). The combined organic layer was dried over Na<sub>2</sub>SO<sub>4</sub>. The solvent was evaporated to dryness. The residue was purified by column chromatography on silica gel (ethyl acetate/petroleum ether: 1/3) to afford **4la** as a colorless oil (29.6 mg, 64%).  $R_f$  = 0.23 (ethyl acetate/petroleum ether: 1/3);  $[\alpha]_D^{19}$  = +250.7 (c 0.8, CHCl<sub>3</sub>); <sup>1</sup>H NMR (400 MHz, CDCl<sub>3</sub>) δ 7.33 – 7.25 (m, 12H), 7.04 (d,  $J$  = 2.4 Hz, 1H), 6.84 (dd,  $J$  = 8.5, 2.4 Hz, 1H), 6.67 (s, 1H), 5.94 (t,  $J$  = 5.2 Hz, 1H, H-1, <sup>4</sup>C<sub>1</sub> (D, α)), 4.79 (d,  $J$  = 11.0 Hz, 1H), 4.58 (d,  $J$  = 12.1 Hz, 1H), 4.45 (d,  $J$  = 12.1 Hz, 1H), 4.42 (d,  $J$  = 11.0 Hz, 1H), 4.26 (d,  $J$  = 7.6 Hz, 1H), 3.69 (dd,  $J$  = 10.3, 2.8 Hz, 1H), 3.61 – 3.55 (m, 2H), 3.08 (dd,  $J$  = 15.1, 6.0 Hz, 1H), 2.98 (dd,  $J$  = 15.1, 4.7 Hz, 1H); <sup>13</sup>C NMR (100 MHz, CDCl<sub>3</sub>) δ 206.55, 156.61, 149.55, 137.62, 136.78, 129.94, 128.65, 128.60, 128.56, 128.42, 128.08, 128.00, 124.54, 119.48, 111.94, 79.34, 76.26, 73.81, 70.90, 69.08, 44.36; HMRS (ESI) calcd for C<sub>26</sub>H<sub>25</sub>O<sub>7</sub>NNa [M + Na]<sup>+</sup> 486.1524, found 486.1524.

**(2S,3S,6R)-3-Benzyloxy-2-methyl-6-(4-ethoxyphenyl)-tetrahydro-4H-pyran-4-one (4ma):**



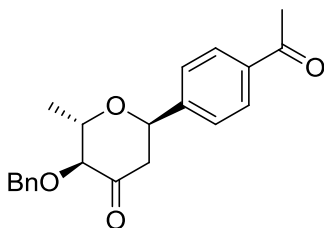

To a solution of 4-aminoacetophenone (**3g**) (34.0 mg, 0.25 mmol) in tetrahydrofuran (THF) (4 mL) were added nitrosonium tetrafluoroborate (44.0 mg, 0.38 mmol) at -40 °C under argon. Then, the acetonitrile-dry ice bath was removed and the mixture was stirred at room temperature for 1 h, during this period, a large amount of solid suspension was observed. Then the rhamnal **1f** (31.0 mg, 0.1 mmol) and bis(dibenzylideneacetone)palladium (Pd(dba)<sub>2</sub>) (8.7 mg, 0.015 mmol) were added to the reaction mixture, and the mixture was stirred at room temperature for 1 h. After the completion of the reaction, the mixture was diluted with saturated sodium bicarbonate solution (sat.NaHCO<sub>3</sub>, 20 mL) and the aqueous layer was extracted with ethyl acetate (20 mL \* 3). The combined organic layer was dried over Na<sub>2</sub>SO<sub>4</sub>. The solvent was evaporated to dryness. The residue was purified by column chromatography on silica gel (ethyl acetate/petroleum ether: 1/10) to afford **4mα** as a white foam (23.3 mg, 69%).  $R_f = 0.28$  (ethyl acetate/petroleum ether: 1/3);  $[\alpha]_D^{19} = -102.1$  (c 0.4, CHCl<sub>3</sub>); <sup>1</sup>H NMR (400 MHz, CDCl<sub>3</sub>) δ 7.94 (d,  $J = 8.3$  Hz, 2H), 7.49 (d,  $J = 8.2$  Hz, 2H), 7.37 – 7.28 (m, 5H), 5.31 – 5.29 (m, 1H, H-1, <sup>1</sup>C<sub>4</sub> (L, α)), 4.83 (d,  $J = 11.5$  Hz, 1H), 4.49 (d,  $J = 11.5$  Hz, 1H), 3.88 – 3.79 (m, 1H), 3.68 (d,  $J = 7.4$  Hz, 1H), 3.15 (dd,  $J = 14.2, 4.3$  Hz, 1H), 2.94 (dd,  $J = 14.1, 6.3$  Hz, 1H), 2.59 (s, 3H), 1.30 (d,  $J = 6.3$  Hz, 3H); <sup>13</sup>C NMR (101 MHz, CDCl<sub>3</sub>) δ 206.04, 197.68, 144.48, 137.30, 136.92, 128.85, 128.59, 128.35, 128.20, 127.35, 84.63, 74.31, 73.14, 72.84, 44.63, 26.77, 18.01; HMRS (ESI) calcd for C<sub>21</sub>H<sub>23</sub>O<sub>4</sub> [M + H]<sup>+</sup> 339.1591, found 339.1592.

**(2S,3S,6R)-3-Benzoyloxy-2-methyl-6-phenyl-tetrahydro-4H-pyran-4-one (4nα):**

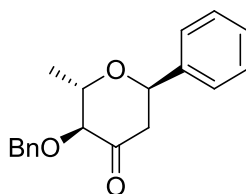

To a solution of aniline (**3b**) (23.0 mg, 0.25 mmol) in tetrahydrofuran (THF) (4 mL) was added nitrosonium tetrafluoroborate (44.0 mg, 0.38 mmol) at -40 °C under argon. Then, the acetonitrile-dry ice bath was removed and the mixture was stirred at room temperature for 1 h, during this period, a large amount of solid suspension was observed. Then the rhamnal **1f** (31.0 mg, 0.1 mmol) and bis(dibenzylideneacetone)palladium (Pd(dba)<sub>2</sub>) (8.7 mg, 0.015 mmol) were added to the reaction mixture, and the mixture was stirred at room temperature for 1 h. After the completion of the reaction, the mixture was diluted with saturated sodium bicarbonate solution (sat. NaHCO<sub>3</sub>, 20 mL) and the aqueous layer was extracted with ethyl acetate (20 mL \* 3). The combined organic layer was dried over Na<sub>2</sub>SO<sub>4</sub>. The solvent was evaporated to dryness. The residue was purified by column chromatography on silica gel (ethyl acetate/petroleum ether: 1/10) to afford **4na** as a white foam (23.7 mg, 80%).  $R_f = 0.36$  (ethyl acetate/petroleum ether: 1/6);  $[\alpha]_D^{17} = -162.3$  (c 0.5, CHCl<sub>3</sub>); <sup>1</sup>H NMR (400 MHz, CDCl<sub>3</sub>) δ 7.39 – 7.28 (m, 10H), 5.30 (dd,  $J = 6.6, 3.5$  Hz, 1H, H-1, <sup>1</sup>C<sub>4</sub> (L, α)), 4.86 (d,  $J = 11.5$  Hz, 1H), 4.49 (d,  $J = 11.5$  Hz, 1H), 3.82 (dq,  $J = 12.6, 6.3$  Hz, 1H), 3.67 (d,  $J = 7.8$  Hz, 1H), 3.16 (dd,  $J = 14.2, 3.7$  Hz, 1H), 2.94 (ddd,  $J = 14.2, 6.5, 0.9$  Hz, 1H), 1.29 (d,  $J = 6.3$  Hz, 3H); <sup>13</sup>C NMR (100 MHz, CDCl<sub>3</sub>) δ 206.62, 139.19, 137.43, 128.83, 128.58, 128.38, 128.25, 128.15, 127.32, 84.88, 74.81, 73.20, 72.10, 44.63, 18.24; HMRS (ESI) calcd for C<sub>19</sub>H<sub>20</sub>O<sub>3</sub>Na [M + Na]<sup>+</sup> 319.1305, found 319.1310.

**(2S,3S,6R)-3-Benzyloxy-2-methyl-6-(4-bromophenyl)-tetrahydro-4H-pyran-4-one (4oa):**

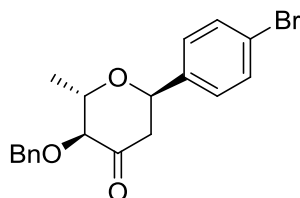

To a solution of *p*-bromoaniline (**3c**) (43.0 mg, 0.25 mmol) in tetrahydrofuran (THF) (4 mL) were added nitrosonium tetrafluoroborate (44.0 mg, 0.38 mmol) at -40 °C under argon. Then, the acetonitrile-dry ice bath was removed and the mixture was stirred at room temperature for 30 min, during this period, a large amount of solid suspension

was observed. Then the rhamnal **1f** (31.0 mg, 0.1 mmol) and bis(dibenzylideneacetone)palladium (Pd(dba)<sub>2</sub>) (8.7 mg, 0.015 mmol) were added to the reaction mixture, and the mixture was stirred at room temperature for 1 h. After the completion of the reaction, the mixture was diluted with saturated sodium bicarbonate solution (sat. NaHCO<sub>3</sub>, 20 mL) and the aqueous layer was extracted with ethyl acetate (20 mL \* 3). The combined organic layer was dried over Na<sub>2</sub>SO<sub>4</sub>. The solvent was evaporated to dryness. The residue was purified by column chromatography on silica gel (ethyl acetate/petroleum ether: 1/12) to afford **40a** as a white foam (28.1 mg, 75%).  $R_f$  = 0.35 (ethyl acetate/petroleum ether: 1/6);  $[\alpha]_D^{22}$  = -98.5 (c 0.2, CHCl<sub>3</sub>); <sup>1</sup>H NMR (400 MHz, CDCl<sub>3</sub>) δ 7.47 (d,  $J$  = 8.5 Hz, 2H), 7.36 – 7.24 (m, 7H), 5.23 (dd,  $J$  = 6.2, 4.0 Hz, 1H, H-1, <sup>1</sup>C<sub>4</sub> (L, α)), 4.84 (d,  $J$  = 11.5 Hz, 1H), 4.48 (d,  $J$  = 11.5 Hz, 1H), 3.84 – 3.76 (m, 1H), 3.66 (d,  $J$  = 7.6 Hz, 1H), 3.09 (dd,  $J$  = 14.2, 3.9 Hz, 1H), 2.92 (dd,  $J$  = 14.1, 6.4 Hz, 1H), 1.28 (d,  $J$  = 6.4 Hz, 3H); <sup>13</sup>C NMR (100 MHz, CDCl<sub>3</sub>) δ 206.25, 138.27, 137.31, 131.96, 129.01, 128.59, 128.36, 128.18, 122.35, 84.69, 74.22, 73.16, 72.40, 44.55, 18.13; HMRS (ESI) calcd for C<sub>19</sub>H<sub>19</sub>O<sub>3</sub>BrNa [M + Na]<sup>+</sup> 397.0405, found 397.0409.

**(2S,3S,6R)-3-Benzoyloxy-2-methyl-6-(3-nitrophenyl)-tetrahydro-4H-pyran-4-one (4pa):**

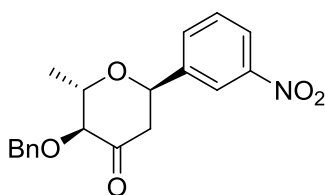

To a solution of 3-nitroaniline (**3h**) (35.0 mg, 0.25 mmol) in tetrahydrofuran (THF) (4 mL) were added nitrosonium tetrafluoroborate (44.0 mg, 0.38 mmol) at -40 °C under argon. Then, the acetonitrile-dry ice bath was removed and the mixture was stirred at room temperature for 0.5 h, during this period, a large amount of solid suspension was observed. Then the rhamnal **1f** (31.0 mg, 0.1 mmol) and bis(dibenzylideneacetone)palladium (Pd(dba)<sub>2</sub>) (8.7 mg, 0.015 mmol) were added to the reaction mixture, and the mixture was stirred at room temperature for 1 h. After the

completion of the reaction, the mixture was diluted with saturated sodium bicarbonate solution (sat.NaHCO<sub>3</sub>, 20 mL) and the aqueous layer was extracted with ethyl acetate (20 mL \* 3). The combined organic layer was dried over Na<sub>2</sub>SO<sub>4</sub>. The solvent was evaporated to dryness. The residue was purified by column chromatography on silica gel (ethyl acetate/petroleum ether: 1/10) to afford **4pa** as a white foam (26.6 mg, 78%).  $R_f$  = 0.38 (ethyl acetate/petroleum ether: 1/3);  $[\alpha]_D^{19}$  = -87.3 (c 0.3, CHCl<sub>3</sub>); <sup>1</sup>H NMR (400 MHz, CDCl<sub>3</sub>)  $\delta$  8.30 (s, 1H), 8.15 (dd,  $J$  = 8.1, 1.5 Hz, 1H), 7.72 (d,  $J$  = 7.7 Hz, 1H), 7.54 (t,  $J$  = 8.0 Hz, 1H), 7.37 – 7.28 (m, 5H), 5.32 (t,  $J$  = 5.4 Hz, 1H, H-1, <sup>1</sup>C<sub>4</sub> (L,  $\alpha$ )), 4.81 (d,  $J$  = 11.6 Hz, 1H), 4.49 (d,  $J$  = 11.6 Hz, 1H), 3.95 – 3.83 (m, 1H), 3.70 (d,  $J$  = 6.9 Hz, 1H), 3.16 (dd,  $J$  = 14.1, 5.0 Hz, 1H), 2.96 (ddd,  $J$  = 14.1, 5.9, 0.6 Hz, 1H), 1.33 (d,  $J$  = 6.4 Hz, 3H); <sup>13</sup>C NMR (100 MHz, CDCl<sub>3</sub>)  $\delta$  205.63, 148.69, 141.67, 137.08, 132.82, 129.86, 128.61, 128.34, 128.24, 123.18, 122.22, 84.32, 73.65, 73.33, 73.02, 44.68, 17.69; HMRS (ESI) calcd for C<sub>19</sub>H<sub>19</sub>O<sub>5</sub>NNa [M + Na]<sup>+</sup> 364.1156, found 364.1165.

**(2S,3S,6R)-3-Benzyloxy-2-methyl-6-(3-carboxyphenyl)-tetrahydro-4H-pyran-4-one (4qa):**

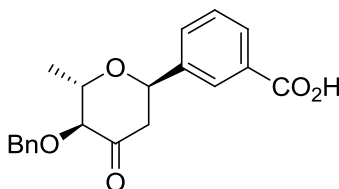

To a solution of 3-aminobenzoic acid (**3i**) (34.0 mg, 0.25 mmol) in tetrahydrofuran (THF) (4 mL) were added nitrosonium tetrafluoroborate (44.0 mg, 0.38 mmol) at -40 °C under argon. Then, the acetonitrile-dry ice bath was removed and the mixture was stirred at room temperature for 0.5 h, during this period, a large amount of solid suspension was observed. Then the rhamnal **1f** (31.0 mg, 0.1 mmol) and bis(dibenzylideneacetone)palladium (Pd(dba)<sub>2</sub>) (8.7 mg, 0.015 mmol) were added to the reaction mixture, and the mixture was stirred at room temperature for 1 h. After the completion of the reaction, the mixture was diluted with saturated sodium bicarbonate solution (sat.NaHCO<sub>3</sub>, 20 mL) and the aqueous layer was extracted with

ethyl acetate (20 mL \* 3). The combined organic layer was dried over Na<sub>2</sub>SO<sub>4</sub>. The solvent was evaporated to dryness. The residue was purified by column chromatography on silica gel (MeOH/DCM: 1/20) to afford **4qa** as a white foam (17.0 mg, 49%).  $R_f = 0.24$  (MeOH/DCM: 1/20);  $[\alpha]_D^{20} = -81.8$  (c 0.1, CHCl<sub>3</sub>); <sup>1</sup>H NMR (400 MHz, CDCl<sub>3</sub>)  $\delta$  8.16 (s, 1H), 8.04 (d,  $J = 7.7$  Hz, 1H), 7.65 (d,  $J = 7.8$  Hz, 1H), 7.48 (t,  $J = 7.8$  Hz, 1H), 7.37 – 7.28 (m, 5H), 5.33 (t,  $J = 5.2$  Hz, 1H, H-1, <sup>1</sup>C<sub>4</sub> (L,  $\alpha$ )), 4.84 (d,  $J = 11.6$  Hz, 1H), 4.50 (d,  $J = 11.6$  Hz, 1H), 3.96 – 3.83 (m, 1H), 3.69 (d,  $J = 7.2$  Hz, 1H), 3.19 (dd,  $J = 14.1, 4.6$  Hz, 1H), 2.95 (dd,  $J = 13.9, 6.2$  Hz, 1H), 1.32 (d,  $J = 6.4$  Hz, 3H); <sup>13</sup>C NMR (100 MHz, CDCl<sub>3</sub>)  $\delta$  206.19, 171.50, 140.04, 137.27, 132.28, 130.04, 129.99, 129.11, 129.04, 128.60, 128.38, 128.20, 84.55, 77.48, 77.16, 76.84, 74.21, 73.07, 72.84, 44.74, 17.90; HMRS (ESI) calcd for C<sub>20</sub>H<sub>24</sub>O<sub>5</sub>N [M + NH<sub>4</sub>]<sup>+</sup> 358.1649, found 358.1652.

**(2S,3S,6R)-3-Benzoyloxy-2-methyl-6-(1-naphthyl)-tetrahydro-4H-pyran-4-one**  
**(4ra):**

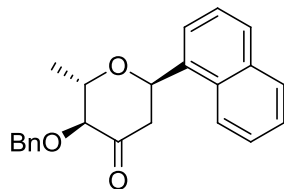

To a solution of  $\alpha$ -naphthylamine (**3j**) (36.0 mg, 0.25 mmol) in tetrahydrofuran (THF) (4 mL) were added nitrosonium tetrafluoroborate (44.0 mg, 0.38 mmol) at -40 °C under argon. Then, the acetonitrile-dry ice bath was removed and the mixture was stirred at room temperature for 0.5 h, during this period, a large amount of solid suspension was observed. Then the rhamnal **1f** (31.0 mg, 0.1 mmol) and bis(dibenzylideneacetone)palladium (Pd(dba)<sub>2</sub>) (8.7 mg, 0.015 mmol) were added to the reaction mixture, and the mixture was stirred at room temperature for 1 h. After the completion of the reaction, the mixture was diluted with saturated sodium bicarbonate solution (sat.NaHCO<sub>3</sub>, 20 mL) and the aqueous layer was extracted with ethyl acetate (20 mL \* 3). The combined organic layer was dried over Na<sub>2</sub>SO<sub>4</sub>. The solvent was evaporated to dryness. The residue was purified by column

chromatography on silica gel (ethyl acetate/petroleum ether: 1/10) to afford **4ra** as a white foam (20.8 mg, 60%).  $R_f = 0.29$  (ethyl acetate/petroleum ether: 1/6);  $[\alpha]_D^{18} = -278.3$  (c 0.2,  $\text{CHCl}_3$ );  $^1\text{H}$  NMR (400 MHz,  $\text{CDCl}_3$ )  $\delta$  8.36 (d,  $J = 8.1$  Hz, 1H), 7.88 – 7.78 (m, 2H), 7.57 – 7.45 (m, 3H), 7.41 – 7.28 (m, 6H), 5.97 (dd,  $J = 6.7, 2.4$  Hz, 1H, H-1,  $^1\text{C}_4$  (L,  $\alpha$ )), 4.91 (d,  $J = 11.5$  Hz, 1H), 4.55 (d,  $J = 11.5$  Hz, 1H), 3.72 (d,  $J = 8.2$  Hz, 1H), 3.68 – 3.60 (m, 1H), 3.28 (dd,  $J = 14.6, 2.7$  Hz, 1H), 3.13 (dd,  $J = 14.6, 6.9$  Hz, 1H), 1.20 (d,  $J = 6.1$  Hz, 3H);  $^{13}\text{C}$  NMR (100 MHz,  $\text{CDCl}_3$ )  $\delta$  207.31, 137.55, 134.43, 134.21, 131.63, 129.51, 128.84, 128.57, 128.39, 128.13, 126.48, 126.13, 126.05, 125.01, 124.78, 85.27, 73.45, 72.69, 71.60, 44.88, 18.56; HMRS (ESI) calcd for  $\text{C}_{23}\text{H}_{22}\text{O}_3\text{Na}$   $[\text{M} + \text{Na}]^+$  369.1462, found 369.1468.

**(2S,3S,6R)-3-Benzyloxy-2-methyl-6-(2-methyl-5-fluorophenyl)-tetrahydro-4H-pyran-4-one (4sa):**

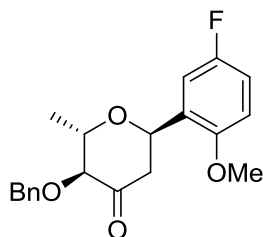

To a solution of 5-fluoro-2-methoxy-aniline (**3k**) (35.0 mg, 0.25 mmol) in tetrahydrofuran (THF) (4 mL) were added nitrosonium tetrafluoroborate (44.0 mg, 0.38 mmol) at  $-40$  °C under argon. Then, the acetonitrile-dry ice bath was removed and the mixture was stirred at room temperature for 0.5 h, during this period, a large amount of solid suspension was observed. Then the rhamnal **1f** (31.0 mg, 0.1 mmol) and bis(dibenzylideneacetone)palladium ( $\text{Pd}(\text{dba})_2$ ) (8.7 mg, 0.015 mmol) were added to the reaction mixture, and the mixture was stirred at room temperature for 1 h. After the completion of the reaction, the mixture was diluted with saturated sodium bicarbonate solution (sat.  $\text{NaHCO}_3$ , 20 mL) and the aqueous layer was extracted with ethyl acetate (20 mL \* 3). The combined organic layer was dried over  $\text{Na}_2\text{SO}_4$ . The solvent was evaporated to dryness. The residue was purified by column chromatography on silica gel (ethyl acetate/petroleum ether: 1/10) to afford **4sa** as a

white foam (21.7 mg, 63%).  $R_f = 0.33$  (ethyl acetate/petroleum ether: 1/6);  $[\alpha]_D^{20} = -32.9$  (c 0.5,  $\text{CHCl}_3$ );  $^1\text{H}$  NMR (400 MHz,  $\text{CDCl}_3$ )  $\delta$  7.39 – 7.28 (m, 5H), 7.23 (dd,  $J = 9.2, 3.1$  Hz, 1H), 6.98 – 6.92 (m, 1H), 6.79 (dd,  $J = 9.0, 4.3$  Hz, 1H), 5.39 (dd,  $J = 7.7, 4.9$  Hz, 1H, H-1,  $^1\text{C}_4$  (L,  $\alpha$ )), 4.77 (d,  $J = 11.7$  Hz, 1H), 4.49 (d,  $J = 11.7$  Hz, 1H), 4.31 – 4.23 (m, 1H), 3.80 (s, 3H), 3.61 (dd,  $J = 4.9, 0.9$  Hz, 1H), 2.89 (dd,  $J = 14.2, 7.7$  Hz, 1H), 2.79 (ddd,  $J = 14.2, 4.8, 0.9$  Hz, 1H), 1.29 (d,  $J = 6.7$  Hz, 3H);  $^{13}\text{C}$  NMR (100 MHz,  $\text{CDCl}_3$ )  $\delta$  207.34, 157.22 (d,  $J = 239.0$  Hz), 152.42, 137.30, 130.45 (d,  $J = 6.8$  Hz), 128.63, 128.31, 128.19, 114.99 (d,  $J = 22.9$  Hz), 114.62 (d,  $J = 24.5$  Hz), 111.56 (d,  $J = 8.1$  Hz), 84.14, 73.70, 72.66, 68.54, 55.97, 45.30, 16.81;  $^{19}\text{F}$  NMR (376 MHz,  $\text{CDCl}_3$ )  $\delta$  -122.92; HMRS (ESI) calcd for  $\text{C}_{20}\text{H}_{21}\text{O}_4\text{Na}$   $[\text{M} + \text{Na}]^+$  367.1317, found 367.1313.

**(2S,3S,6R)-3-Benzyloxy-2-methyl-6-(3,5-bis-trifluoromethylphenyl)-tetrahydro-4H-pyran-4-one (4ta):**

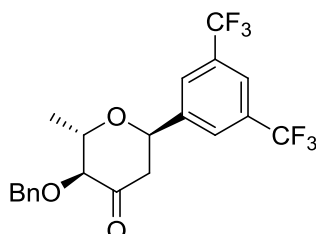

To a solution of 3,5-bis(trifluoromethyl)aniline (**3l**) (65.0 mg, 0.25 mmol) in tetrahydrofuran (THF) (4 mL) were added nitrosonium tetrafluoroborate (44.0 mg, 0.38 mmol) at  $-40\text{ }^\circ\text{C}$  under argon. Then, the acetonitrile-dry ice bath was removed and the mixture was stirred at room temperature for 0.5 h, during this period, a large amount of solid suspension was observed. Then the rhamnal **1f** (31.0 mg, 0.1 mmol) and bis(dibenzylideneacetone)palladium ( $\text{Pd}(\text{dba})_2$ ) (8.7 mg, 0.015 mmol) were added to the reaction mixture, and the mixture was stirred at room temperature for 1 h. After the completion of the reaction, the mixture was diluted with saturated sodium bicarbonate solution (sat.  $\text{NaHCO}_3$ , 20 mL) and the aqueous layer was extracted with ethyl acetate (20 mL \* 3). The combined organic layer was dried over  $\text{Na}_2\text{SO}_4$ . The solvent was evaporated to dryness. The residue was purified by column chromatography on silica

gel (ethyl acetate/petroleum ether: 1/10) to afford **4ta** as a white foam (29.8 mg, 69%).  $R_f = 0.31$  (ethyl acetate/petroleum ether: 1/6);  $[\alpha]_D^{17} = -56.4$  (c 0.3,  $\text{CHCl}_3$ );  $^1\text{H}$  NMR (400 MHz,  $\text{CDCl}_3$ )  $\delta$  7.86 (s, 2H), 7.82 (s, 1H), 7.38 – 7.29 (m, 5H), 5.28 (t,  $J = 5.8$  Hz, 1H, H-1,  $^1\text{C}_4$  (L,  $\alpha$ )), 4.78 (d,  $J = 11.6$  Hz, 1H), 4.48 (d,  $J = 11.6$  Hz, 1H), 4.06 (p,  $J = 6.5$  Hz, 1H), 3.68 (dd,  $J = 5.9, 0.9$  Hz, 1H), 3.14 (dd,  $J = 14.0, 6.4$  Hz, 1H), 2.88 (ddd,  $J = 14.0, 5.3, 0.9$  Hz, 1H), 1.33 (d,  $J = 6.6$  Hz, 3H);  $^{13}\text{C}$  NMR (100 MHz,  $\text{CDCl}_3$ )  $\delta$  205.26, 142.49, 136.97, 132.27 (q,  $J = 33.4$  Hz,  $-\text{CF}_3$ ), 128.69, 128.39, 128.35, 126.93 – 126.89 (m), 123.28 (q,  $J = 272.9$  Hz), 122.31 – 122.21 (m), 84.01, 74.04, 73.23, 72.85, 45.04, 17.14;  $^{19}\text{F}$  NMR (376 MHz,  $\text{CDCl}_3$ )  $\delta$  -62.84 (s, 6F); HMRS (ESI) calcd for  $\text{C}_{22}\text{H}_{19}\text{O}_5\text{F}_6$   $[\text{M} + \text{HCO}_2]^-$  477.1143, found 477.1143.

**(2S,3S,6R)-3-Benzyloxy-2-methyl-6-(4-biphenyl)-tetrahydro-4H-pyran-4-one**  
(**4ua**):

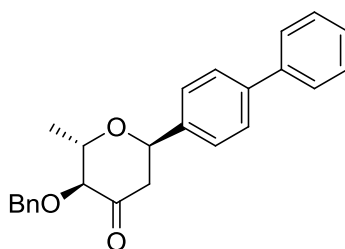

To a solution of 4-aminodiphenyl (**3m**) (42.0 mg, 0.25 mmol) in tetrahydrofuran (THF) (4 mL) were added nitrosonium tetrafluoroborate (44.0 mg, 0.38 mmol) at  $-40^\circ\text{C}$  under argon. Then, the acetonitrile-dry ice bath was removed and the mixture was stirred at room temperature for 0.5 h, during this period, a large amount of solid suspension was observed. Then the rhamnal **1f** (31.0 mg, 0.1 mmol) and bis(dibenzylideneacetone)palladium ( $\text{Pd}(\text{dba})_2$ ) (8.7 mg, 0.015 mmol) were added to the reaction mixture, and the mixture was stirred at room temperature for 1 h. After the completion of the reaction, the mixture was diluted with saturated sodium bicarbonate solution (sat.  $\text{NaHCO}_3$ , 20 mL) and the aqueous layer was extracted with ethyl acetate (20 mL \* 3). The combined organic layer was dried over  $\text{Na}_2\text{SO}_4$ . The solvent was evaporated to dryness. The residue was purified by column chromatography on silica gel (ethyl acetate/petroleum ether: 1/10) to afford **4ua** as a white foam (24.6 mg, 66%).



$R_f = 0.26$  (ethyl acetate/petroleum ether: 1/6);  $[\alpha]_D^{21} = -119.8$  (c 0.4,  $\text{CHCl}_3$ );  $^1\text{H}$  NMR (400 MHz,  $\text{CDCl}_3$ )  $\delta$  7.60 – 7.53 (m, 4H), 7.47 – 7.40 (m, 4H), 7.37 – 7.28 (m, 6H), 5.35 (dd,  $J = 6.4, 3.5$  Hz, 1H, H-1,  $^1\text{C}_4$  (L,  $\alpha$ )), 4.87 (d,  $J = 11.5$  Hz, 1H), 4.51 (d,  $J = 11.5$  Hz, 1H), 3.91 – 3.82 (m, 1H), 3.69 (d,  $J = 7.9$  Hz, 1H), 3.19 (dd,  $J = 14.2, 3.5$  Hz, 1H), 2.98 (dd,  $J = 14.2, 6.6$  Hz, 1H), 1.32 (d,  $J = 6.3$  Hz, 3H);  $^{13}\text{C}$  NMR (100 MHz,  $\text{CDCl}_3$ )  $\delta$  206.60, 141.18, 140.67, 138.13, 137.42, 128.94, 128.59, 128.39, 128.16, 127.79, 127.60, 127.57, 127.25, 84.91, 74.66, 73.25, 72.15, 44.65, 18.33; HMRS (ESI) calcd for  $\text{C}_{25}\text{H}_{28}\text{O}_3\text{N}$   $[\text{M} + \text{NH}_4]^+$  390.2064, found 390.2072.

**(2R,3R,6R)-3-Benzyloxy-2-benzyloxymethyl-6-(4-methoxyphenyl)-tetrahydro-4H-pyran-4-one (4a $\beta$ ):**

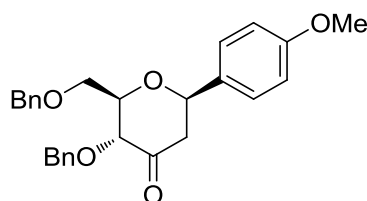

To a solution of **4a $\alpha$**  (10.0 mg, 0.023 mmol) in ether ( $\text{Et}_2\text{O}$ ) (1 mL) was added  $\text{HBF}_4$  (50  $\mu\text{L}$ , 50% V/V in  $\text{Et}_2\text{O}$ ), and the mixture was stirred at room temperature for 1 h. After the completion of the reaction, the mixture was diluted with saturated sodium bicarbonate solution (sat.  $\text{NaHCO}_3$ , 10 mL) and the aqueous layer was extracted with ethyl acetate (10 mL \* 3). The combined organic layer was dried over  $\text{Na}_2\text{SO}_4$ . The solvent was evaporated to dryness. The residue was purified by column chromatography on silica gel (ethyl acetate/petroleum ether: 1/10) to afford **4a $\beta$**  as a white foam (9.2 mg, 92%).  $R_f = 0.30$  (ethyl acetate/petroleum ether: 1/6);  $[\alpha]_D^{16} = +105.0$  (c 0.1,  $\text{CHCl}_3$ );  $^1\text{H}$  NMR (400 MHz,  $\text{CDCl}_3$ )  $\delta$  7.34 – 7.29 (m, 12H), 6.90 (d,  $J = 8.7$  Hz, 2H), 4.94 (d,  $J = 11.1$  Hz, 1H), 4.66 (d,  $J = 12.2$  Hz, 1H), 4.63 (dd,  $J = 10.6, 2.9$  Hz, 1H, H-1), 4.56 (d,  $J = 12.2$  Hz, 1H), 4.50 (d,  $J = 11.1$  Hz, 1H), 4.27 (d,  $J = 8.9$  Hz, 1H), 3.83 – 3.81 (m, 3H), 3.81 (s, 3H, MeO-), 2.82 (dd,  $J = 13.8, 10.7$  Hz, 1H), 2.71 (dd,  $J = 13.8, 3.1$  Hz, 1H);  $^{13}\text{C}$  NMR (100 MHz,  $\text{CDCl}_3$ )  $\delta$  206.04, 159.66, 138.38, 137.63, 132.40, 128.54, 128.52, 128.39, 128.09, 127.87, 127.78, 127.24, 114.14,

81.00, 79.90, 79.35, 73.71, 73.67, 69.39, 55.48, 50.11; HMRS (ESI) calcd for HMRS (ESI) calcd for C<sub>27</sub>H<sub>29</sub>O<sub>5</sub> [M + H]<sup>+</sup> 433.2010, found 433.2006.

**(2R,3R,6R)-3-Methoxy-2-methoxymethyl-6-(4-methoxyphenyl)-tetrahydro-4H-pyran-4-one (4bβ):**

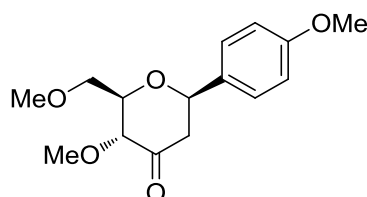

To a solution of **4ba** (10.0 mg, 0.036 mmol) in ether (Et<sub>2</sub>O) (1 mL) was added HBF<sub>4</sub> (50 μL, 50% V/V in Et<sub>2</sub>O), and the mixture was stirred at room temperature for 1 h. After the completion of the reaction, the mixture was diluted with saturated sodium bicarbonate solution (sat.NaHCO<sub>3</sub>, 10 mL) and the aqueous layer was extracted with ethyl acetate (10 mL \* 3). The combined organic layer was dried over Na<sub>2</sub>SO<sub>4</sub>. The solvent was evaporated to dryness. The residue was purified by column chromatography on silica gel (ethyl acetate/petroleum ether: 1/6) to afford **4bβ** as a white foam (8.3 mg, 83%). R<sub>f</sub> = 0.27 (ethyl acetate/petroleum ether: 1/3); [α]<sub>D</sub><sup>15</sup> = +132.8 (c 0.1, CHCl<sub>3</sub>); <sup>1</sup>H NMR (400 MHz, CDCl<sub>3</sub>) δ 7.30 (d, *J* = 8.8 Hz, 2H), 6.89 (d, *J* = 8.8 Hz, 2H), 4.61 (dd, *J* = 11.3, 2.7 Hz, 1H, H-1, <sup>4</sup>C<sub>1</sub> (D, β)), 4.00 (d, *J* = 9.9 Hz, 1H), 3.80 (s, 3H), 3.75 – 3.70 (m, 3H), 3.56 (s, 3H), 3.46 (s, 3H), 2.78 (ddd, *J* = 13.7, 11.3, 0.8 Hz, 1H), 2.70 (dd, *J* = 13.7, 2.8 Hz, 1H); <sup>13</sup>C NMR (100 MHz, CDCl<sub>3</sub>) δ 206.13, 159.68, 132.20, 127.32, 114.14, 82.09, 80.97, 79.48, 71.83, 59.89, 59.84, 55.47, 49.96; HMRS (ESI) calcd for C<sub>15</sub>H<sub>21</sub>O<sub>5</sub> [M + H]<sup>+</sup> 281.1384, found 281.1385.

**(2R,3R,6R)-3-*Tert*-butyldimethylsilyloxy-2-hydroxymethyl-6-(4-methoxyphenyl)-tetrahydro-4H-pyran-4-one (4cβ):**

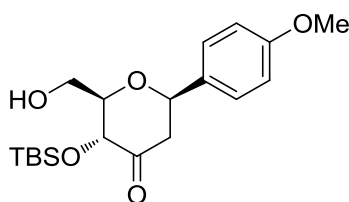

To a solution of **4ca** (10.0 mg, 0.021 mmol) in ether (2 mL) was added HBF<sub>4</sub> (50  $\mu$ L, 50% V/V in Et<sub>2</sub>O), and the mixture was stirred at room temperature for 1 h. After the completion of the reaction, the mixture was diluted with saturated sodium bicarbonate solution (sat.NaHCO<sub>3</sub>, 10 mL) and the aqueous layer was extracted with ethyl acetate (10 mL \* 3). The combined organic layer was dried over Na<sub>2</sub>SO<sub>4</sub>. The solvent was evaporated to dryness. The residue was purified by column chromatography on silica gel (ethyl acetate/petroleum ether: 1/6) to afford **4cb** as a colorless oil (5.8 mg, 75%). *R*<sub>f</sub> = 0.31 (ethyl acetate/petroleum ether: 1/3); [ $\alpha$ ]<sub>D</sub><sup>19</sup> = +96.7 (c 0.2, CHCl<sub>3</sub>); <sup>1</sup>H NMR (400 MHz, CDCl<sub>3</sub>)  $\delta$  7.29 (d, *J* = 8.6 Hz, 2H), 6.91 (d, *J* = 8.7 Hz, 2H), 4.67 (dd, *J* = 11.2, 2.4 Hz, 1H, H-1, <sup>4</sup>C<sub>1</sub> (D,  $\beta$ )), 4.36 (d, *J* = 9.4 Hz, 1H), 4.04 – 3.95 (m, 1H), 3.89 – 3.76 (m, 1H), 3.81 (s, 3H), 3.70 – 3.64 (m, 1H), 2.76 (dd, *J* = 13.8, 11.3 Hz, 1H), 2.69 (dd, *J* = 13.8, 2.7 Hz, 1H), 2.03 – 2.00 (m, 1H, -OH), 0.94 (s, 9H), 0.20 (s, 3H), 0.07 (s, 3H); <sup>13</sup>C NMR (100 MHz, CDCl<sub>3</sub>)  $\delta$  205.44, 159.88, 132.10, 127.39, 114.25, 82.51, 79.35, 75.32, 62.71, 55.50, 49.19, 25.92, 18.62, -4.13, -5.45; HMRS (ESI) calcd for C<sub>19</sub>H<sub>31</sub>O<sub>5</sub>Si [M + H]<sup>+</sup> 367.1936, found 367.1938.

**(2R,3S,6R)-3-Benzoyloxy-2-benzoyloxymethyl-6-(4-methoxyphenyl)-tetrahydro-4H-pyran-4-one (4db):**

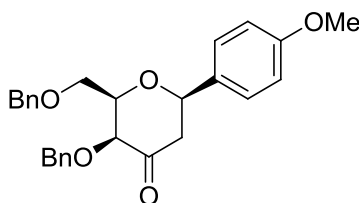

To a solution of **4da** (10.0 mg, 0.023 mmol) in ether (1 mL) was added HBF<sub>4</sub> (50  $\mu$ L, 50% V/V in Et<sub>2</sub>O), and the mixture was stirred at room temperature for 1 h. After the completion of the reaction, the mixture was diluted with saturated sodium bicarbonate solution (sat.NaHCO<sub>3</sub>, 10 mL) and the aqueous layer was extracted with ethyl acetate (10 mL \* 3). The combined organic layer was dried over Na<sub>2</sub>SO<sub>4</sub>. The solvent was evaporated to dryness. The residue was purified by column chromatography on silica gel (ethyl acetate/petroleum ether: 1/10) to afford **4db** as a colorless oil (6.4 mg, 64%). *R*<sub>f</sub> = 0.35 (ethyl acetate/petroleum ether: 1/6); [ $\alpha$ ]<sub>D</sub><sup>21</sup> =

+30.5 (c 0.2, CHCl<sub>3</sub>); <sup>1</sup>H NMR (400 MHz, CDCl<sub>3</sub>) δ 7.34 – 7.25 (m, 12H), 6.88 (d, *J* = 8.5 Hz, 2H), 4.62 – 4.51 (m, 3H, H-1, Bn), 4.47 (d, *J* = 12.0 Hz, 1H, Bn), 4.41 (d, *J* = 11.9 Hz, 1H, Bn), 3.91 (t, *J* = 6.0 Hz, 1H, H-4), 3.86 – 3.77 (m, 3H, H-5, H-6a, H-6b), 3.80 (s, 3H), 3.20 – 3.12 (m, 1H), 2.48 (d, *J* = 13.2 Hz, 1H); <sup>13</sup>C NMR (100 MHz, CDCl<sub>3</sub>) δ 207.06, 159.71, 138.19, 137.21, 132.70, 128.59, 128.53, 128.25, 128.18, 127.85, 127.42, 114.14, 80.13, 79.86, 79.69, 73.67, 72.24, 68.58, 55.48, 47.30; HMRS (ESI) calcd for C<sub>27</sub>H<sub>29</sub>O<sub>5</sub> [M + H]<sup>+</sup> 433.2010, found 433.2008.

**(2R,3R,6R)-3-Benzyloxy-2-methyl-6-(4-methoxyphenyl)-tetrahydro-4H-pyran-4-one (4eβ):**

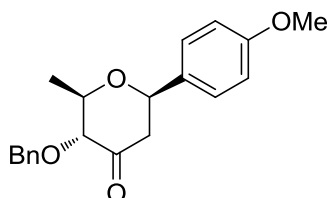

To a solution of **4eα** (10.0 mg, 0.03 mmol) in ether (1 mL) was added HBF<sub>4</sub> (50 μL, 50% V/V in Et<sub>2</sub>O), and the mixture was stirred at room temperature for 1 h. After the completion of the reaction, the mixture was diluted with saturated sodium bicarbonate solution (sat.NaHCO<sub>3</sub>, 10 mL) and the aqueous layer was extracted with ethyl acetate (10 mL \* 3). The combined organic layer was dried over Na<sub>2</sub>SO<sub>4</sub>. The solvent was evaporated to dryness. The residue was purified by column chromatography on silica gel (ethyl acetate/petroleum ether: 1/10) to afford **4eβ** as a white foam (9.2 mg, 92%). *R<sub>f</sub>* = 0.41 (ethyl acetate/petroleum ether: 1/6); [*a*]<sub>D</sub><sup>16</sup> = +187.1 (c 0.1, CHCl<sub>3</sub>); <sup>1</sup>H NMR (400 MHz, CDCl<sub>3</sub>) δ 7.42 – 7.27 (m, 7H), 6.89 (d, *J* = 8.7 Hz, 2H), 4.99 (d, *J* = 11.5 Hz, 1H), 4.62 (dd, *J* = 10.7, 3.3 Hz, 1H, H-1, <sup>4</sup>C<sub>1</sub> (D, β)), 4.54 (d, *J* = 11.5 Hz, 1H), 3.80 (s, 3H), 3.82 – 3.74 (m, 2H), 2.76 (dd, *J* = 13.6, 11.1 Hz, 1H), 2.70 (dd, *J* = 13.7, 3.4 Hz, 1H), 1.46 – 1.44 (m, 3H); <sup>13</sup>C NMR (100 MHz, CDCl<sub>3</sub>) δ 205.72, 159.65, 137.59, 132.43, 128.60, 128.45, 128.17, 127.24, 114.18, 85.06, 79.11, 77.80, 73.45, 55.47, 50.14, 19.51; HMRS (ESI) calcd for C<sub>20</sub>H<sub>22</sub>O<sub>4</sub>Na [M + Na]<sup>+</sup> 349.1810, found 349.1817.

**(2S,3S,6S)-3-Benzyloxy-2-methyl-6-(4-methoxyphenyl)-tetrahydro-4H-pyran-4-one (4fβ):**

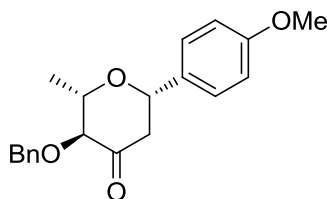

To a solution of **4fa** (10.0 mg, 0.03 mmol) in ether (1 mL) was added HBF<sub>4</sub> (50 μL, 50% V/V in Et<sub>2</sub>O), and the mixture was stirred at room temperature for 1 h. After the completion of the reaction, the mixture was diluted with saturated sodium bicarbonate solution (sat.NaHCO<sub>3</sub>, 10 mL) and the aqueous layer was extracted with ethyl acetate (10 mL \* 3). The combined organic layer was dried over Na<sub>2</sub>SO<sub>4</sub>. The solvent was evaporated to dryness. The residue was purified by column chromatography on silica gel (ethyl acetate/petroleum ether: 1/10) to afford **4fβ** as a white foam (9.0 mg, 90%). *R<sub>f</sub>* = 0.42 (ethyl acetate/petroleum ether: 1/6); [*α*]<sub>D</sub><sup>22</sup> = -224.9 (c 0.7, CHCl<sub>3</sub>); <sup>1</sup>H NMR (400 MHz, CDCl<sub>3</sub>) δ 7.42 – 7.25 (m, 7H), 6.90 – 6.87 (m, 2H), 4.99 (d, *J* = 11.5 Hz, 1H), 4.62 (dd, *J* = 10.5, 3.5 Hz, 1H, H-1, <sup>1</sup>C<sub>4</sub> (L, β)), 4.54 (d, *J* = 11.5 Hz, 1H), 3.80 (s, 3H), 3.79 – 3.74 (m, 2H), 2.79 – 2.67 (m, 2H), 1.45 (dd, *J* = 3.9, 1.8 Hz, 3H); <sup>13</sup>C NMR (100 MHz, CDCl<sub>3</sub>) δ 205.69, 159.69, 137.64, 132.49, 128.61, 128.45, 128.17, 127.24, 114.21, 85.11, 79.12, 77.82, 73.47, 55.48, 50.15, 19.52; HMRS (ESI) calcd for C<sub>20</sub>H<sub>22</sub>O<sub>4</sub>Na [M + Na]<sup>+</sup> 349.1811, found 349.1815.

**(2R,3R,6R)-3-Benzyloxy-2-benzyloxymethyl-6-phenyl-tetrahydro-4H-pyran-4-one (4hβ):**

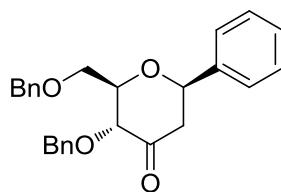

To a solution of **4ha** (10.0 mg, 0.025 mmol) in ether (1 mL) was added HBF<sub>4</sub> (50 μL, 50% V/V in Et<sub>2</sub>O), and the mixture was stirred at room temperature for 5 h. After the completion of the reaction, the mixture was diluted with saturated sodium bicarbonate solution (sat.NaHCO<sub>3</sub>, 10 mL) and the aqueous layer was extracted with

ethyl acetate (10 mL \* 3). The combined organic layer was dried over Na<sub>2</sub>SO<sub>4</sub>. The solvent was evaporated to dryness. The residue was purified by column chromatography on silica gel (ethyl acetate/petroleum ether: 1/10) to afford **4hβ** as a white foam (6.1 mg, 61%). *R<sub>f</sub>* = 0.37 (ethyl acetate/petroleum ether: 1/6); [*a*]<sub>D</sub><sup>20</sup> = +84.8 (c 0.2, CHCl<sub>3</sub>); <sup>1</sup>H NMR (400 MHz, CDCl<sub>3</sub>) δ 7.39 – 7.28 (m, 15H), 4.94 (d, *J* = 11.1 Hz, 1H), 4.69 (t, *J* = 7.0 Hz, 1H, H-1), 4.66 (d, *J* = 12.3 Hz, 1H), 4.58 (d, *J* = 12.3 Hz, 1H), 4.50 (d, *J* = 11.1 Hz, 1H), 4.28 (d, *J* = 9.5 Hz, 1H), 3.87 – 3.81 (m, 3H), 2.76 (d, *J* = 6.9 Hz, 2H); <sup>13</sup>C NMR (100 MHz, CDCl<sub>3</sub>) δ 205.84, 140.27, 138.44, 137.66, 128.77, 128.55, 128.53, 128.40, 128.31, 128.10, 127.85, 127.79, 125.83, 81.12, 79.92, 79.57, 73.75, 73.71, 69.44, 50.18. The <sup>1</sup>H/<sup>13</sup>C NMR spectroscopic data are coincide with the previous report.<sup>[1]</sup>

**(2R,3R,6R)-3-Benzyloxy-2-benzyloxymethyl-6-(4-bromophenyl)-tetrahydro-4H-pyran-4-one (4iβ):**

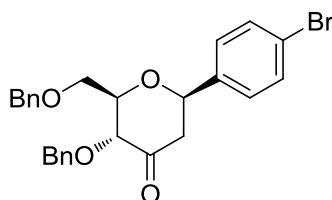

To a solution of **4ia** (10.0 mg, 0.021 mmol) in ether (Et<sub>2</sub>O) (1 mL) was added HBF<sub>4</sub> (75 μL, 50% V/V in Et<sub>2</sub>O), and the mixture was stirred at room temperature for 5 h. After the completion of the reaction, the mixture was diluted with saturated sodium bicarbonate solution (sat.NaHCO<sub>3</sub>, 10 mL) and the aqueous layer was extracted with ethyl acetate (10 mL \* 3). The combined organic layer was dried over Na<sub>2</sub>SO<sub>4</sub>. The solvent was evaporated to dryness. The residue was purified by column chromatography on silica gel (ethyl acetate/petroleum ether: 1/10) to afford **4iβ** as a white foam (5.1 mg, 51%). *R<sub>f</sub>* = 0.38 (ethyl acetate/petroleum ether: 1/6); [*a*]<sub>D</sub><sup>20</sup> = +133.6 (c 0.2, CHCl<sub>3</sub>); <sup>1</sup>H NMR (400 MHz, CDCl<sub>3</sub>) δ 7.50 (d, *J* = 8.4 Hz, 2H), 7.35 – 7.24 (m, 12H), 4.93 (d, *J* = 11.1 Hz, 1H), 4.65 (dd, *J* = 11.1, 3.3 Hz, 1H, H-1, <sup>4</sup>C<sub>1</sub> (D, β)), 4.57 (d, *J* = 12.2 Hz, 1H), 4.49 (d, *J* = 11.1 Hz, 1H), 4.27 – 4.23 (m, 1H), 3.86 –

3.78 (m, 1H), 2.77 – 2.65 (m, 1H);  $^{13}\text{C}$  NMR (100 MHz,  $\text{CDCl}_3$ )  $\delta$  205.43, 139.19, 138.22, 137.45, 131.86, 128.55, 128.54, 128.39, 128.14, 127.85, 127.50, 122.16, 80.93, 79.67, 78.76, 73.69, 73.67, 69.22, 49.94; HMRS (ESI) calcd for  $\text{C}_{26}\text{H}_{25}\text{O}_4\text{NaBr}$   $[\text{M} + \text{Na}]^+$  503.0828, found 503.0826.

**(2R,3R,6R)-3-Benzoyloxy-2-benzoyloxymethyl-6-(4-nitrophenyl)-tetrahydro-4H-pyran-4-one (4j $\beta$ ):**

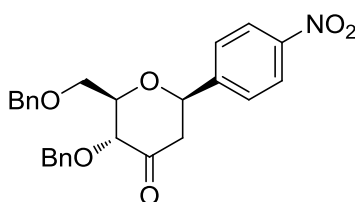

To a solution of **4j $\alpha$**  (10.0 mg, 0.022 mmol) in ether ( $\text{Et}_2\text{O}$ ) (1 mL) was added  $\text{HBF}_4$  (50  $\mu\text{L}$ , 50% V/V in  $\text{Et}_2\text{O}$ ), and the mixture was stirred at room temperature for 5 h. After the completion of the reaction, the mixture was diluted with saturated sodium bicarbonate solution (sat.  $\text{NaHCO}_3$ , 10 mL) and the aqueous layer was extracted with ethyl acetate (10 mL \* 3). The combined organic layer was dried over  $\text{Na}_2\text{SO}_4$ . The solvent was evaporated to dryness. The residue was purified by column chromatography on silica gel (ethyl acetate/petroleum ether: 1/6) to afford **4j $\beta$**  as a white foam (6.3 mg, 63%).  $R_f$  = 0.30 (ethyl acetate/petroleum ether: 1/3);  $[\alpha]_D^{19}$  = +137.8 (c 0.2,  $\text{CHCl}_3$ );  $^1\text{H}$  NMR (400 MHz,  $\text{CDCl}_3$ )  $\delta$  8.24 (d,  $J$  = 8.8 Hz, 2H), 7.56 (d,  $J$  = 8.7 Hz, 2H), 7.38 – 7.28 (m, 10H), 4.95 (d,  $J$  = 11.1 Hz, 1H), 4.80 (dd,  $J$  = 11.6, 2.5 Hz, 1H, H-1),  $^4\text{C}_1$  (D,  $\beta$ )), 4.65 (d,  $J$  = 12.2 Hz, 1H), 4.58 (d,  $J$  = 12.2 Hz, 1H), 4.51 (d,  $J$  = 11.1 Hz, 1H), 4.28 (d,  $J$  = 9.3 Hz, 1H, H-4), 3.89 – 3.82 (m, 3H), 2.81 (dd,  $J$  = 13.8, 2.6 Hz, 1H), 2.68 (ddd,  $J$  = 13.8, 11.7, 0.9 Hz, 1H);  $^{13}\text{C}$  NMR (100 MHz,  $\text{CDCl}_3$ )  $\delta$  204.70, 147.80, 147.16, 138.11, 137.35, 128.59, 128.42, 128.23, 127.95, 127.87, 126.53, 124.03, 80.96, 79.54, 78.16, 73.78, 73.72, 69.16, 49.71; HMRS (ESI) calcd for  $\text{C}_{26}\text{H}_{29}\text{O}_6\text{N}_2$   $[\text{M} + \text{NH}_4]^+$  465.2021, found 465.2018.

**(2R,3R,6R)-3-Benzoyloxy-2-benzoyloxymethyl-6-(4-ethoxyphenyl)-tetrahydro-4H-pyran-4-one (4k $\beta$ ):**

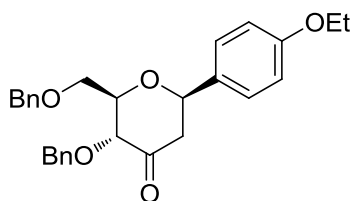

To a solution of **4kα** (10.0 mg, 0.022 mmol) in ether (Et<sub>2</sub>O) (1 mL) was added HBF<sub>4</sub> (50 μL, 50% V/V in Et<sub>2</sub>O), and the mixture was stirred at room temperature for 1 h. After the completion of the reaction, the mixture was diluted with saturated sodium bicarbonate solution (sat.NaHCO<sub>3</sub>, 10 mL) and the aqueous layer was extracted with ethyl acetate (10 mL \* 3). The combined organic layer was dried over Na<sub>2</sub>SO<sub>4</sub>. The solvent was evaporated to dryness. The residue was purified by column chromatography on silica gel (ethyl acetate/petroleum ether: 1/10) to afford **4kβ** as a white foam (9.0 mg, 90%). *R<sub>f</sub>* = 0.25 (ethyl acetate/petroleum ether: 1/6); [*a*]<sub>D</sub><sup>20</sup> = +123.6 (c 0.1, CHCl<sub>3</sub>); <sup>1</sup>H NMR (400 MHz, CDCl<sub>3</sub>) δ 7.35 – 7.27 (m, 12H), 6.89 (d, *J* = 8.7 Hz, 2H), 4.94 (d, *J* = 11.1 Hz, 1H), 4.65 (d, *J* = 12.2 Hz, 1H), 4.61 (dd, *J* = 10.8, 2.9 Hz, 1H, H-1, <sup>4</sup>C<sub>1</sub> (D, β)), 4.56 (d, *J* = 12.2 Hz, 1H), 4.49 (d, *J* = 11.1 Hz, 1H), 4.27 (d, *J* = 8.8 Hz, 1H), 4.03 (q, *J* = 7.0 Hz, 2H), 3.84 – 3.80 (m, 3H), 2.81 – 2.74 (m, 1H), 2.71 (dd, *J* = 13.8, 3.0 Hz, 1H), 1.41 (t, *J* = 7.0 Hz, 3H); <sup>13</sup>C NMR (100 MHz, CDCl<sub>3</sub>) δ 206.12, 159.00, 138.35, 137.60, 132.18, 128.54, 128.52, 128.39, 128.09, 127.87, 127.78, 127.22, 114.67, 80.96, 79.87, 79.38, 73.68, 73.66, 69.33, 63.64, 50.10, 14.95; HMRS (ESI) calcd for C<sub>28</sub>H<sub>31</sub>O<sub>5</sub> [*M* + *H*]<sup>+</sup> 447.2166, found 447.2167.

**(2R,3R,6R)-3-Benzyloxy-2-benzyloxymethyl-6-(4-hydroxy-2-nitrophenyl)-tetrahydro-4H-pyran-4-one (4lβ):**

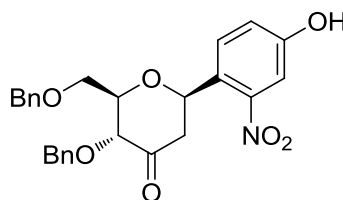

To a solution of **4lα** (10.0 mg, 0.022 mmol) in ether (Et<sub>2</sub>O) (1 mL) was added HBF<sub>4</sub> (50 μL, 50% V/V in Et<sub>2</sub>O), and the mixture was stirred at room temperature for 5 h. After the completion of the reaction, the mixture was diluted with saturated sodium bicarbonate solution (sat.NaHCO<sub>3</sub>, 10 mL) and the aqueous layer was extracted with



ethyl acetate (10 mL \* 3). The combined organic layer was dried over Na<sub>2</sub>SO<sub>4</sub>. The solvent was evaporated to dryness. The residue was purified by column chromatography on silica gel (ethyl acetate/petroleum ether: 1/3) to afford **4lβ** as a white foam (6.2 mg, 62%). *R<sub>f</sub>* = 0.25 (ethyl acetate/petroleum ether: 1/3); [*a*]<sub>D</sub><sup>20</sup> = +277.1 (c 0.2, CHCl<sub>3</sub>); <sup>1</sup>H NMR (400 MHz, CDCl<sub>3</sub>) δ 7.35 – 7.27 (m, 11H), 7.12 (s, 1H, -OH), 7.08 (s, 1H), 6.79 (d, *J* = 7.5 Hz, 1H), 5.12 (d, *J* = 10.5 Hz, 1H, H-1, <sup>4</sup>C<sub>1</sub> (D, β)), 4.97 (d, *J* = 11.2 Hz, 1H, Bn), 4.61 (d, *J* = 11.9 Hz, 1H, Bn), 4.54 (d, *J* = 11.8 Hz, 1H, Bn), 4.46 (d, *J* = 11.1 Hz, 1H, Bn), 4.07 (d, *J* = 9.9 Hz, 1H, H-4), 3.91 – 3.83 (m, 2H, H-5, H-6a), 3.77 (dd, *J* = 10.8, 5.4 Hz, 1H, H-6b), 2.93 (d, *J* = 13.5 Hz, 1H, H-2a), 2.72 – 2.63 (m, 1H, H-2b); <sup>13</sup>C NMR (100 MHz, CDCl<sub>3</sub>) δ 204.70, 156.40, 148.10, 137.37, 136.89, 128.73, 128.63, 128.45, 128.39, 128.25, 125.83, 120.62, 111.40, 79.88, 79.46, 74.75, 73.93, 73.69, 69.68, 48.43; HMRS (ESI) calcd for C<sub>26</sub>H<sub>25</sub>O<sub>7</sub>NNa [M + Na]<sup>+</sup> 486.1524, found 486.1525.

**(2S,3S,6S)-3-Benzoyloxy-2-methyl-6-(4-acetylphenyl)-tetrahydro-4H-pyran-4-one (4mβ):**

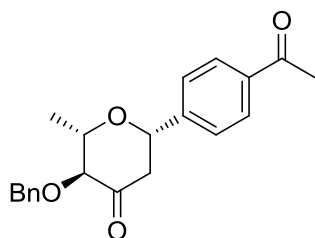

To a solution of **4ma** (10.0 mg, 0.029 mmol) in ether (Et<sub>2</sub>O) (1 mL) was added HBF<sub>4</sub> (50 μL, 50% V/V in Et<sub>2</sub>O), and the mixture was stirred at room temperature for 5 h. After the completion of the reaction, the mixture was diluted with saturated sodium bicarbonate solution (sat.NaHCO<sub>3</sub>, 10 mL) and the aqueous layer was extracted with ethyl acetate (10 mL \* 3). The combined organic layer was dried over Na<sub>2</sub>SO<sub>4</sub>. The solvent was evaporated to dryness. The residue was purified by column chromatography on silica gel (ethyl acetate/petroleum ether: 1/5) to afford **4mβ** as a white foam (6.0 mg, 60%). *R<sub>f</sub>* = 0.36 (ethyl acetate/petroleum ether: 1/3); [*a*]<sub>D</sub><sup>20</sup> = -235.8 (c 0.1, CHCl<sub>3</sub>); <sup>1</sup>H NMR (400 MHz, CDCl<sub>3</sub>) δ 7.96 (d, *J* = 8.3 Hz, 2H), 7.46 (d, *J* = 8.2 Hz, 2H), 7.43 – 7.31 (m, 5H), 5.00 (d, *J* = 11.4 Hz, 1H), 4.74 (dd, *J* = 11.4, 2.5

Hz, 1H, H-1,  $^1\text{C}_4$  (L,  $\beta$ )), 4.55 (d,  $J = 11.4$  Hz, 1H), 3.85 – 3.76 (m, 1H), 2.77 (dd,  $J = 13.7, 2.6$  Hz, 1H), 2.71 – 2.64 (m, 1H), 2.60 (s, 3H), 1.48 (d,  $J = 5.3$  Hz, 3H);  $^{13}\text{C}$  NMR (100 MHz,  $\text{CDCl}_3$ )  $\delta$  204.96, 197.75, 145.37, 137.43, 136.94, 128.87, 128.62, 128.46, 128.23, 125.85, 84.84, 78.60, 77.94, 73.50, 50.02, 26.81, 19.46; HMRS (ESI) calcd for  $\text{C}_{21}\text{H}_{23}\text{O}_4$   $[\text{M} + \text{H}]^+$  339.1591, found 339.1599.

**(2S,3S,6S)-3-Benzyloxy-2-methyl-6-phenyl-tetrahydro-4H-pyran-4-one (4n $\beta$ ):**

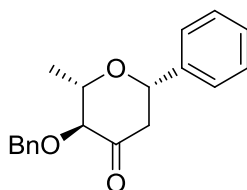

To a solution of **4n $\alpha$**  (10.0 mg, 0.034 mmol) in ether ( $\text{Et}_2\text{O}$ ) (1 mL) was added  $\text{HBF}_4$  (75  $\mu\text{L}$ , 50% V/V in  $\text{Et}_2\text{O}$ ), and the mixture was stirred at room temperature for 5 h. After the completion of the reaction, the mixture was diluted with saturated sodium bicarbonate solution (sat.  $\text{NaHCO}_3$ , 10 mL) and the aqueous layer was extracted with ethyl acetate (10 mL \* 3). The combined organic layer was dried over  $\text{Na}_2\text{SO}_4$ . The solvent was evaporated to dryness. The residue was purified by column chromatography on silica gel (ethyl acetate/petroleum ether: 1/10) to afford **4n $\beta$**  as a white foam (4.5 mg, 45%).  $R_f = 0.43$  (ethyl acetate/petroleum ether: 1/6);  $[\alpha]_D^{18} = -86.7$  (c 0.1,  $\text{CHCl}_3$ );  $^1\text{H}$  NMR (400 MHz,  $\text{CDCl}_3$ )  $\delta$  7.42 – 7.29 (m, 10H), 5.00 (d,  $J = 11.4$  Hz, 1H), 4.67 (dd,  $J = 8.5, 5.6$  Hz, 1H, H-1), 4.55 (d,  $J = 11.4$  Hz, 1H), 3.82 – 3.74 (m, 2H), 2.77 – 2.69 (m, 2H), 1.46 (d,  $J = 5.4$  Hz, 3H);  $^{13}\text{C}$  NMR (100 MHz,  $\text{CDCl}_3$ )  $\delta$  205.51, 140.33, 137.63, 128.81, 128.61, 128.45, 128.33, 128.18, 125.82, 85.08, 79.35, 77.90, 73.49, 50.24, 19.50; HMRS (ESI) calcd for  $\text{C}_{19}\text{H}_{20}\text{O}_3\text{Na}$   $[\text{M} + \text{Na}]^+$  319.1305, found 319.1310.

**(2S,3S,6S)-3-Benzyloxy-2-methyl-6-(4-bromophenyl)-tetrahydro-4H-pyran-4-one (4o $\beta$ ):**

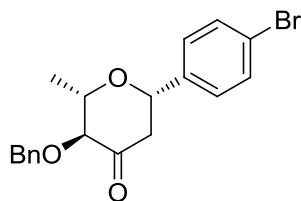

To a solution of **40a** (10.0 mg, 0.027 mmol) in ether (Et<sub>2</sub>O) (1 mL) was added HBF<sub>4</sub> (75  $\mu$ L, 50% V/V in Et<sub>2</sub>O), and the mixture was stirred at room temperature for 5 h. After the completion of the reaction, the mixture was diluted with saturated sodium bicarbonate solution (sat.NaHCO<sub>3</sub>, 10 mL) and the aqueous layer was extracted with ethyl acetate (10 mL \* 3). The combined organic layer was dried over Na<sub>2</sub>SO<sub>4</sub>. The solvent was evaporated to dryness. The residue was purified by column chromatography on silica gel (ethyl acetate/petroleum ether: 1/10) to afford **40b** as a white foam (4.2 mg, 42%).  $R_f$  = 0.43 (ethyl acetate/petroleum ether: 1/6);  $[\alpha]_D^{19}$  = -125.9 (c 0.1, CHCl<sub>3</sub>); <sup>1</sup>H NMR (400 MHz, CDCl<sub>3</sub>)  $\delta$  7.51 – 7.47 (m, 2H), 7.42 – 7.30 (m, 5H), 7.24 (d,  $J$  = 8.4 Hz, 2H), 4.99 (d,  $J$  = 11.4 Hz, 1H), 4.64 (dd,  $J$  = 11.0, 3.1 Hz, 1H, H-1, <sup>1</sup>C<sub>4</sub> (L,  $\beta$ )), 4.54 (d,  $J$  = 11.4 Hz, 1H), 3.83 – 3.74 (m, 2H), 2.73 (dd,  $J$  = 13.7, 3.1 Hz, 1H), 2.67 (dd,  $J$  = 13.5, 11.1 Hz, 1H), 1.46 (d,  $J$  = 5.4 Hz, 3H); <sup>13</sup>C NMR (100 MHz, CDCl<sub>3</sub>)  $\delta$  205.13, 139.34, 137.47, 131.92, 128.63, 128.47, 128.23, 127.49, 122.19, 84.88, 78.57, 77.89, 76.84, 73.50, 50.09, 19.47; HMRS (ESI) calcd for HMRS (ESI) calcd for C<sub>19</sub>H<sub>19</sub>O<sub>3</sub>BrNa [M + Na]<sup>+</sup> 397.0405, found 397.0409.

**(2S,3S,6S)-3-Benzyloxy-2-methyl-6-(3-nitrophenyl)-tetrahydro-4H-pyran-4-one (4p $\beta$ ):**

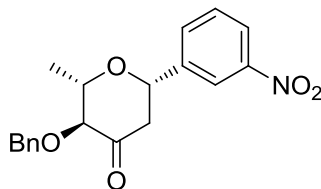

To a solution of **4pa** (10.0 mg, 0.029 mmol) in ether (Et<sub>2</sub>O) (1 mL) was added HBF<sub>4</sub> (50  $\mu$ L, 50% V/V in Et<sub>2</sub>O), and the mixture was stirred at room temperature for 3 h. After the completion of the reaction, the mixture was diluted with saturated sodium bicarbonate solution (sat.NaHCO<sub>3</sub>, 10 mL) and the aqueous layer was extracted with ethyl acetate (10 mL \* 3). The combined organic layer was dried over Na<sub>2</sub>SO<sub>4</sub>. The

solvent was evaporated to dryness. The residue was purified by column chromatography on silica gel (ethyl acetate/petroleum ether: 1/5) to afford **4p $\beta$**  as a white foam (6.5 mg, 65%).  $R_f$  = 0.48 (ethyl acetate/petroleum ether: 1/3);  $[\alpha]_D^{20}$  = -104.5 (c 0.2, CHCl<sub>3</sub>); <sup>1</sup>H NMR (400 MHz, CDCl<sub>3</sub>)  $\delta$  8.29 (t,  $J$  = 1.8 Hz, 1H), 8.18 (ddd,  $J$  = 8.1, 2.2, 1.0 Hz, 1H), 7.66 (d,  $J$  = 7.7 Hz, 1H), 7.55 (t,  $J$  = 7.9 Hz, 1H), 7.43 – 7.31 (m, 5H), 5.00 (d,  $J$  = 11.4 Hz, 1H), 4.79 (dd,  $J$  = 11.6, 2.5 Hz, 1H, H-1, <sup>1</sup>C<sub>4</sub> (L,  $\beta$ )), 4.56 (d,  $J$  = 11.4 Hz, 1H), 3.88 – 3.76 (m, 2H), 2.81 (dd,  $J$  = 13.7, 2.6 Hz, 1H), 2.73 – 2.64 (m, 1H), 1.49 (d,  $J$  = 5.5 Hz, 3H); <sup>13</sup>C NMR (100 MHz, CDCl<sub>3</sub>)  $\delta$  204.47, 148.63, 142.43, 137.34, 131.82, 129.79, 128.66, 128.50, 128.30, 123.23, 120.89, 84.70, 78.00, 77.87, 73.57, 49.92, 19.43; HMRS (ESI) calcd for C<sub>19</sub>H<sub>23</sub>O<sub>5</sub>N<sub>2</sub> [M + NH<sub>4</sub>]<sup>+</sup> 359.1602, found 359.1603.

**(2S,3S,6S)-3-Benzoyloxy-2-methyl-6-(3-carboxyphenyl)-tetrahydro-4H-pyran-4-one (4q $\beta$ ):**

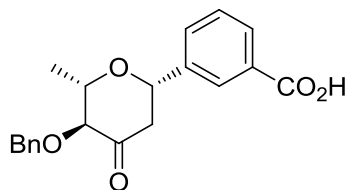

To a solution of **4q $\alpha$**  (10.0 mg, 0.029 mmol) in ether (Et<sub>2</sub>O) (1 mL) was added HBF<sub>4</sub> (75  $\mu$ L, 50% V/V in Et<sub>2</sub>O), and the mixture was stirred at room temperature for 5 h. After the completion of the reaction, the mixture was diluted with brine (10 mL) and the aqueous layer was extracted with ethyl acetate (10 mL \* 3). The combined organic layer was dried over Na<sub>2</sub>SO<sub>4</sub>. The solvent was evaporated to dryness. The residue was purified by column chromatography on silica gel (MeOH/DCM: 1/20) to afford **4q $\beta$**  as a white foam (5.2 mg, 52%).  $R_f$  = 0.24 (MeOH/DCM: 1/20);  $[\alpha]_D^{20}$  = -48.0 (c 0.1, CHCl<sub>3</sub>); <sup>1</sup>H NMR (400 MHz, CDCl<sub>3</sub>)  $\delta$  8.12 (s, 1H), 8.07 (d,  $J$  = 7.8 Hz, 1H), 7.62 (d,  $J$  = 7.7 Hz, 1H), 7.49 (t,  $J$  = 7.7 Hz, 1H), 7.42 – 7.32 (m, 5H), 5.00 (d,  $J$  = 11.4 Hz, 1H, Bn), 4.75 (dd,  $J$  = 10.9, 3.1 Hz, 1H, H-1, <sup>1</sup>C<sub>4</sub> (L,  $\beta$ )), 4.56 (d,  $J$  = 11.4 Hz, 1H, Bn), 3.85 – 3.78 (m, 2H, H-4, H-5), 2.80 (dd,  $J$  = 13.7, 3.2 Hz, 1H, H-2a), 2.74 (dd,  $J$  = 13.6, 11.1 Hz, 1H, H-2b), 1.48 (d,  $J$  = 5.3 Hz, 3H, H-6); <sup>13</sup>C NMR (100 MHz, CDCl<sub>3</sub>)  $\delta$  205.03

(C-3), 170.78 (-CO<sub>2</sub>H), 141.02, 137.52, 131.22, 130.10, 129.82, 129.07, 128.64, 128.49, 128.24, 127.61, 84.94, 78.66, 78.00, 73.56 (Ph-CH<sub>2</sub>-), 50.07, 19.47 (C-6); HMRS (ESI) calcd for C<sub>20</sub>H<sub>24</sub>O<sub>5</sub>N [M + NH<sub>4</sub>]<sup>+</sup> 358.1649, found 358.1652.

**(2S,3S,6S)-3-Benzyloxy-2-methyl-6-(1-naphthyl)-tetrahydro-4H-pyran-4-one (4rβ):**

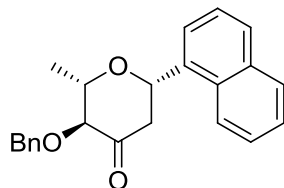

To a solution of **4ra** (10.0 mg, 0.029 mmol) in ether (Et<sub>2</sub>O) (1 mL) was added HBF<sub>4</sub> (75 μL, 50% V/V in Et<sub>2</sub>O), and the mixture was stirred at room temperature for 2.5 h. After the completion of the reaction, the mixture was diluted with saturated sodium bicarbonate solution (sat. NaHCO<sub>3</sub>, 10 mL) and the aqueous layer was extracted with ethyl acetate (10 mL \* 3). The combined organic layer was dried over Na<sub>2</sub>SO<sub>4</sub>. The solvent was evaporated to dryness. The residue was purified by column chromatography on silica gel (ethyl acetate/petroleum ether: 1/10) to afford **4rβ** as a white foam (4.1 mg, 41%). R<sub>f</sub> = 0.35 (ethyl acetate/petroleum ether: 1/6); [α]<sub>D</sub><sup>20</sup> = -167.8 (c 0.1, CHCl<sub>3</sub>); <sup>1</sup>H NMR (400 MHz, CDCl<sub>3</sub>) δ 7.95 (d, *J* = 8.3 Hz, 1H), 7.89 – 7.86 (m, 1H), 7.82 (d, *J* = 8.2 Hz, 1H), 7.67 (d, *J* = 7.1 Hz, 1H), 7.57 – 7.47 (m, 3H), 7.45 – 7.33 (m, 5H), 5.39 (dd, *J* = 10.6, 3.4 Hz, 1H, H-1, <sup>1</sup>C<sub>4</sub> (L, β)), 5.04 (d, *J* = 11.5 Hz, 1H), 4.59 (d, *J* = 11.5 Hz, 1H), 4.00 – 3.92 (m, 1H), 3.87 (d, *J* = 8.7 Hz, 1H), 2.98 – 2.87 (m, 2H), 1.53 (d, *J* = 5.9 Hz, 3H); <sup>13</sup>C NMR (100 MHz, CDCl<sub>3</sub>) δ 205.77, 137.61, 135.74, 133.90, 130.09, 129.12, 128.90, 128.63, 128.46, 128.20, 126.63, 125.91, 125.59, 123.14, 122.88, 85.19, 78.16, 76.47, 73.51, 49.36, 19.64; HMRS (ESI) calcd for C<sub>23</sub>H<sub>22</sub>O<sub>3</sub>Na [M + Na]<sup>+</sup> 369.1462, found 369.1467.

**(2S,3S,6S)-3-Benzyloxy-2-methyl-6-(2-methyl-5-fluorophenyl)-tetrahydro-4H-pyran-4-one (4sβ):**

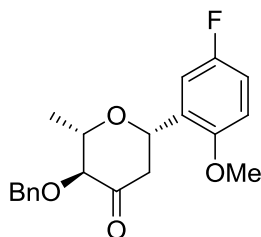

To a solution of **4sa** (10.0 mg, 0.058 mmol) in ether (Et<sub>2</sub>O) (1 mL) was added HBF<sub>4</sub> (75  $\mu$ L, 50% V/V in Et<sub>2</sub>O), and the mixture was stirred at room temperature for 3 h. After the completion of the reaction, the mixture was diluted with saturated sodium bicarbonate solution (sat. NaHCO<sub>3</sub>, 10 mL) and the aqueous layer was extracted with ethyl acetate (10 mL \* 3). The combined organic layer was dried over Na<sub>2</sub>SO<sub>4</sub>. The solvent was evaporated to dryness. The residue was purified by column chromatography on silica gel (ethyl acetate/petroleum ether: 1/10) to afford **4s $\beta$**  as a white foam (4.5 mg, 45%).  $R_f$  = 0.39 (ethyl acetate/petroleum ether: 1/6);  $[\alpha]_D^{20}$  = -106.0 (c 0.1, CHCl<sub>3</sub>); <sup>1</sup>H NMR (400 MHz, CDCl<sub>3</sub>)  $\delta$  7.42 – 7.30 (m, 5H), 7.24 (dd,  $J$  = 9.2, 3.1 Hz, 1H), 6.96 – 6.90 (m, 1H), 6.77 (dd,  $J$  = 9.0, 4.3 Hz, 1H), 5.00 (d,  $J$  = 11.6 Hz, 1H), 4.95 (dd,  $J$  = 11.5, 2.2 Hz, 1H, H-1, <sup>1</sup>C<sub>4</sub> (L,  $\beta$ )), 4.54 (d,  $J$  = 11.6 Hz, 1H), 3.79 (s, 3H), 3.82 – 3.72 (m, 2H), 2.87 (dd,  $J$  = 13.7, 2.3 Hz, 1H), 2.44 (ddd,  $J$  = 13.6, 11.5, 1.0 Hz, 1H), 1.46 (d,  $J$  = 5.7 Hz, 3H); <sup>13</sup>C NMR (100 MHz, CDCl<sub>3</sub>)  $\delta$  205.63,  $\delta$  157.46 (d,  $J$  = 238.4 Hz), 151.52, 137.64, 130.80 (d,  $J$  = 7.1 Hz), 128.60, 128.44, 128.16, 114.60 (d,  $J$  = 23.0 Hz), 113.17 (d,  $J$  = 24.8 Hz), 111.26 (d,  $J$  = 8.1 Hz), 84.99, 77.68, 73.48, 73.44, 55.92, 48.66, 19.51; <sup>19</sup>F NMR (376 MHz, CDCl<sub>3</sub>)  $\delta$  -123.03; HMRS (ESI) calcd for C<sub>20</sub>H<sub>21</sub>O<sub>4</sub>F [M + Na]<sup>+</sup> 367.1317, found 367.1308.

**(2S,3S,6S)-3-Benzyloxy-2-methyl-6-(3,5-bis-trifluoromethylphenyl)-tetrahydro-4H-pyran-4-one (4t $\beta$ ):**

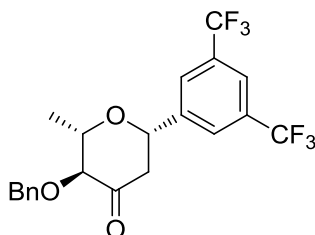

To a solution of **4ta** (10.0 mg, 0.023 mmol) in ether (Et<sub>2</sub>O) (1 mL) was added HBF<sub>4</sub> (75  $\mu$ L, 50% V/V in Et<sub>2</sub>O), and the mixture was stirred at room temperature for 5 h.

After the completion of the reaction, the mixture was diluted with saturated sodium bicarbonate solution (sat.NaHCO<sub>3</sub>, 10 mL) and the aqueous layer was extracted with ethyl acetate (10 mL \* 3). The combined organic layer was dried over Na<sub>2</sub>SO<sub>4</sub>. The solvent was evaporated to dryness. The residue was purified by column chromatography on silica gel (ethyl acetate/petroleum ether: 1/10) to afford **4tβ** as a white foam (3.6 mg, 36%). *R<sub>f</sub>* = 0.37 (ethyl acetate/petroleum ether: 1/6); [*a*]<sub>D</sub><sup>20</sup> = -94.2 (c 0.2, CHCl<sub>3</sub>); <sup>1</sup>H NMR (400 MHz, CDCl<sub>3</sub>) δ 7.89 – 7.78 (m, 3H), 7.43 – 7.32 (m, 5H), 5.00 (d, *J* = 11.4 Hz, 1H), 4.80 (dd, *J* = 11.7, 2.4 Hz, 1H, H-1, <sup>1</sup>C<sub>4</sub> (L, β)), 4.56 (d, *J* = 11.4 Hz, 1H), 3.87 – 3.77 (m, 2H), 2.82 (dd, *J* = 13.7, 2.6 Hz, 1H), 2.72 – 2.62 (m, 1H), 1.49 (d, *J* = 5.5 Hz, 3H); <sup>13</sup>C NMR (100 MHz, CDCl<sub>3</sub>) δ 204.12, 142.87, 137.30, 132.21 (q, *J* = 32.1 Hz), 128.68, 128.51, 128.34, 126.93 – 126.89 (m), 123.28 (q, *J* = 272.9 Hz), 122.31 – 122.21 (m), 84.60, 78.09, 77.67, 73.60, 49.89, 19.39; <sup>19</sup>F NMR (376 MHz, CDCl<sub>3</sub>) δ -62.85 (s, 6F); HMRS (ESI) calcd for C<sub>22</sub>H<sub>19</sub>O<sub>5</sub>F<sub>6</sub> [M + HCO<sub>2</sub>]<sup>-</sup> 477.1143, found 477.1144.

**(2S,3S,6S)-3-Benzoyloxy-2-methyl-6-(4-biphenyl)-tetrahydro-4H-pyran-4-one**  
**(4uβ):**

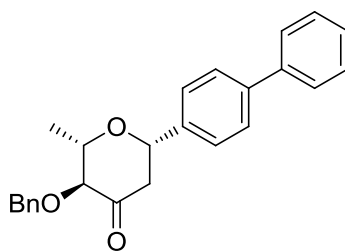

To a solution of **4uα** (10.0 mg, 0.027 mmol) in ether (Et<sub>2</sub>O) (1 mL) was added HBF<sub>4</sub> (50 μL, 50% V/V in Et<sub>2</sub>O), and the mixture was stirred at room temperature for 5 h. After the completion of the reaction, the mixture was diluted with saturated sodium bicarbonate solution (sat.NaHCO<sub>3</sub>, 10 mL) and the aqueous layer was extracted with ethyl acetate (10 mL \* 3). The combined organic layer was dried over Na<sub>2</sub>SO<sub>4</sub>. The solvent was evaporated to dryness. The residue was purified by column chromatography on silica gel (ethyl acetate/petroleum ether: 1/10) to afford **4uβ** as a white foam (3.5 mg, 35%). *R<sub>f</sub>* = 0.33 (ethyl acetate/petroleum ether: 1/6); [*a*]<sub>D</sub><sup>20</sup> = -76.4

(c 0.1, CHCl<sub>3</sub>); <sup>1</sup>H NMR (400 MHz, CDCl<sub>3</sub>) δ 7.58 (t, *J* = 8.1 Hz, 4H), 7.47 – 7.32 (m, 10H), 5.01 (d, *J* = 11.4 Hz, 1H), 4.72 (t, *J* = 7.1 Hz, 1H, H-1), 4.56 (d, *J* = 11.4 Hz, 1H), 3.87 – 3.76 (m, 2H), 2.79 (d, *J* = 6.6 Hz, 2H), 1.48 (d, *J* = 5.6 Hz, 3H); <sup>13</sup>C NMR (100 MHz, CDCl<sub>3</sub>) δ 205.54, 141.37, 140.79, 139.23, 137.57, 128.95, 128.62, 128.47, 128.20, 127.59, 127.27, 126.32, 85.05, 79.16, 77.94, 73.49, 50.13, 19.53; HMRS (ESI) calcd for C<sub>25</sub>H<sub>24</sub>O<sub>3</sub>Na [M + Na]<sup>+</sup> 395.1617, found 395.1612.

**(4R,5S,E)-4,6-Di(benzyloxy)-5-hydroxy-1-(4-bromophenyl)-3-oxo-1-hexene (6):**

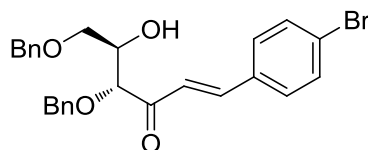

To a solution of **4ia** (10.0 mg, 0.021 mmol) in ether (Et<sub>2</sub>O) (1 mL) was added HBF<sub>4</sub> (75 μL, 50% V/V in Et<sub>2</sub>O), and the mixture was stirred at room temperature for 5 h. After the completion of the reaction, the mixture was diluted with saturated sodium bicarbonate solution (sat. NaHCO<sub>3</sub>, 10 mL) and the aqueous layer was extracted with ethyl acetate (10 mL \* 3). The combined organic layer was dried over Na<sub>2</sub>SO<sub>4</sub>. The solvent was evaporated to dryness. The residue was purified by column chromatography on silica gel (ethyl acetate/petroleum ether: 1/10) to afford **6h** as a white foam (2.5 mg, 25%). *R<sub>f</sub>* = 0.13 (ethyl acetate/petroleum ether: 1/6); [*a*]<sub>D</sub><sup>20</sup> = 0 (c 0.2, CHCl<sub>3</sub>); <sup>1</sup>H NMR (400 MHz, CDCl<sub>3</sub>) δ 7.62 (d, *J* = 16.0 Hz, 1H, Ph-*HC*=CH), 7.51 (d, *J* = 8.5 Hz, 2H), 7.38 (d, *J* = 8.5 Hz, 2H), 7.35 – 7.27 (m, 10H), 7.13 (d, *J* = 16.0 Hz, 1H, Ph-*HC*=CH-CO), 4.64 (d, *J* = 11.6 Hz, 1H, Bn), 4.54 (d, *J* = 11.8 Hz, 1H, Bn), 4.50 (d, *J* = 11.8 Hz, 2H, Bn), 4.16 – 4.10 (m, 2H, H-4, H-5), 3.69 – 3.61 (m, 2H, H-6a,b), 2.63 (br, 1H, -OH); <sup>13</sup>C NMR (100 MHz, CDCl<sub>3</sub>) δ 199.60, 142.55, 137.82, 137.13, 133.60, 132.29, 130.10, 128.70, 128.56, 128.34, 127.96, 125.15, 122.14, 84.14, 73.59, 73.19, 71.41, 70.31. HMRS (ESI) calcd for C<sub>26</sub>H<sub>26</sub>O<sub>4</sub>Br [M + H]<sup>+</sup> 481.1009, found 481.1011.

**(2S,3S,4S,6S)-3-Benzyloxy-4-hydroxy-2-methyl-6-(4-methoxyphenyl)-tetrahydro-4H-pyran (7):**



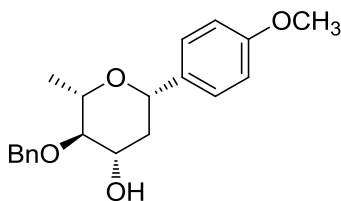

To the solution of **4fb** (20.0 mg, 0.06 mmol) in THF (2 mL) was added NaBH<sub>4</sub> (0.6 mmol). Then, the mixture was stirred for 1 h. The solution was taken up in 20 mL of sat. NH<sub>4</sub>Cl, then it was extracted with ethyl acetate (3\*20 mL). The organic layer was dried over Na<sub>2</sub>SO<sub>4</sub>, and the solvent was removed under rotary evaporation. The residue was purified through silica (petroleum ether/ethyl acetate: 3/1) to afford a colorless oil **7** (8.5 mg, 42%), *R<sub>f</sub>* = 0.24 (ethyl acetate/petroleum ether: 1/3) and **8** (8.0 mg, 40%), *R<sub>f</sub>* = 0.26 (ethyl acetate/petroleum ether: 1/3). For compound **7**,  $[\alpha]_D^{26} = -86.4$  (c 0.08, CHCl<sub>3</sub>); <sup>1</sup>H NMR (400 MHz, CDCl<sub>3</sub>) δ 7.39 (d, *J* = 4.4 Hz, 4H), 7.33 (dd, *J* = 8.5, 4.1 Hz, 1H), 7.28 (d, *J* = 8.6 Hz, 2H), 6.87 (d, *J* = 8.7 Hz, 2H), 4.83 (d, *J* = 11.3 Hz, 1H, Bn), 4.74 (d, *J* = 11.4 Hz, 1H, Bn), 4.41 (dd, *J* = 11.6, 1.6 Hz, 1H, H-1), 3.89 – 3.82 (m, 1H, H-3), 3.79 (s, 3H, -OMe), 3.51 (dq, *J* = 8.9, 6.2 Hz, 1H, H-5), 3.07 (t, *J* = 8.9 Hz, 1H, H-4), 2.23 – 2.18 (m, 1H, H-2a), 2.15 (s, 1H, -OH), 1.76 (dd, *J* = 24.3, 11.6 Hz, 1H, H-2b), 1.41 (d, *J* = 6.2 Hz, 3H, -Me); <sup>13</sup>C NMR (100 MHz, CDCl<sub>3</sub>) δ 159.33, 138.50, 133.70, 128.86, 128.23, 128.10, 127.48, 113.99, 86.64, 77.48, 75.66, 75.37, 73.02, 55.45, 40.96, 18.89. HMRS (ESI) calcd for C<sub>20</sub>H<sub>24</sub>O<sub>4</sub>Na [M + Na]<sup>+</sup> 351.1572, found 351.1569.

**(2S,3S,4R,6S)-3-Benzyloxy-4-hydroxy-2-methyl-6-(4-methoxyphenyl)-tetrahydro-2H-pyran (8):**

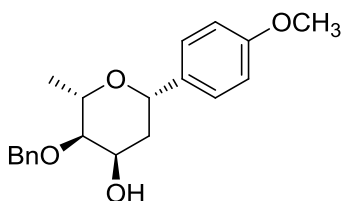

To the solution of **4fb** (20.0 mg, 0.06 mmol) in THF (2 mL) was added 1 M LiBHEt<sub>3</sub> (0.6 mL, 0.6 mmol) at 0 °C. Then, the mixture was stirred 0 °C for 24 h. The solution was taken up in 20 mL of sat. NH<sub>4</sub>Cl, and extracted with ethyl acetate (3\*20

mL). The organic layer was dried over Na<sub>2</sub>SO<sub>4</sub>, and the solvent was removed under rotary evaporation. The residue was purified through silica (petroleum ether/ethyl acetate: 3/1) to afford a colorless oil **8** (16.0 mg, 78%), *R<sub>f</sub>* = 0.26 (ethyl acetate/petroleum ether: 1/3).  $[\alpha]_D^{26} = -38.8$  (c 0.02, CHCl<sub>3</sub>); <sup>1</sup>H NMR (400 MHz, CDCl<sub>3</sub>) δ 7.41 – 7.33 (m, 5H), 7.28 (d, *J* = 8.6 Hz, 2H), 6.86 (d, *J* = 8.7 Hz, 2H), 4.79 (dd, *J* = 11.5, 1.5 Hz, 1H, H-1), 4.69 (d, *J* = 11.5 Hz, 1H, Bn), 4.58 (d, *J* = 11.5 Hz, 1H, Bn), 4.30 – 4.28 (m, 1H, H-3), 3.96 – 3.87 (m, 1H, H-5), 3.78 (s, 3H, -OMe), 3.21 (dd, *J* = 9.5, 3.0 Hz, 1H, H-4), 2.52 (s, 1H, -OH), 2.20 – 2.13 (m, 1H, H-2a), 1.80 (dd, *J* = 13.7, 12.2 Hz, 1H, H-2b), 1.31 (d, *J* = 6.2 Hz, 3H, -Me); <sup>13</sup>C NMR (100 MHz, CDCl<sub>3</sub>) δ 159.13, 137.81, 134.45, 128.74, 128.28, 128.13, 127.42, 113.93, 80.97, 72.91, 71.69, 70.81, 64.45, 55.43, 39.21, 18.81; HMRS (ESI) calcd for C<sub>20</sub>H<sub>24</sub>O<sub>4</sub>Na [M + Na]<sup>+</sup> 351.1572, found 351.1574.

**(2S,3S,4R,6S)-3-Benzoyloxy-4-dimethylamino-2-methyl-6-(4-methoxyphenyl)-tetrahydro-4H-pyran (9):**

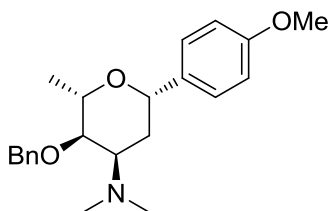

To the solution of **4fß** (50.0 mg, 0.15 mmol) and ammonium acetate (115.0 mg, 1.5 mmol) in methanol (4 mL) was added NaBH<sub>3</sub>CN (94.0 mg, 1.5 mmol) at room temperature. The mixture was stirred at room temperature for 24 h. The solution was taken up in 20 mL of water and extracted with ethyl acetate (3\*20 mL). The organic layer was dried over Na<sub>2</sub>SO<sub>4</sub>, and the solvent was removed under rotary evaporation. Then the residue was dissolved in acetonitrile (4 mL), and was added 45% aq. formaldehyde (1 mL) and NaBH<sub>3</sub>CN (47.0 mg, 7.5 mmol), the mixture was stirred at room temperature for 24 h. The resulting mixture was quenched with brine (20 mL) and the aqueous layer was extracted with ethyl acetate (3\* 20 ml). The organic layer was washed with water then dried over Na<sub>2</sub>SO<sub>4</sub>, and the solvent was removed under rotary evaporation. The residue was purified through silica gel (petroleum ether/ ethyl acetate:

3/1) to afford a colorless oil **9** (27.1 mg, 50%),  $R_f = 0.40$  (ethyl acetate/petroleum ether: 1/3);  $[\alpha]_D^{20} = -81.8$  (c 0.2,  $\text{CHCl}_3$ );  $^1\text{H}$  NMR (400 MHz,  $\text{CDCl}_3$ )  $\delta$  7.38 – 7.26 (m, 7H), 6.86 (d,  $J = 8.7$  Hz, 2H), 4.86 (dd,  $J = 11.1, 2.5$  Hz, 1H, H-1), 4.73 (d,  $J = 11.6$  Hz, 1H, Ph- $\text{CH}_2$ -), 4.51 (d,  $J = 11.6$  Hz, 1H, Ph- $\text{CH}_2$ -), 4.30 – 4.21 (m, 1H, H-5), 3.78 (s, 3H, MeO-), 3.43 (d,  $J = 6.2$  Hz, 1H, H-4), 2.75 (s, 1H, H-3), 2.44 (s, 6H, - $\text{NMe}_2$ ), 2.19 (ddd,  $J = 14.1, 4.8, 2.8$  Hz, 1H, H-2a), 1.80 – 1.71 (m, 1H, H-2b), 1.30 (d,  $J = 6.3$  Hz, 3H, Me-);  $^{13}\text{C}$  NMR (100 MHz,  $\text{CDCl}_3$ )  $\delta$  159.12, 138.40, 135.19, 128.51, 127.92, 127.40, 113.93, 83.95(br, -C- $\text{NMe}_2$ ), 73.27, 72.35, 71.66, 59.34, 55.44, 44.98, 37.22(br, C2), 19.24; HMRS (ESI) calcd for  $\text{C}_{22}\text{H}_{30}\text{O}_3\text{N}$   $[\text{M} + \text{H}]^+$  356.2220, found 356.2224.

## 8) Reference

[1] C.-F. Liu, D.-C. Xiong, X.-S. Ye, *J. Org. Chem.* **2014**, 79, 4676-4686.

## 9) Spectral data

$^1\text{H}$  NMR spectrum of **4aa**, 400MHz,  $\text{CDCl}_3$

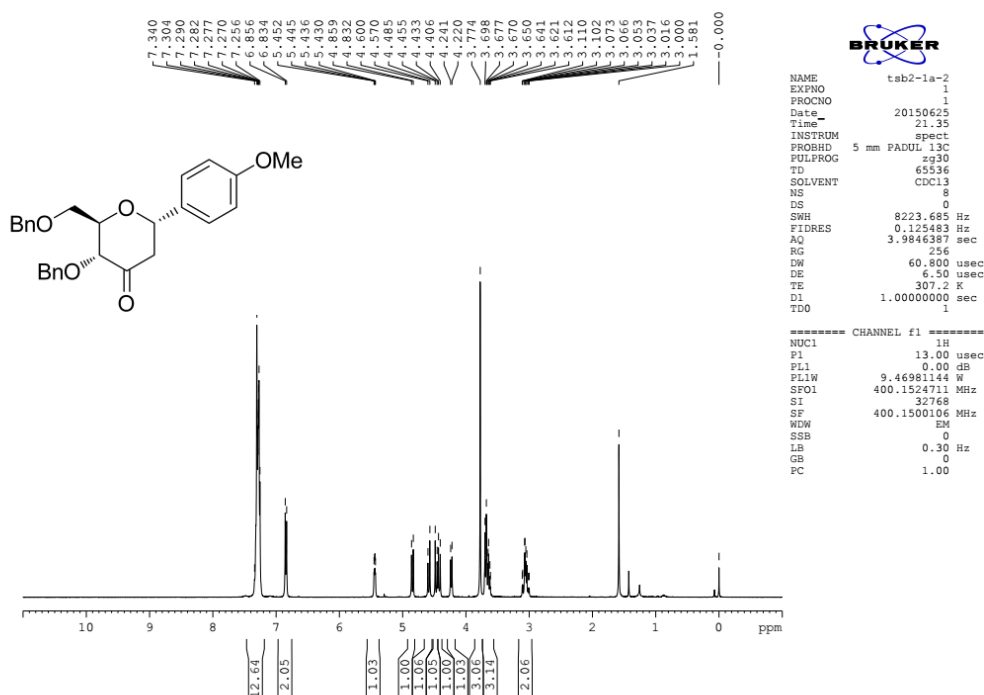

<sup>13</sup>C NMR spectrum of **4aa**, 100MHz, CDCl<sub>3</sub>

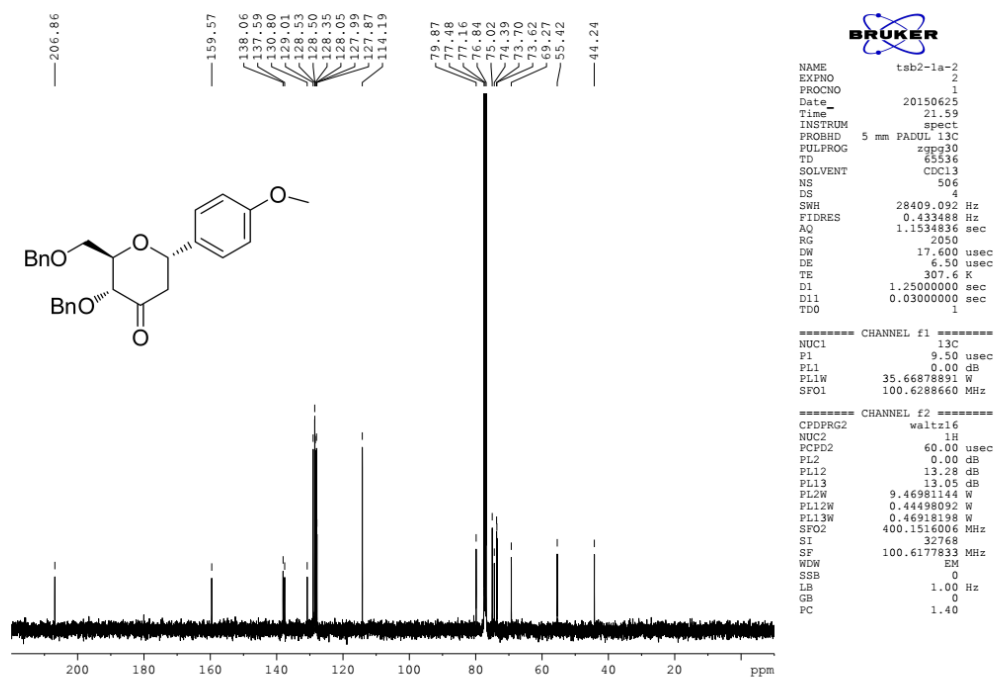

<sup>1</sup>H NMR spectrum of **5a**, 400MHz, CDCl<sub>3</sub>

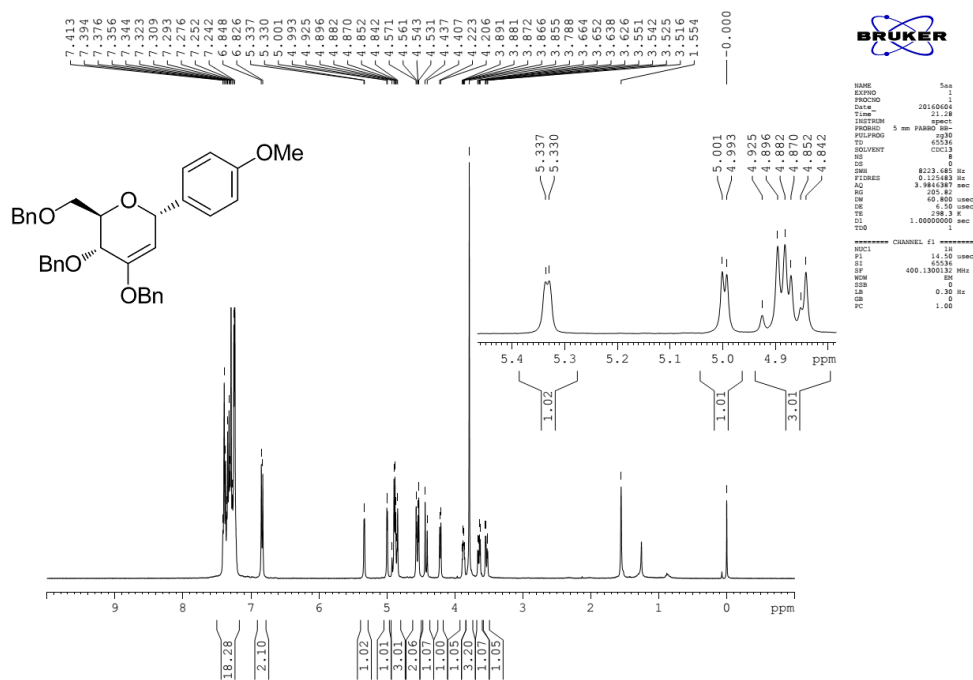

<sup>13</sup>C NMR spectrum of **5a**, 100MHz, CDCl<sub>3</sub>

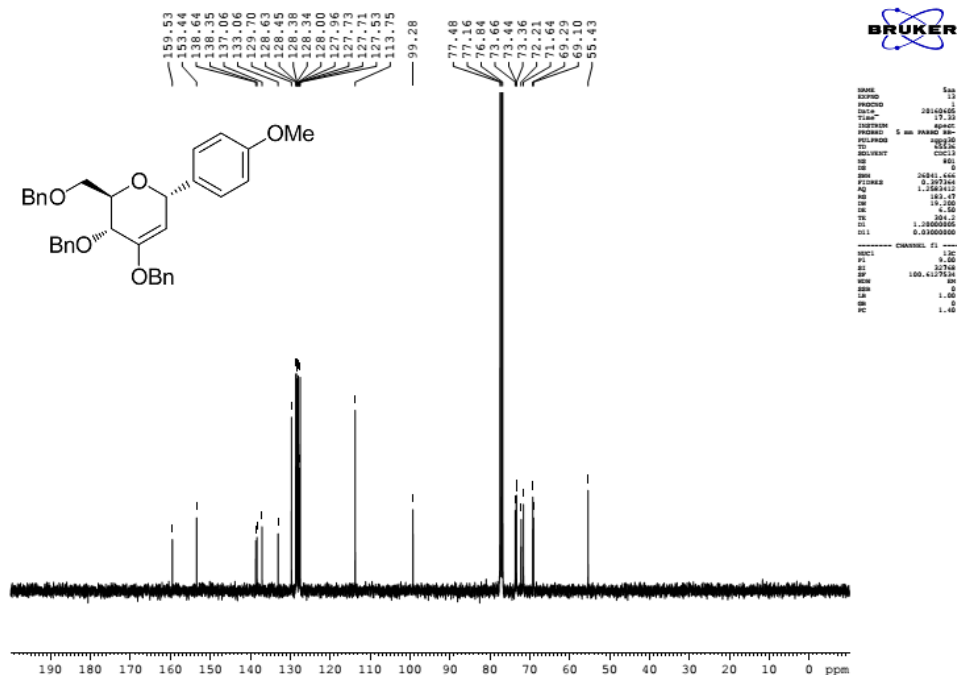

<sup>1</sup>H NMR spectrum of **4ba**, 400MHz, CDCl<sub>3</sub>

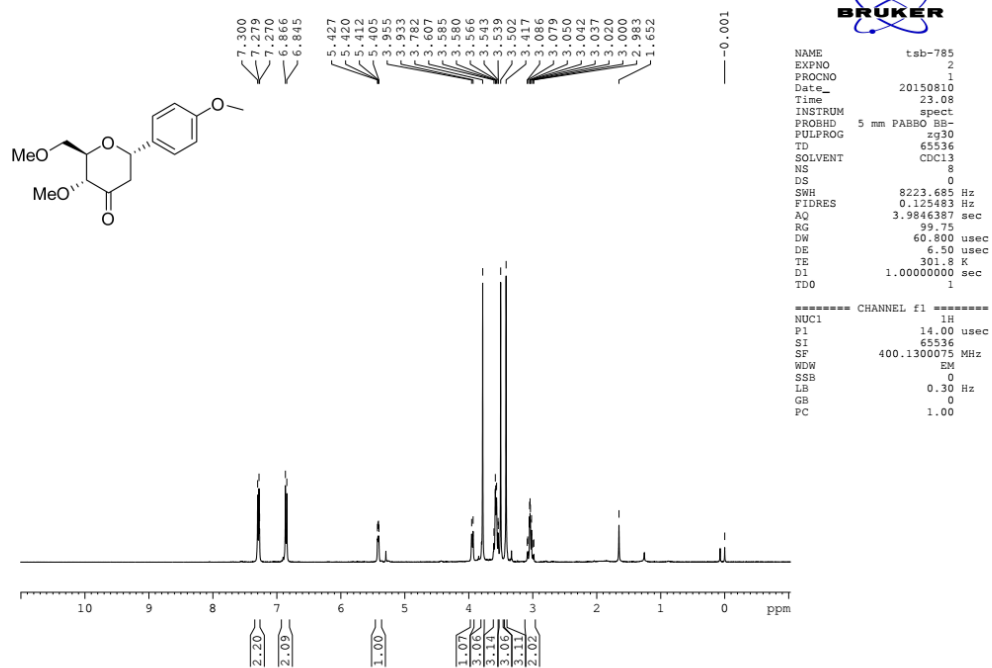

$^{13}\text{C}$  NMR spectrum of **4ba**, 100MHz,  $\text{CDCl}_3$

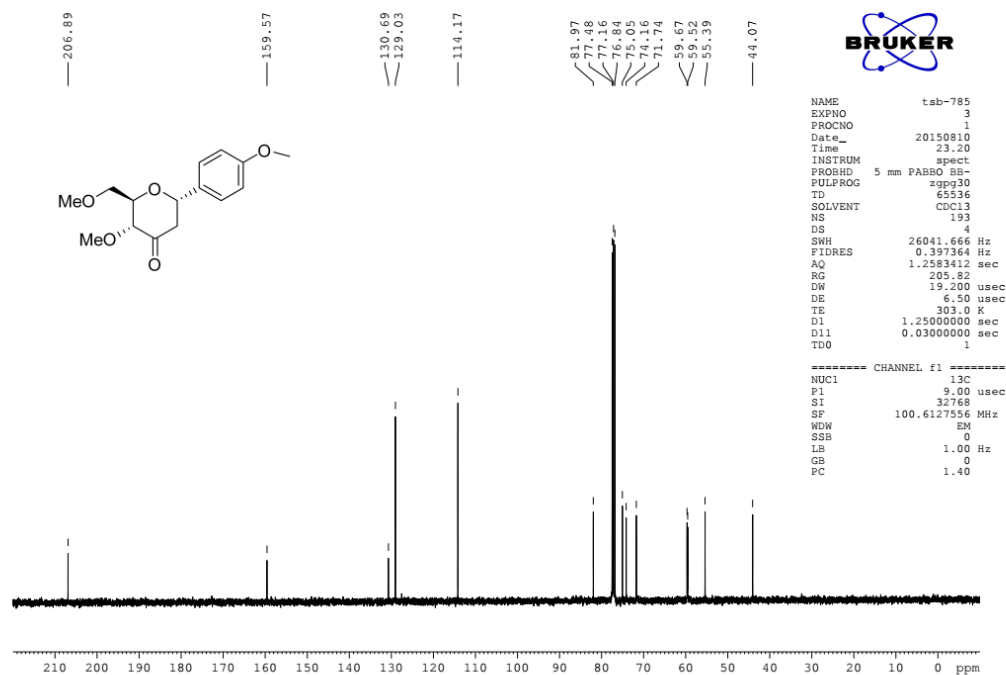

$^1\text{H}$  NMR spectrum of **4ca**, 400MHz,  $\text{CDCl}_3$

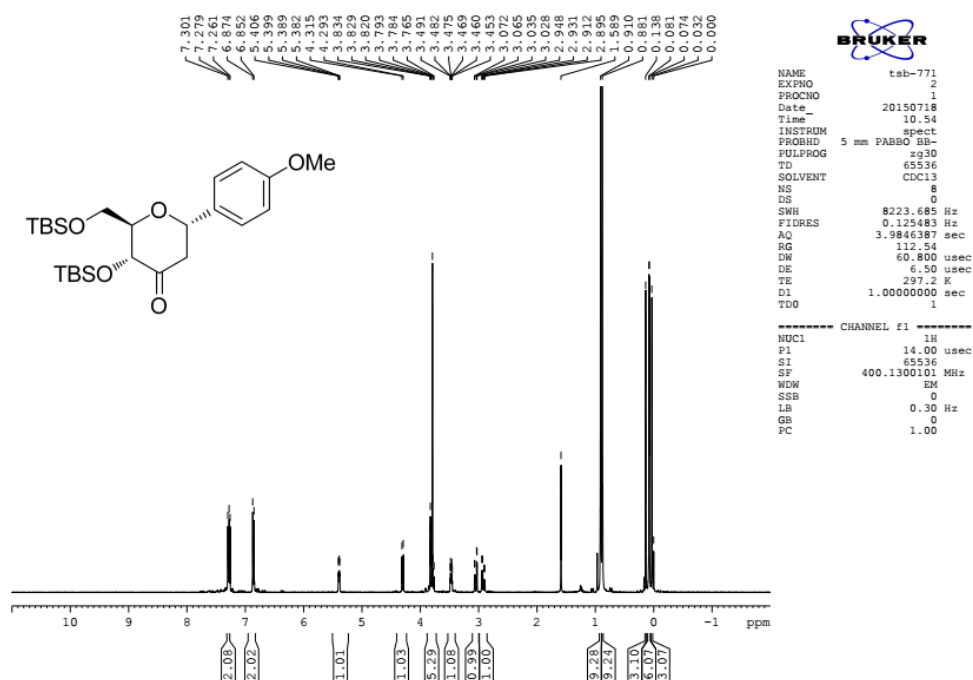

$^{13}\text{C}$  NMR spectrum of **4ca**, 100MHz,  $\text{CDCl}_3$

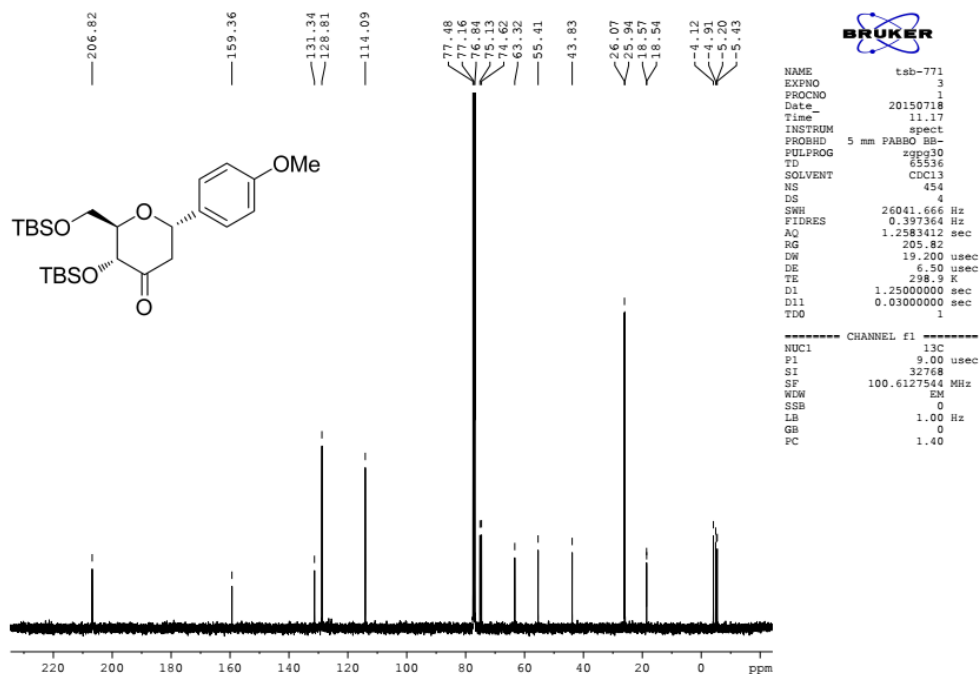

$^1\text{H}$  NMR spectrum of **4da**, 400MHz,  $\text{CDCl}_3$

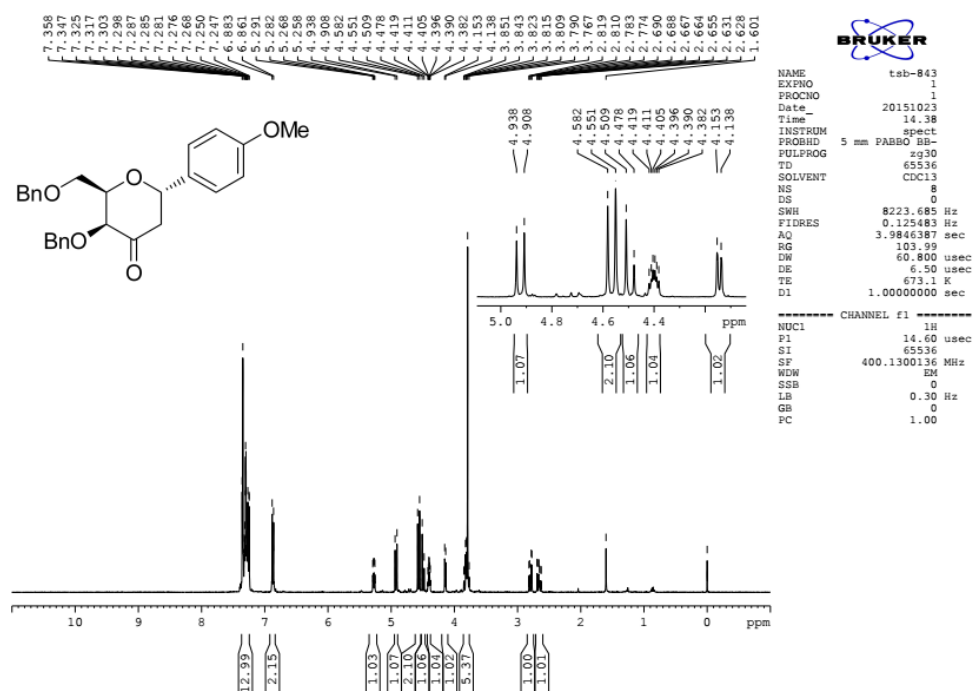

$^{13}\text{C}$  NMR spectrum of **4da**, 100MHz,  $\text{CDCl}_3$

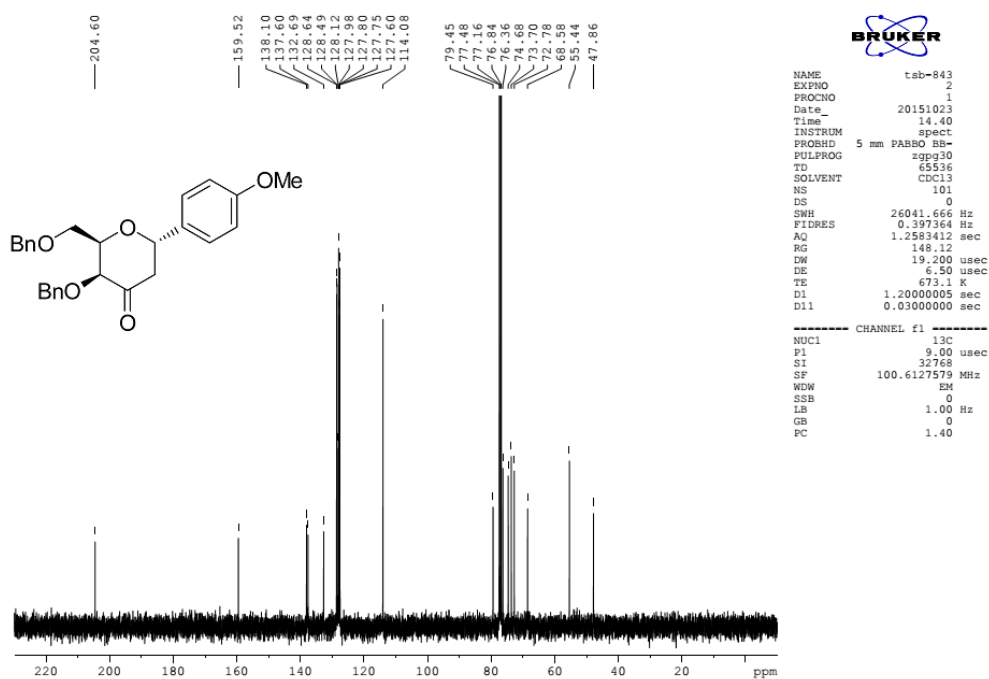



<sup>1</sup>H NMR spectrum of **4ea**, 400MHz, CDCl<sub>3</sub>

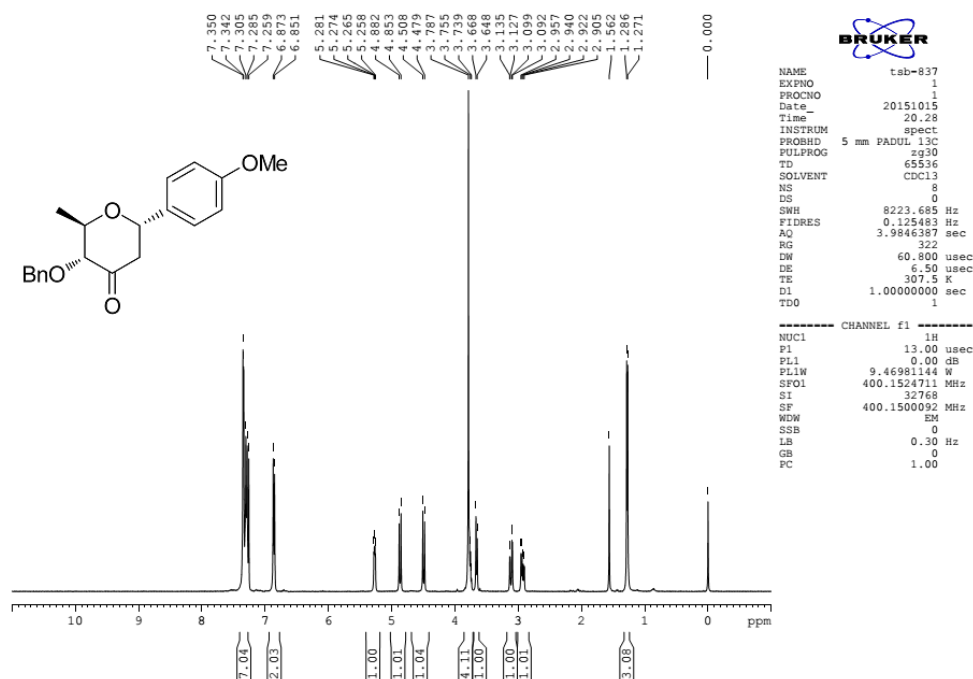

<sup>13</sup>C NMR spectrum of **4ea**, 100MHz, CDCl<sub>3</sub>

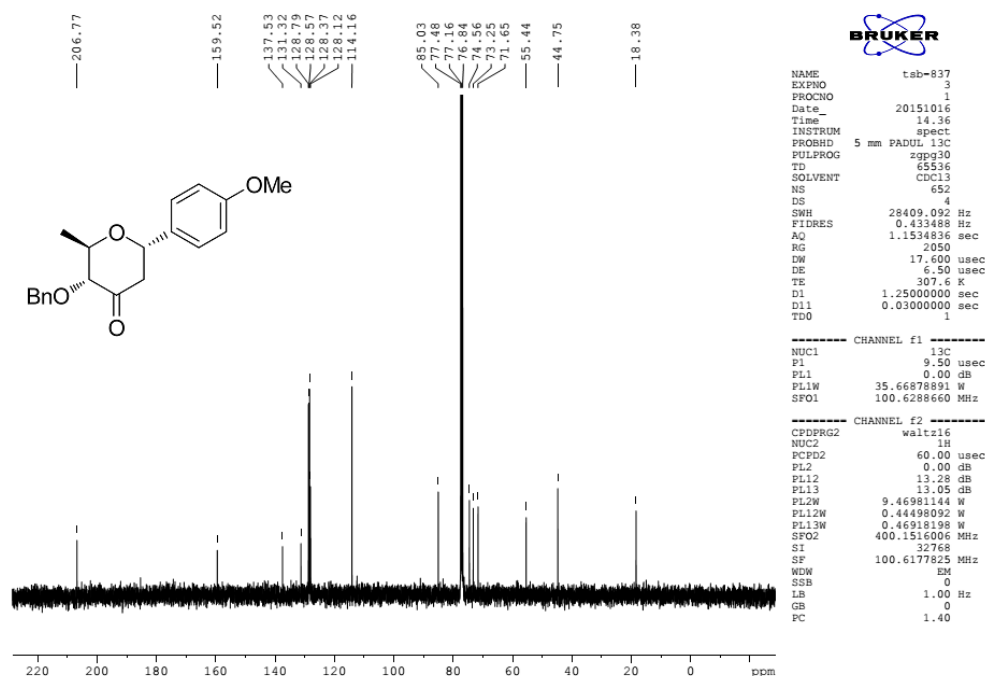

$^1\text{H}$  NMR spectrum of **4fa**, 400MHz,  $\text{CDCl}_3$

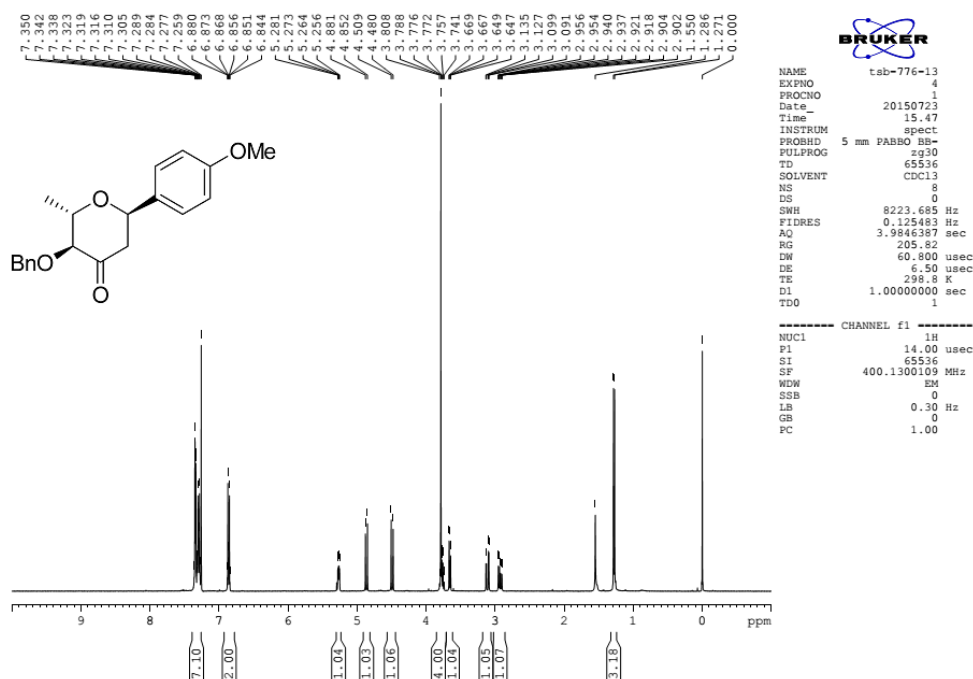

$^{13}\text{C}$  NMR spectrum of **4fa**, 100MHz,  $\text{CDCl}_3$

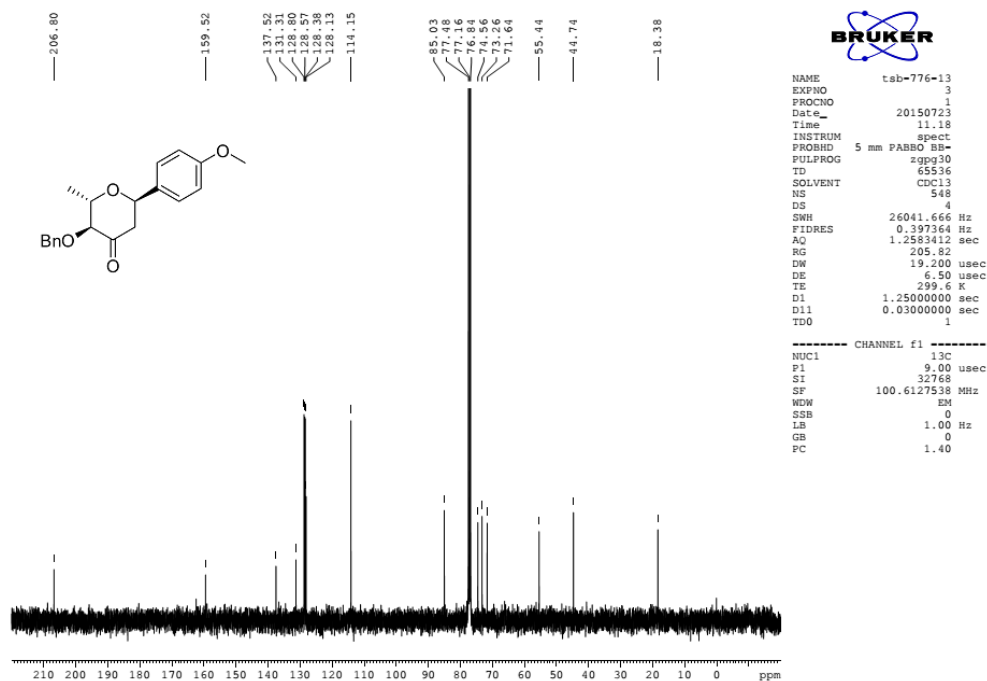

<sup>1</sup>H NMR spectrum of **4gβ**, 400MHz, CDCl<sub>3</sub>

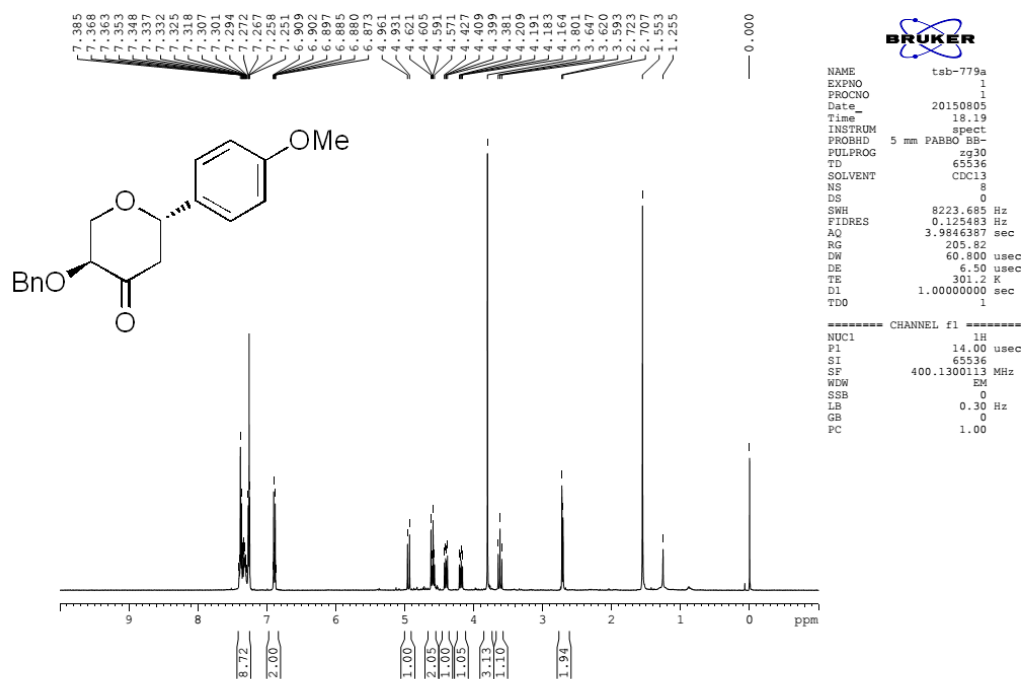

<sup>13</sup>C NMR spectrum of **4gβ**, 100MHz, CDCl<sub>3</sub>

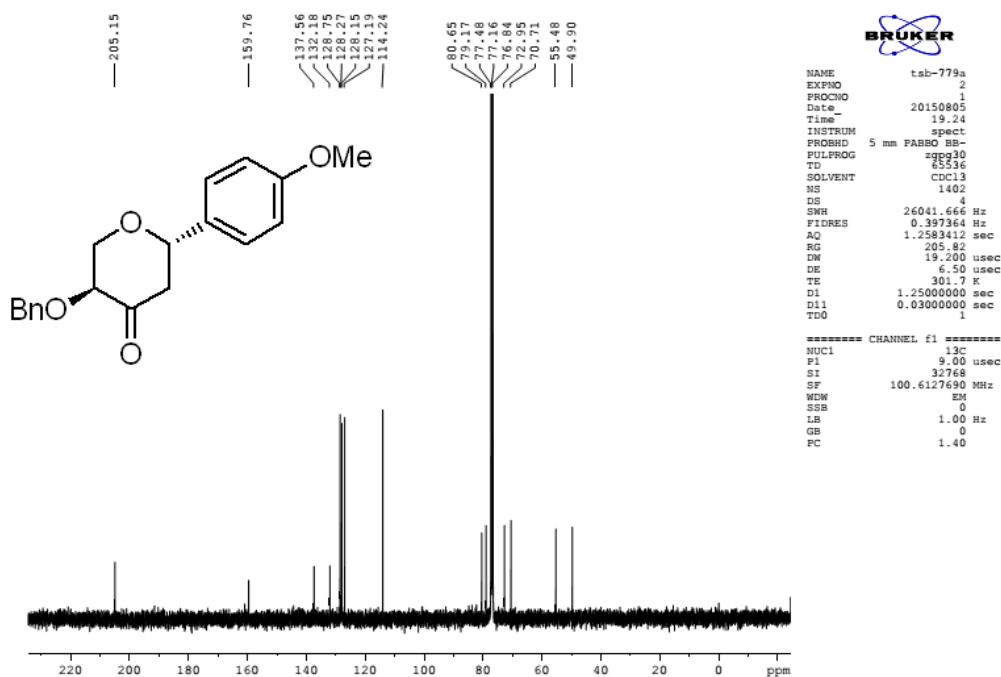

<sup>1</sup>H NMR spectrum of **4ha**, 400MHz, CDCl<sub>3</sub>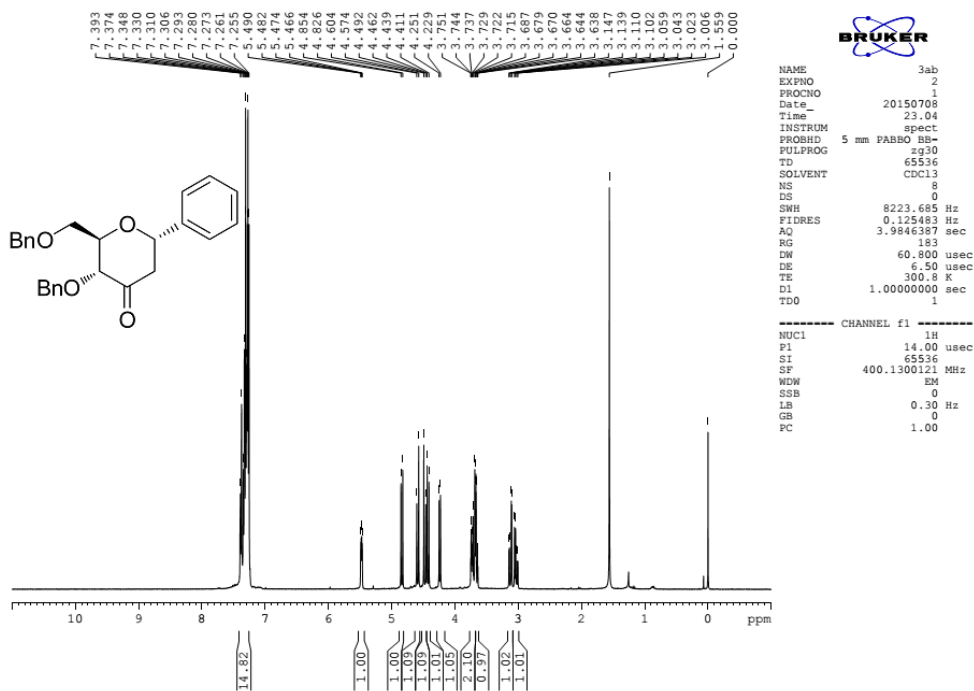

<sup>13</sup>C NMR spectrum of **4ha**, 100MHz, CDCl<sub>3</sub>

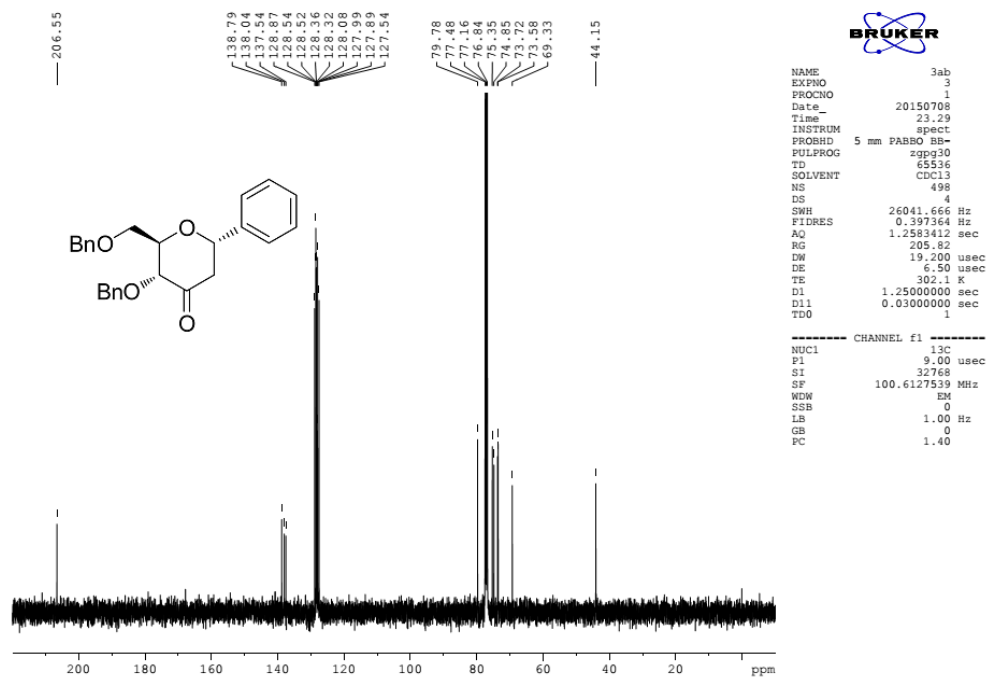

$^1\text{H}$  NMR spectrum of **4ia**, 400MHz,  $\text{CDCl}_3$

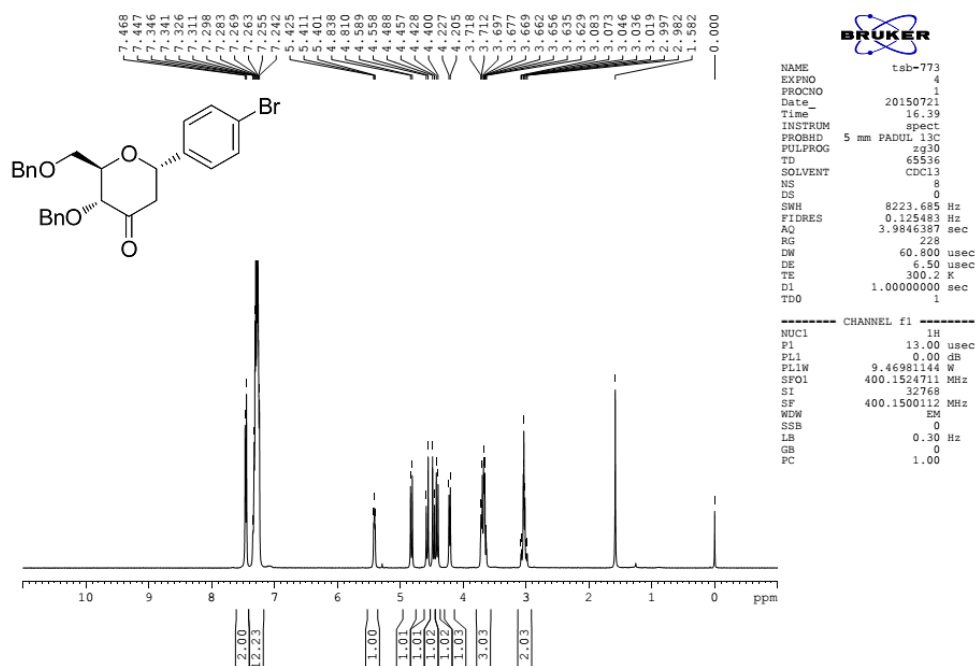

$^{13}\text{C}$  NMR spectrum of **4ia**, 100MHz,  $\text{CDCl}_3$

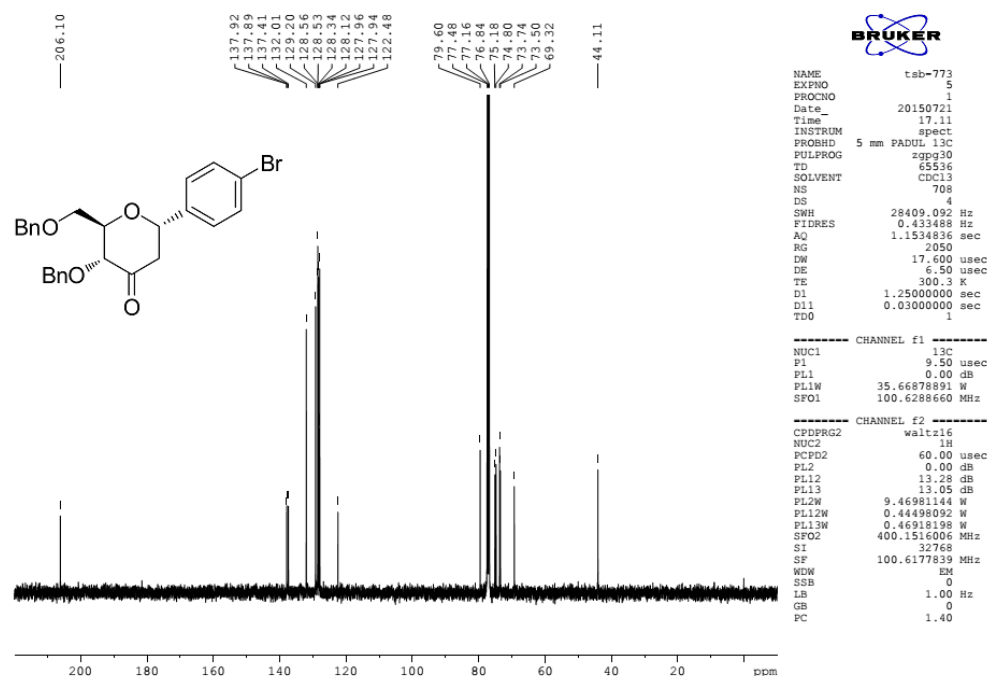

$^1\text{H}$  NMR spectrum of **4ja**, 400MHz,  $\text{CDCl}_3$

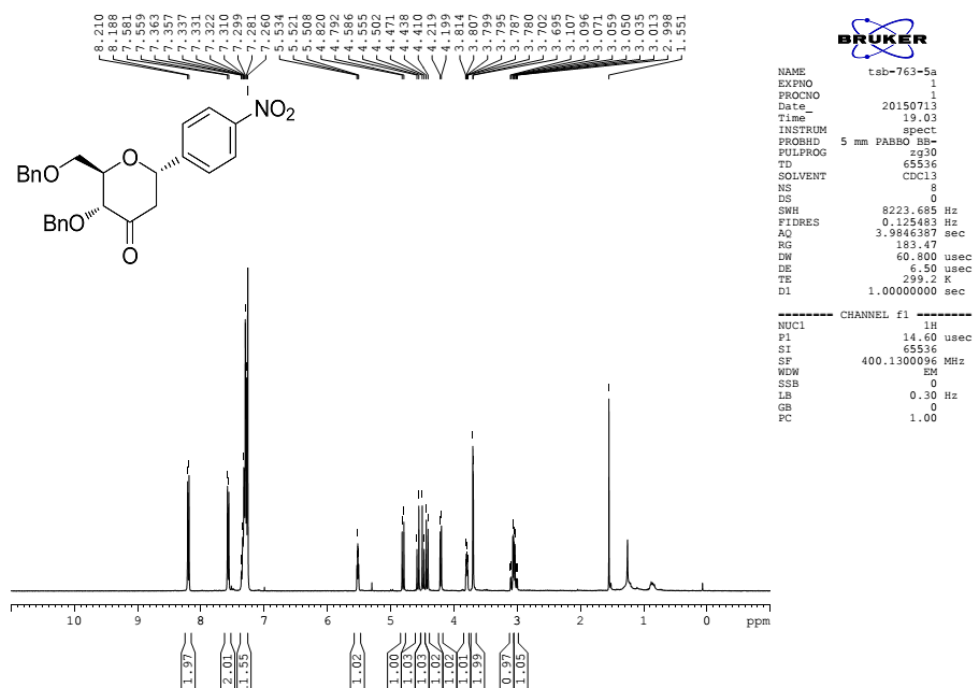

$^{13}\text{C}$  NMR spectrum of **4ja**, 100MHz,  $\text{CDCl}_3$

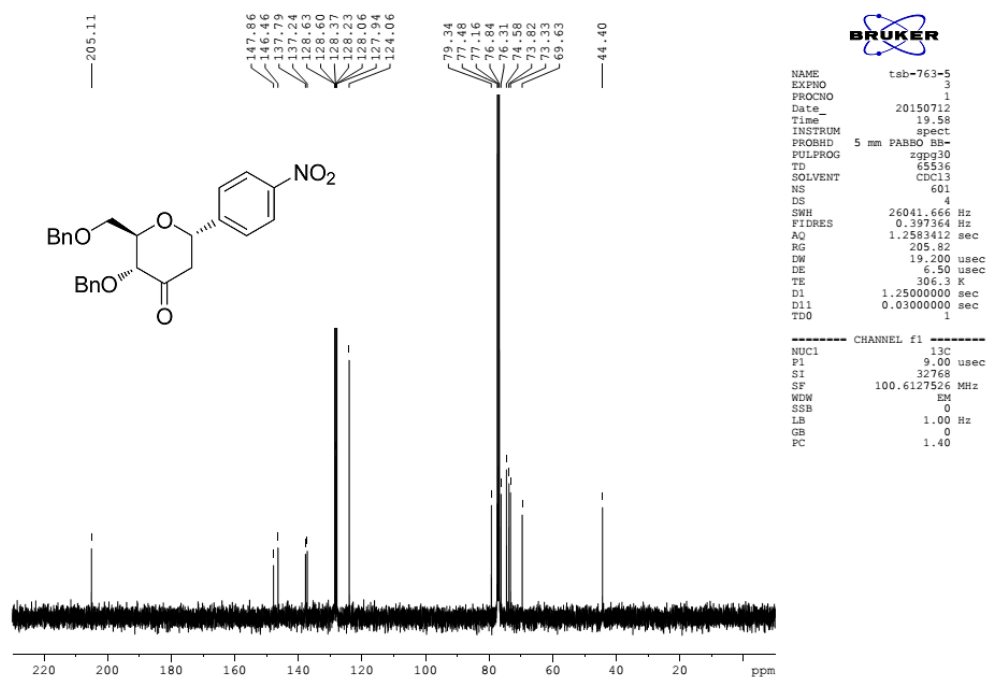

$^1\text{H}$  NMR spectrum of **4ka**, 400MHz,  $\text{CDCl}_3$

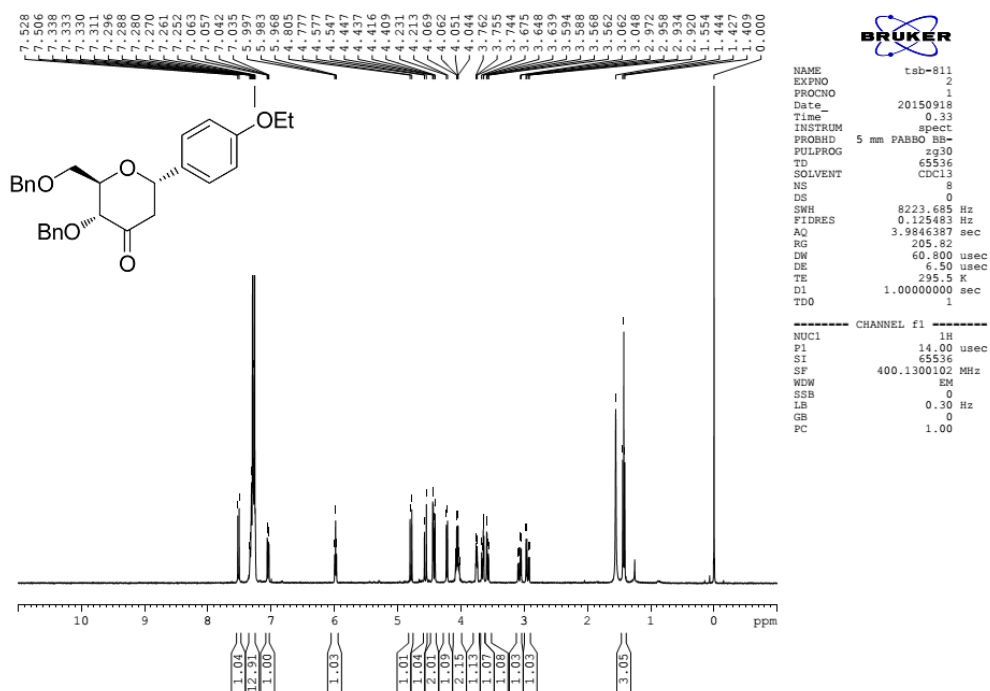

$^{13}\text{C}$  NMR spectrum of **4ka**, 100MHz,  $\text{CDCl}_3$

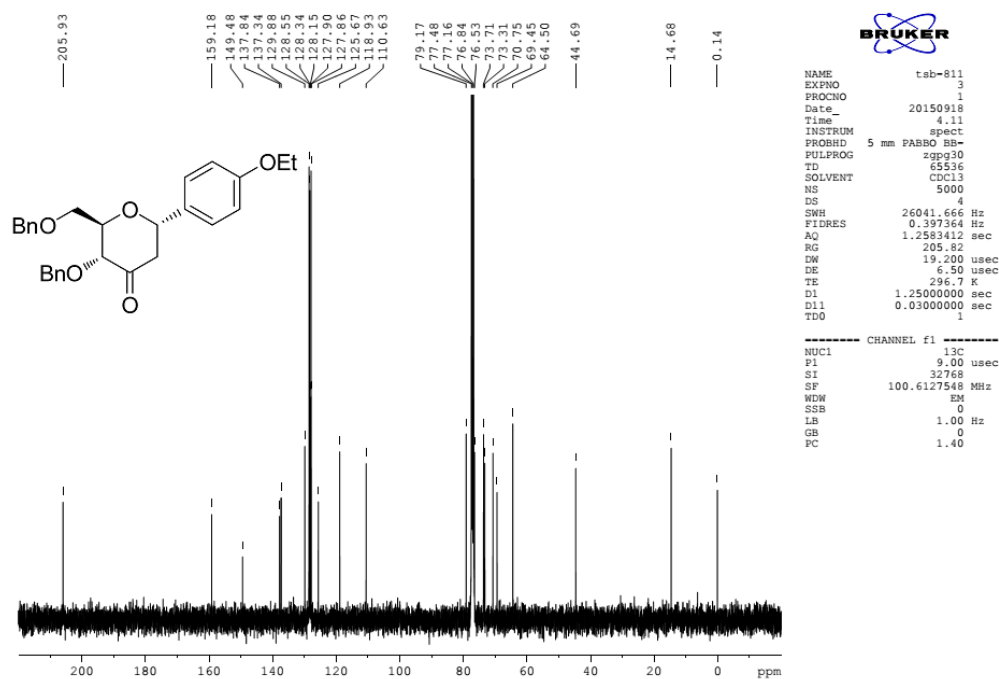

<sup>1</sup>H NMR spectrum of **41a**, 400MHz, CDCl<sub>3</sub>

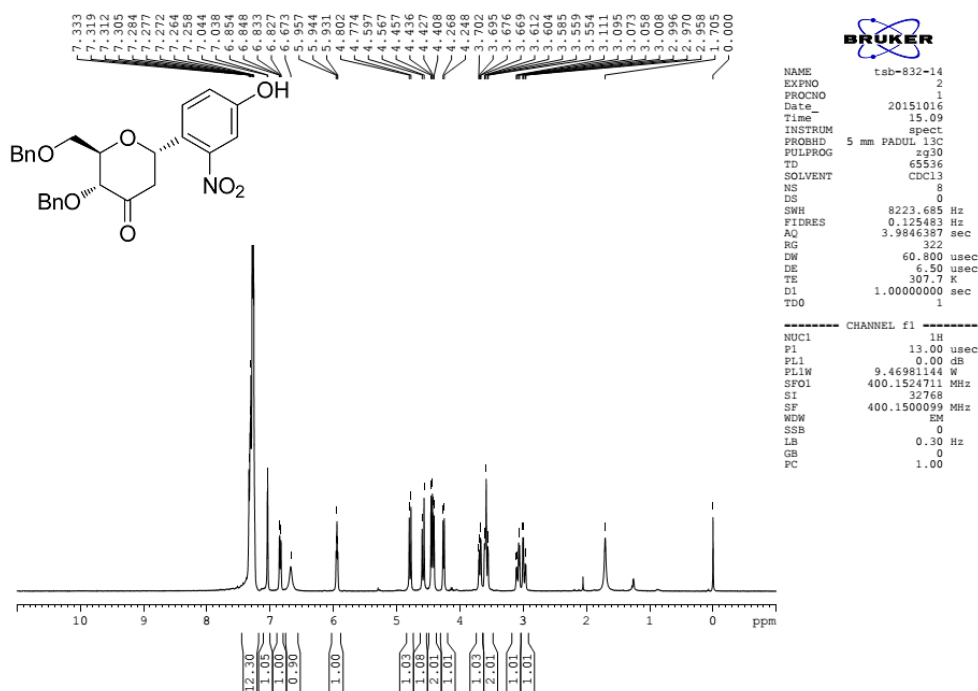

<sup>13</sup>C NMR spectrum of **41a**, 100MHz, CDCl<sub>3</sub>

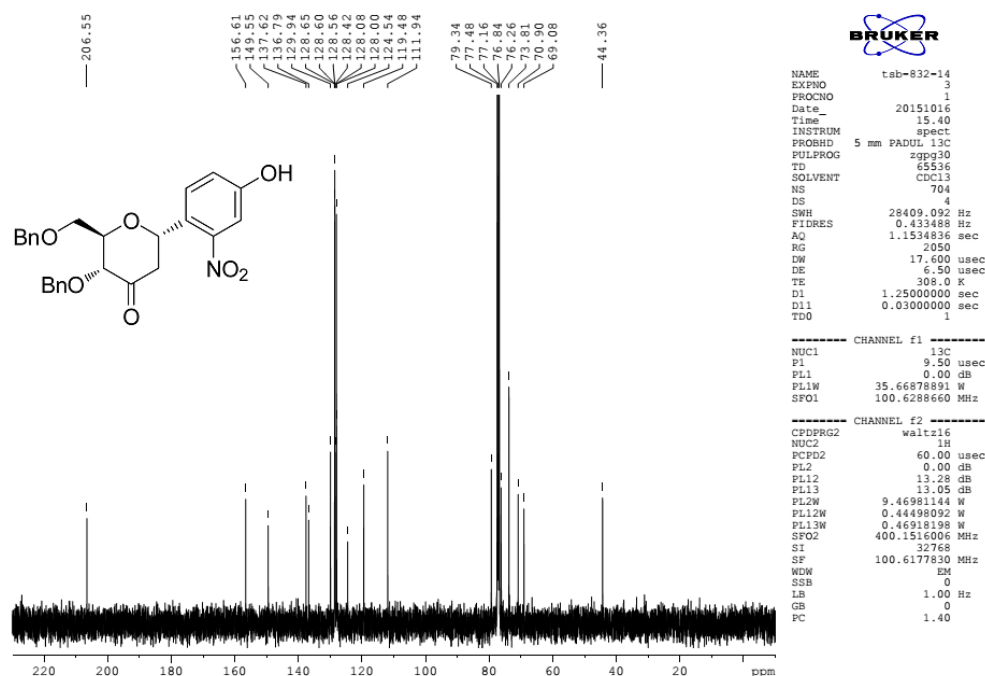



$^1\text{H}$  NMR spectrum of **4ma**, 400MHz,  $\text{CDCl}_3$

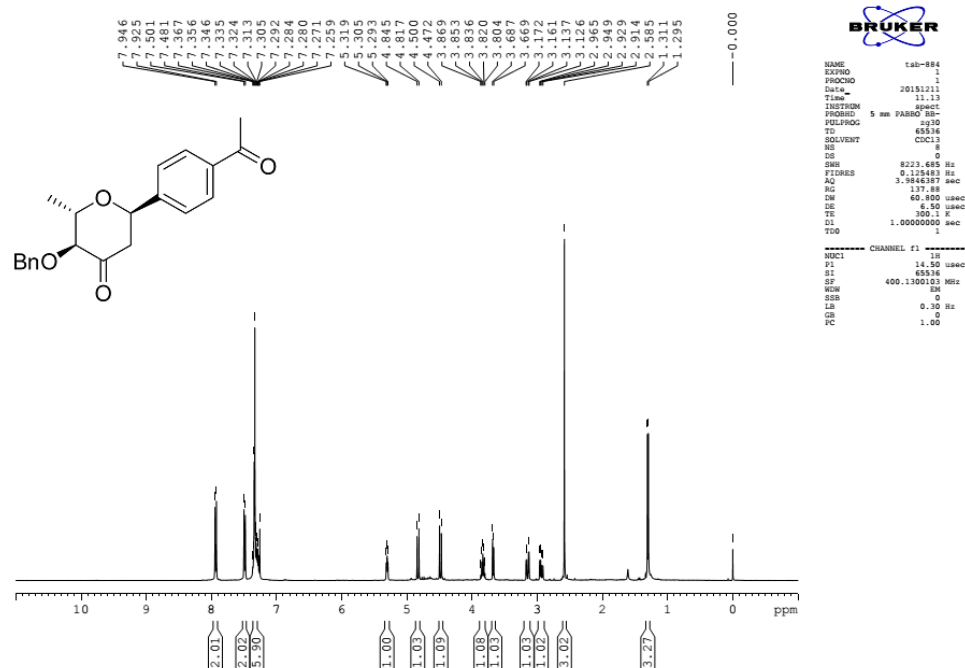

$^{13}\text{C}$  NMR spectrum of **4ma**, 100MHz,  $\text{CDCl}_3$

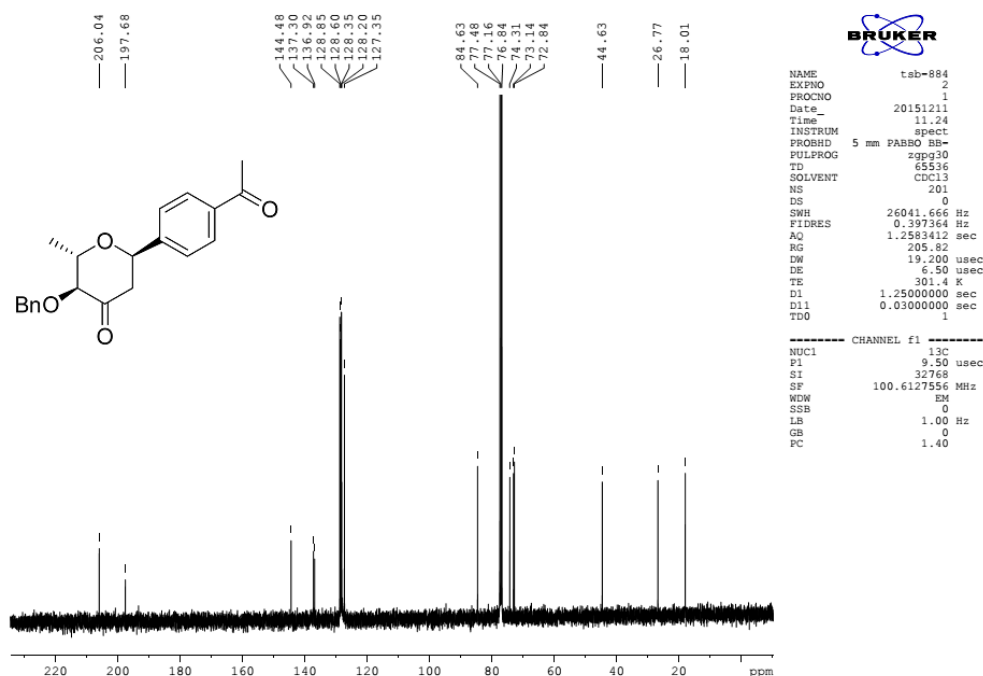

<sup>1</sup>H NMR spectrum of **4na**, 400MHz, CDCl<sub>3</sub>

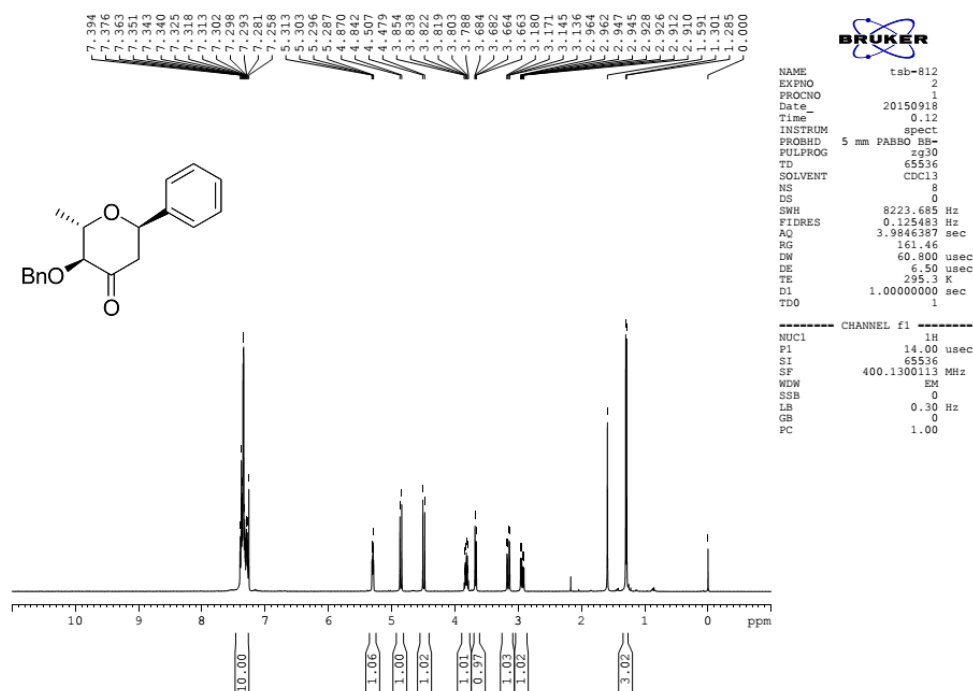

<sup>13</sup>C NMR spectrum of **4na**, 100MHz, CDCl<sub>3</sub>

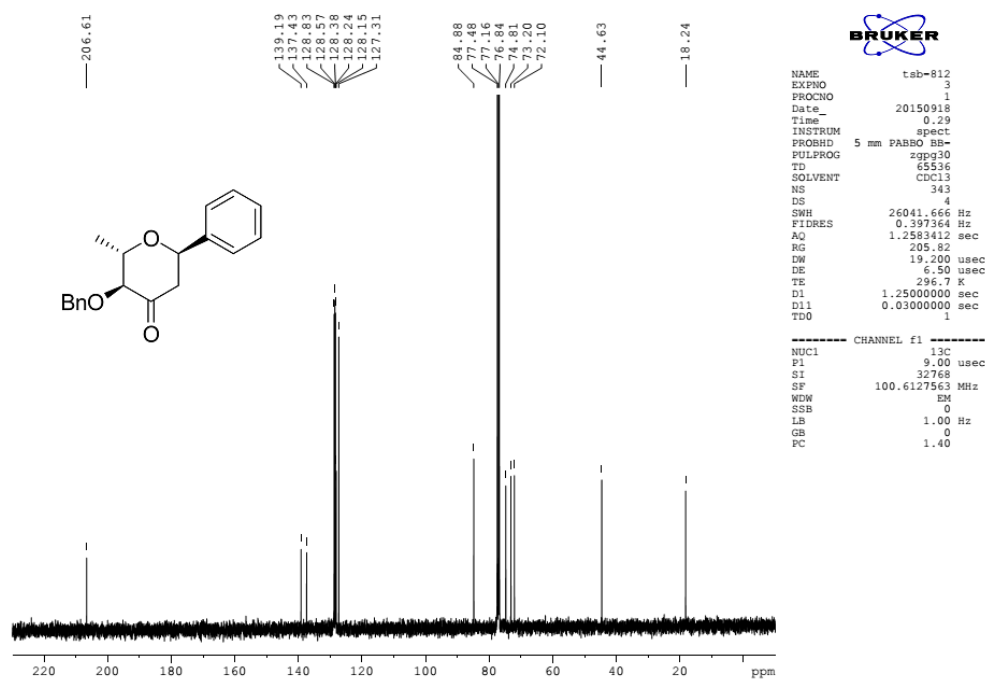

$^1\text{H}$  NMR spectrum of **40a**, 400MHz,  $\text{CDCl}_3$

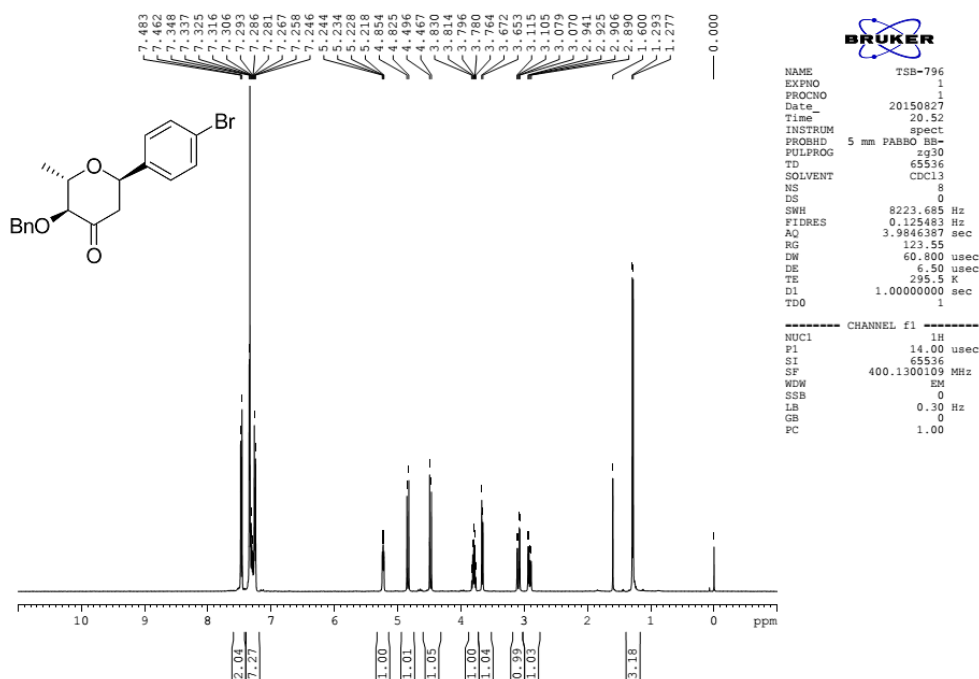

$^{13}\text{C}$  NMR spectrum of **40a**, 100MHz,  $\text{CDCl}_3$

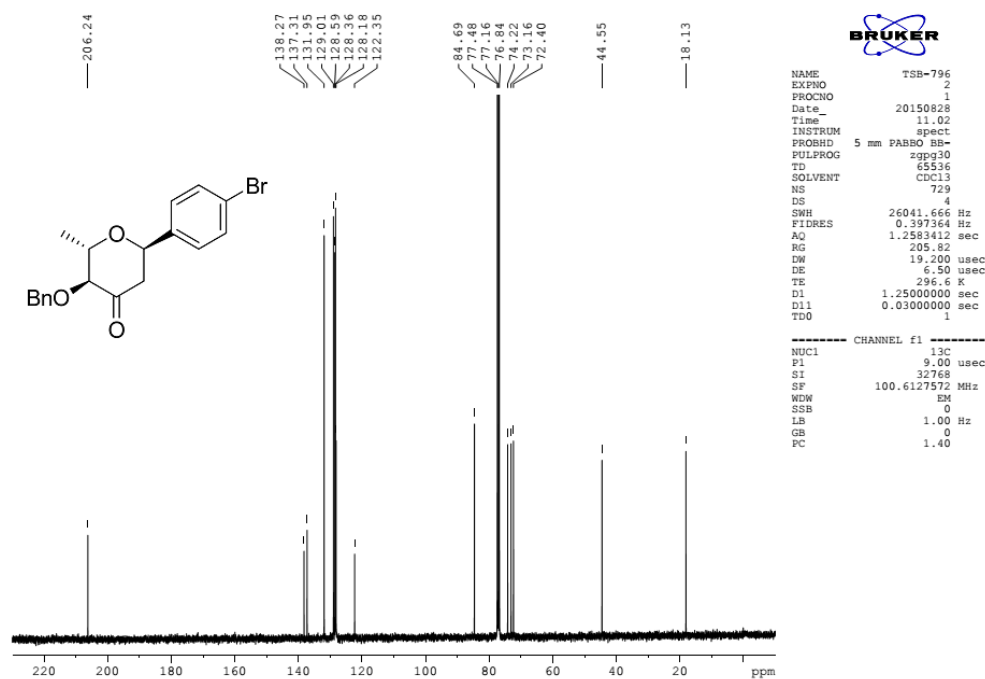

<sup>1</sup>H NMR spectrum of **4pa**, 400MHz, CDCl<sub>3</sub>

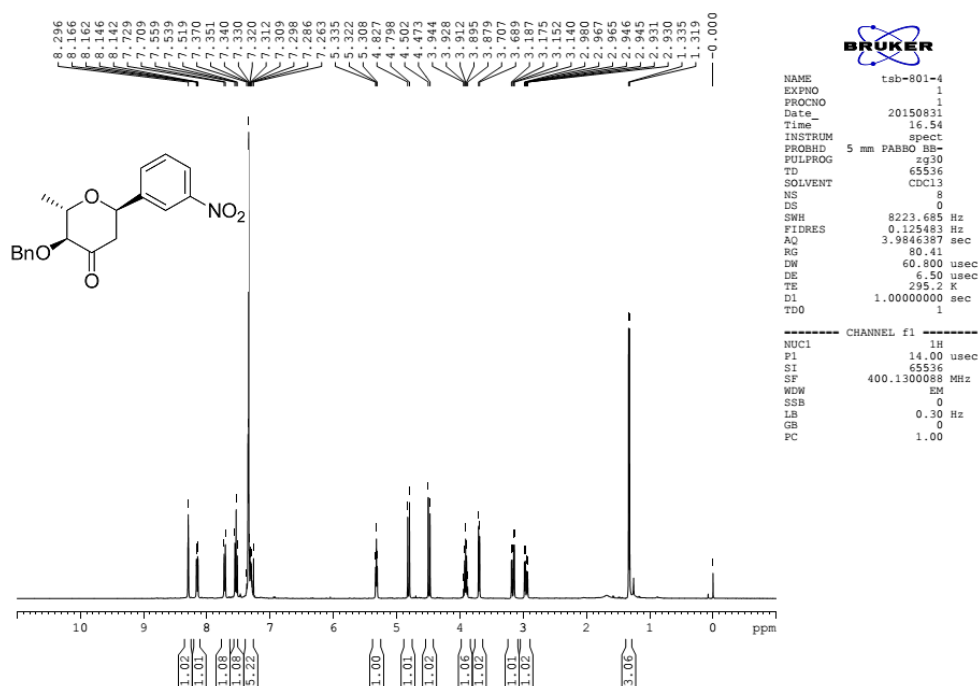

<sup>13</sup>C NMR spectrum of **4pa**, 100MHz, CDCl<sub>3</sub>

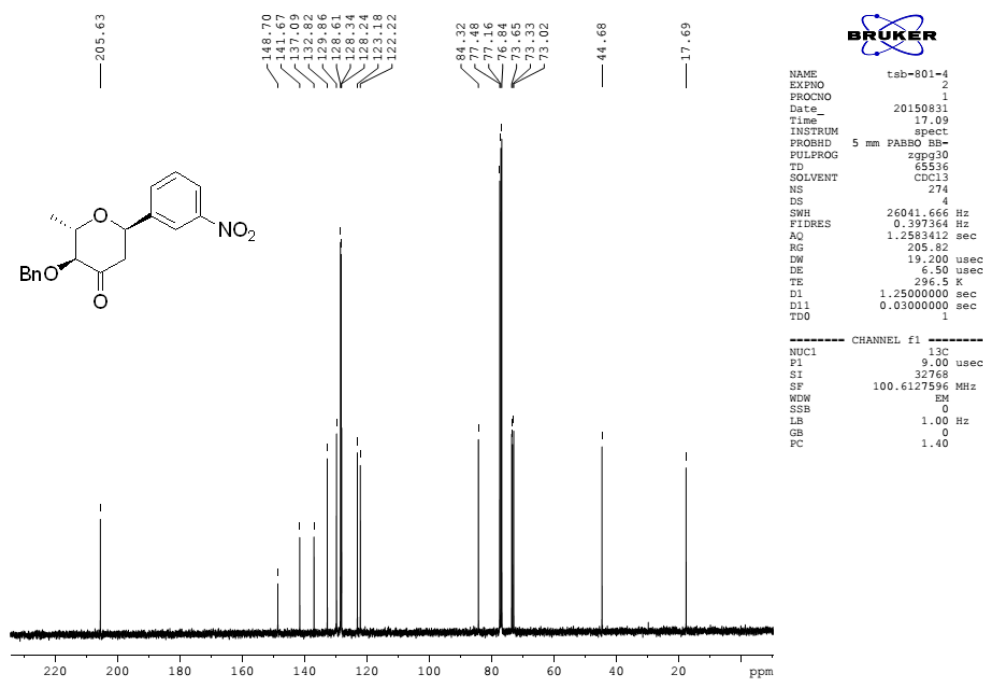

<sup>1</sup>H NMR spectrum of **4qa**, 400MHz, CDCl<sub>3</sub>

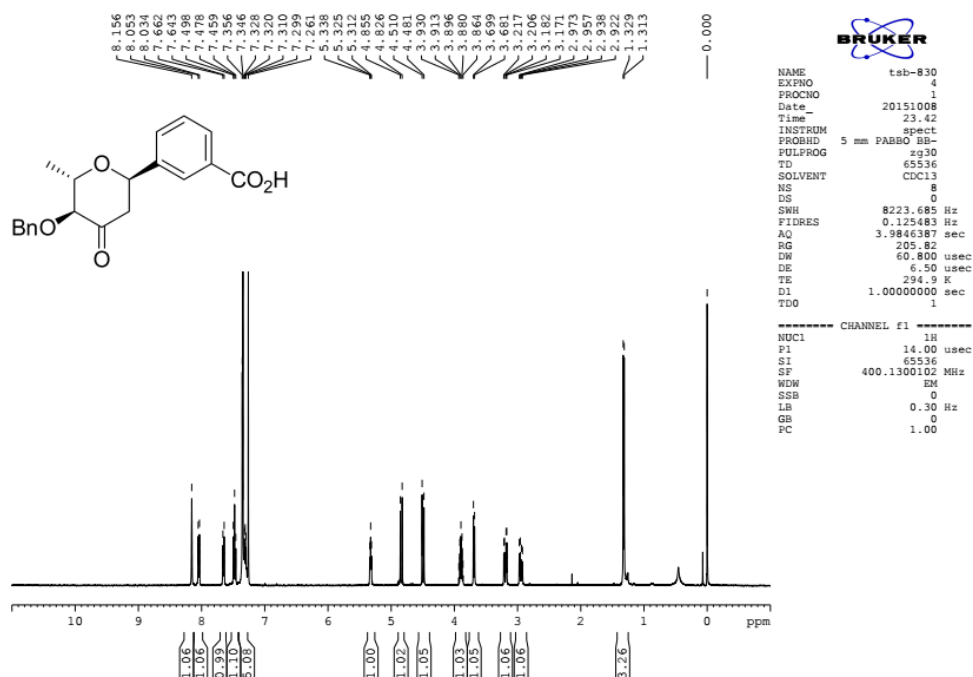

<sup>13</sup>C NMR spectrum of **4qa**, 100MHz, CDCl<sub>3</sub>

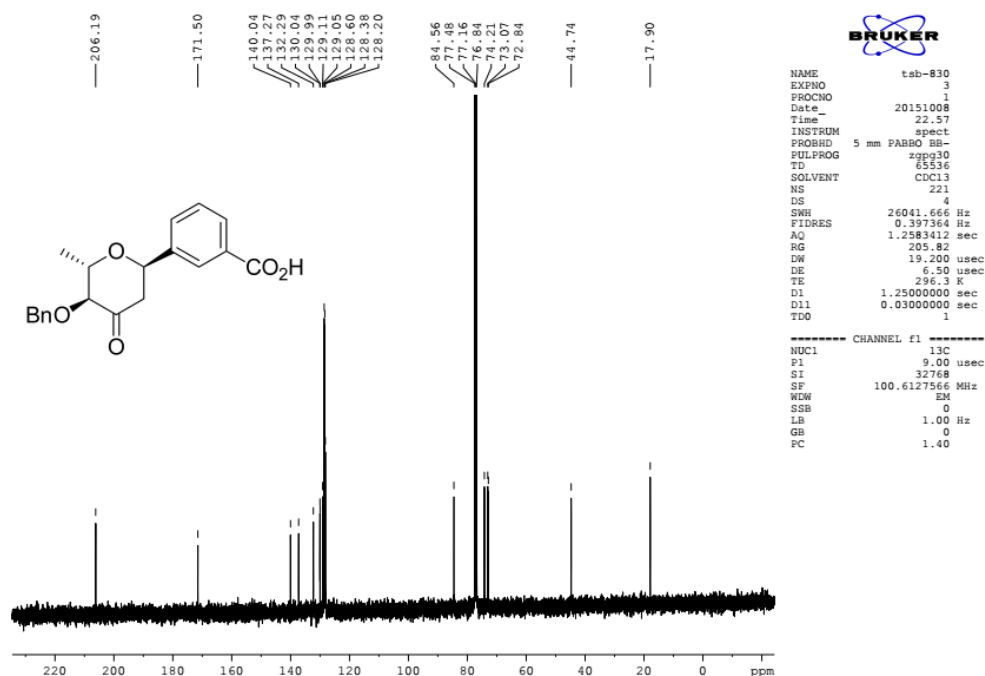

<sup>1</sup>H NMR spectrum of **4ra**, 400MHz, CDCl<sub>3</sub>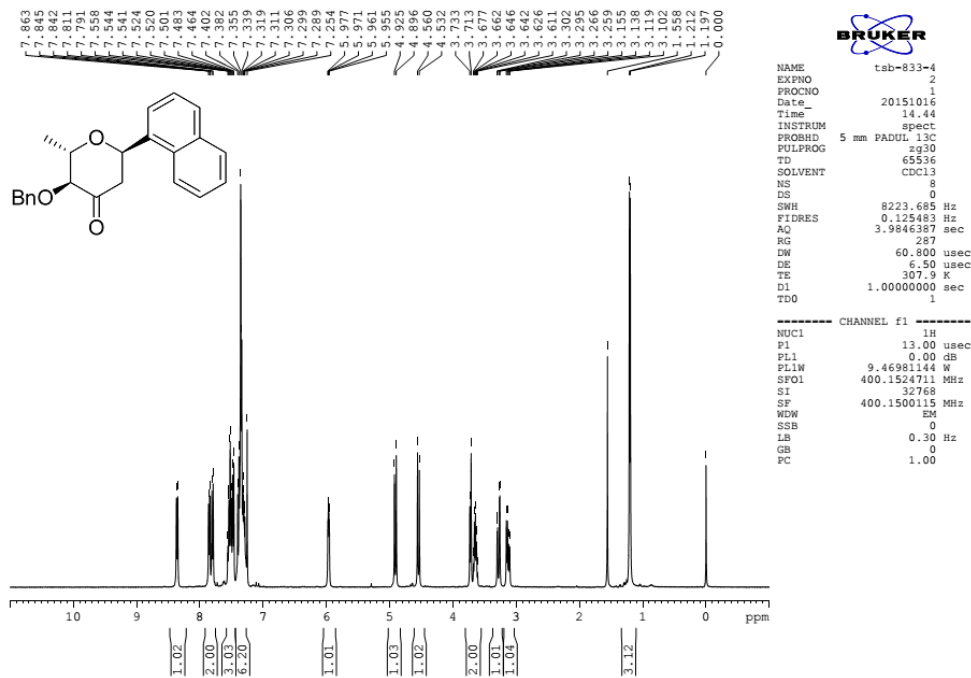

<sup>13</sup>C NMR spectrum of **4ra**, 100MHz, CDCl<sub>3</sub>

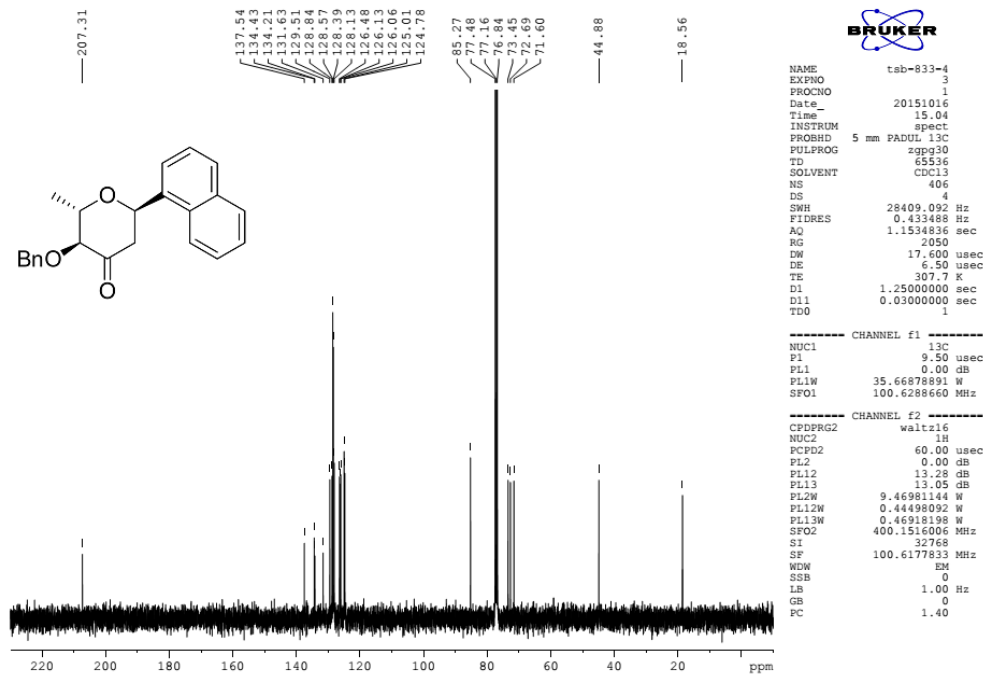

<sup>1</sup>H NMR spectrum of **4sa**, 400MHz, CDCl<sub>3</sub>

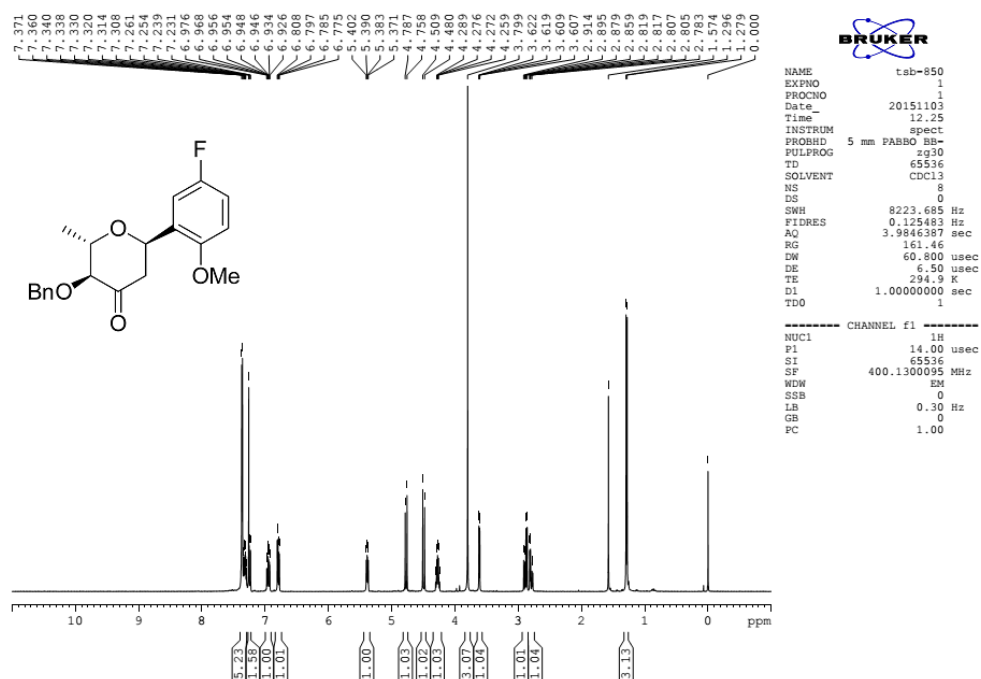

<sup>19</sup>F NMR spectrum of **4sa**, 376MHz, CDCl<sub>3</sub>

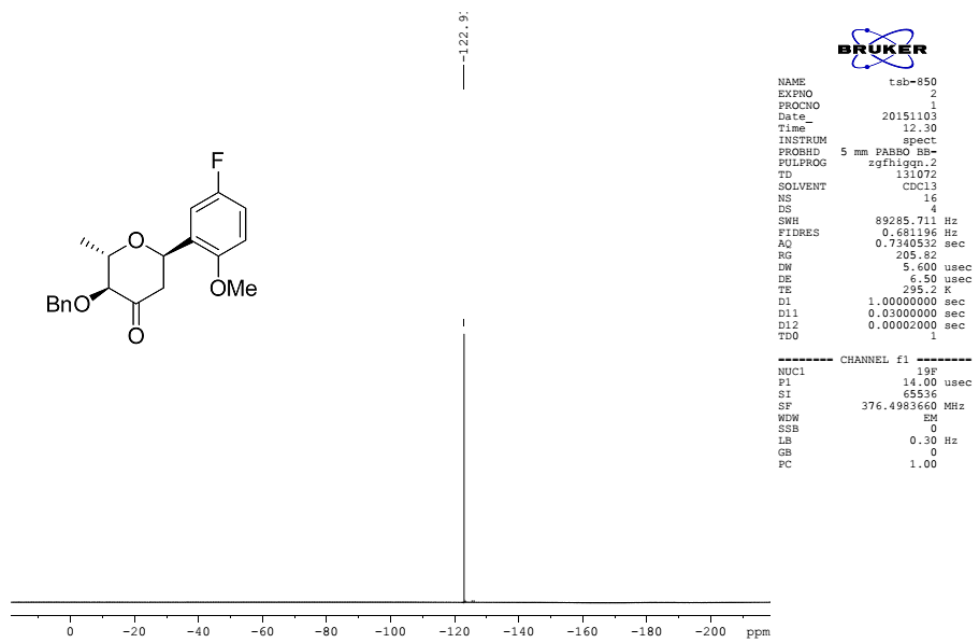

<sup>13</sup>C NMR spectrum of **4sa**, 100MHz, CDCl<sub>3</sub>

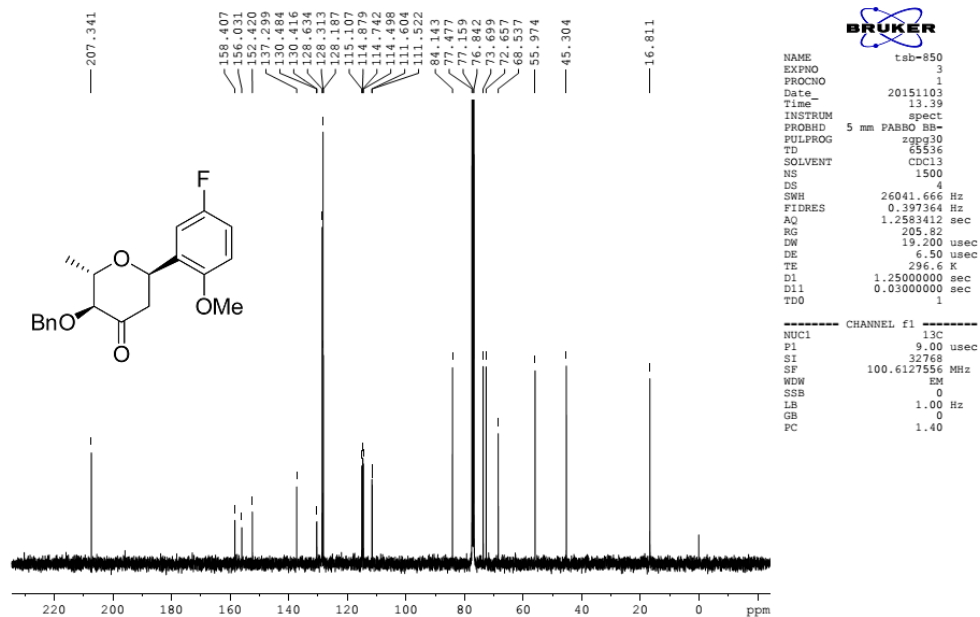



$^1\text{H}$  NMR spectrum of **4ta**, 400MHz,  $\text{CDCl}_3$

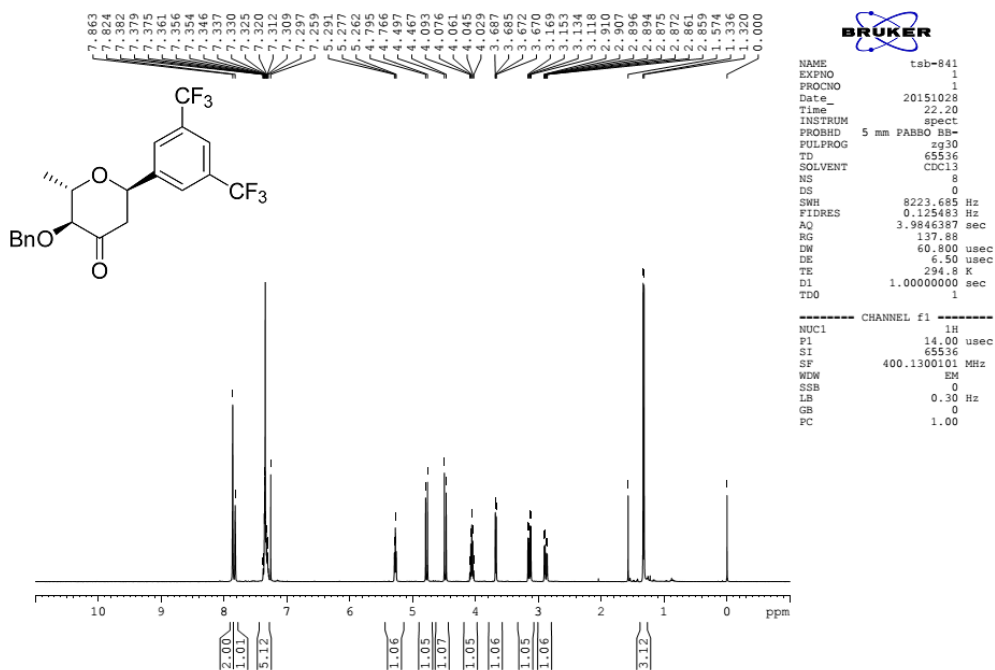

$^{19}\text{F}$  NMR spectrum of **4ta**, 376MHz,  $\text{CDCl}_3$

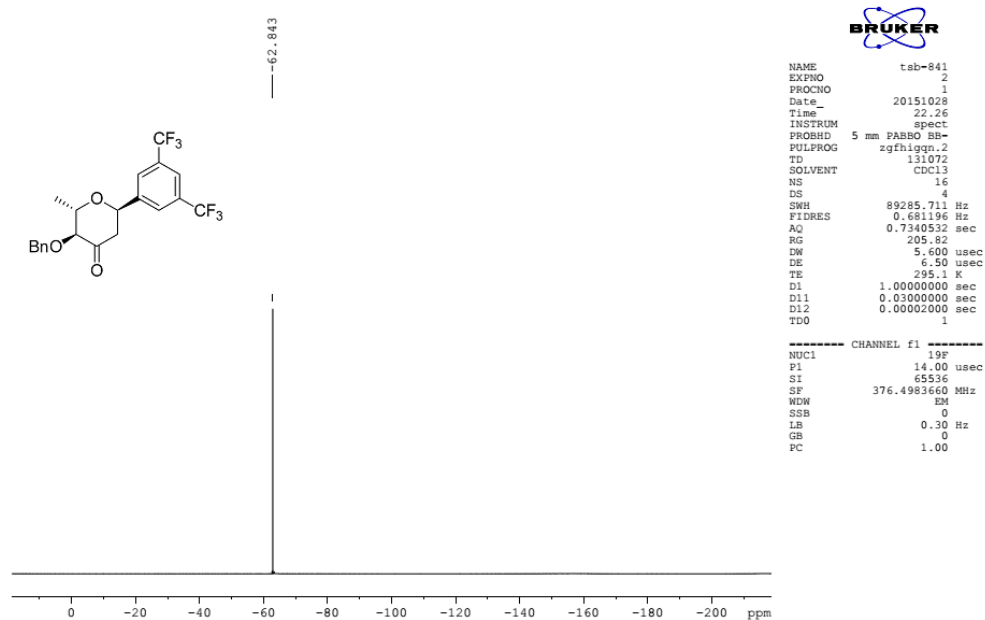

<sup>13</sup>C NMR spectrum of **4ta**, 100MHz, CDCl<sub>3</sub>

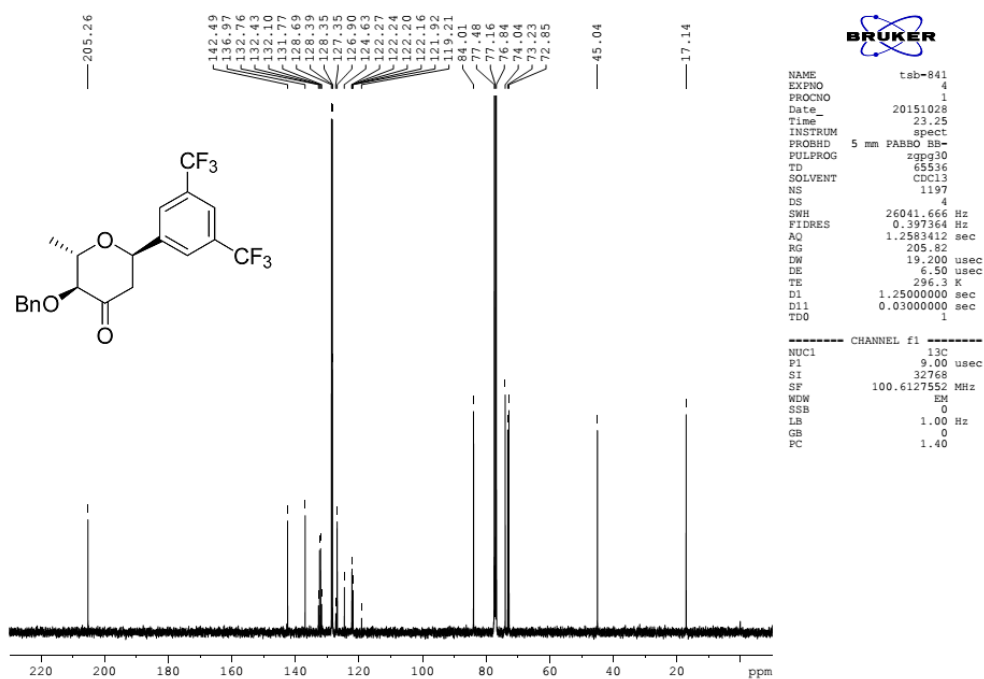

<sup>1</sup>H NMR spectrum of **4ua**, 400MHz, CDCl<sub>3</sub>

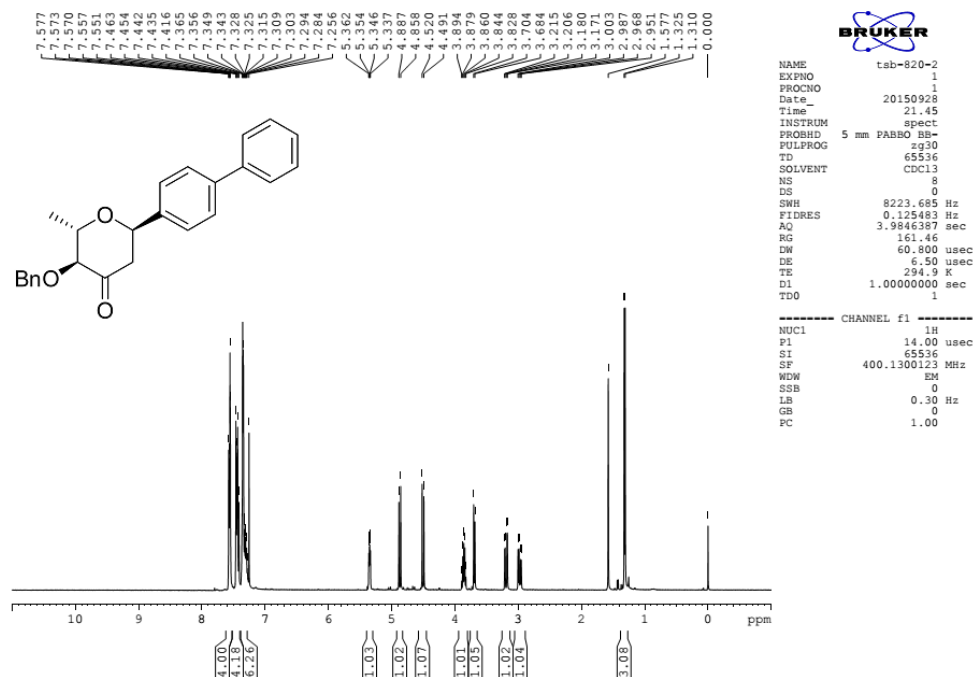

<sup>13</sup>C NMR spectrum of **4ua**, 100MHz, CDCl<sub>3</sub>

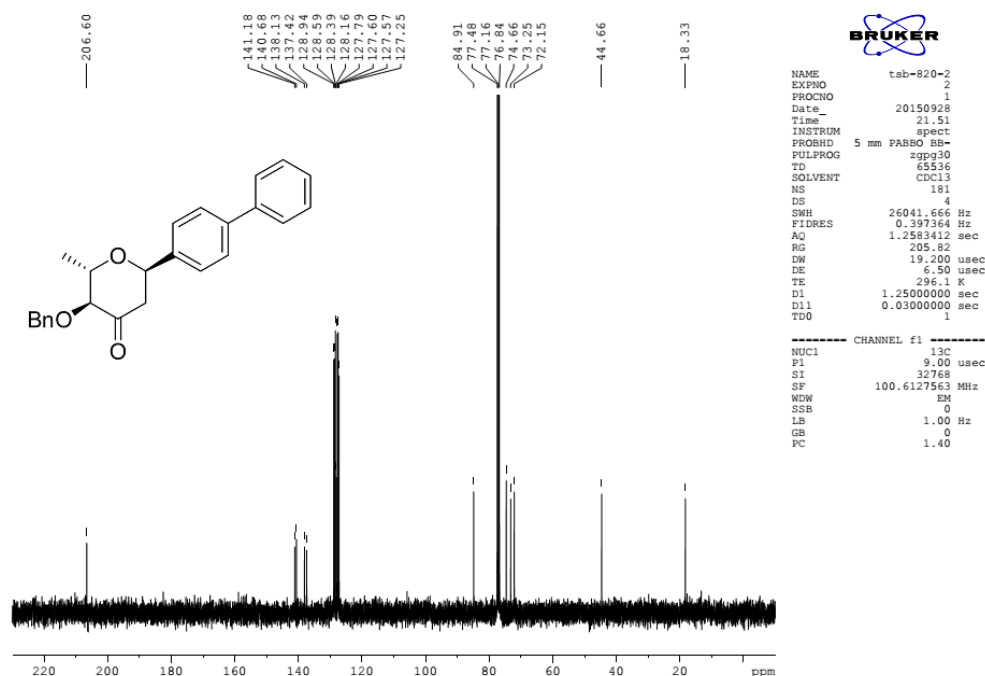

$^1\text{H}$  NMR spectrum of **4a $\beta$** , 400MHz,  $\text{CDCl}_3$

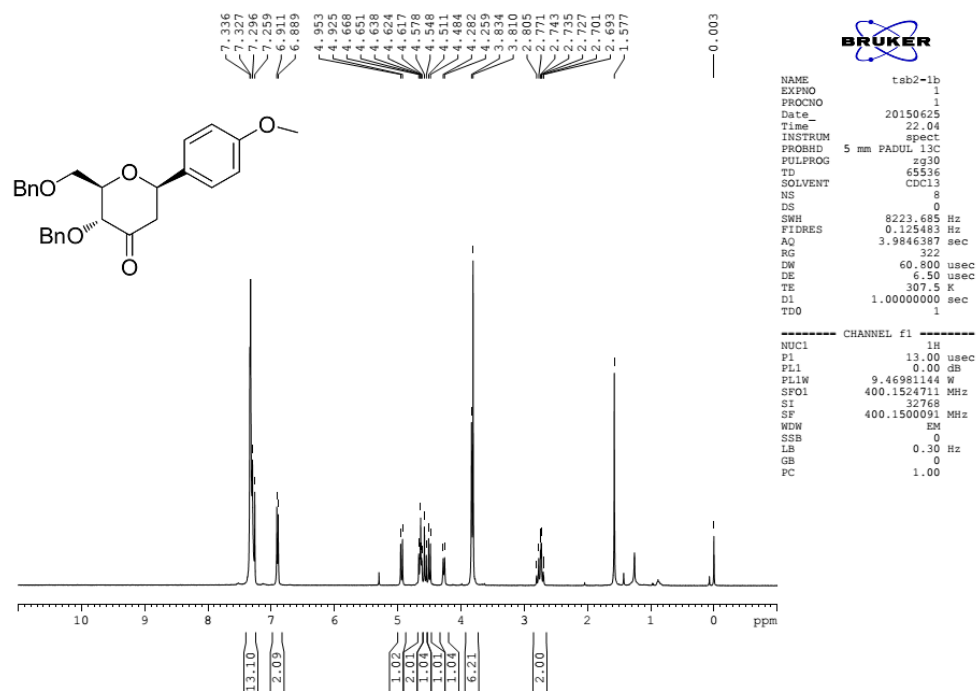

$^{13}\text{C}$  NMR spectrum of **4a $\beta$** , 100MHz,  $\text{CDCl}_3$

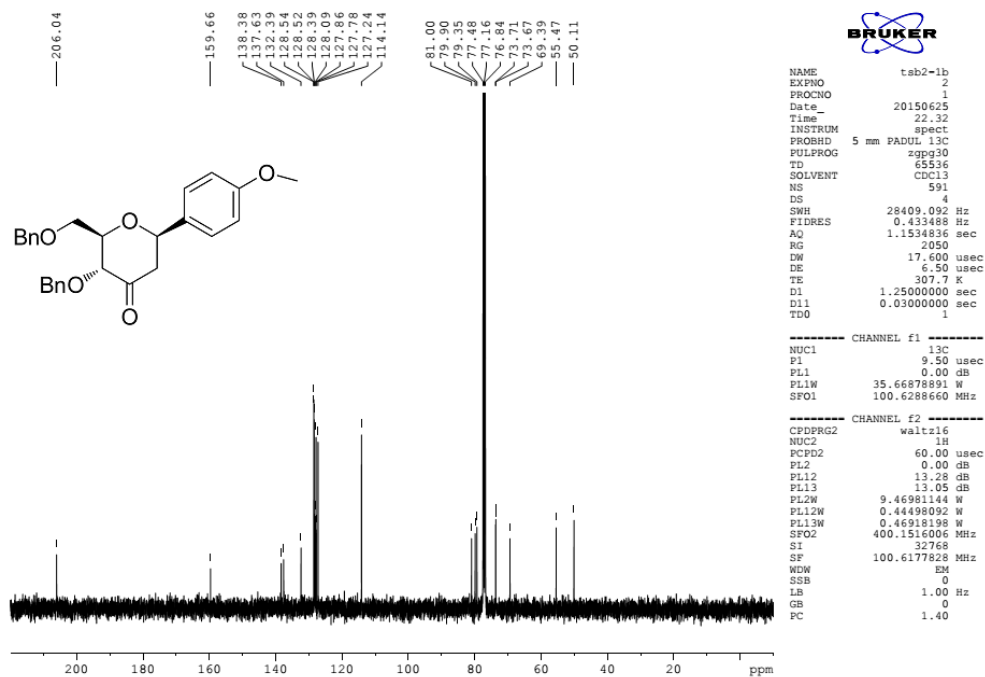

<sup>1</sup>H NMR spectrum of **4bβ**, 400MHz, CDCl<sub>3</sub>

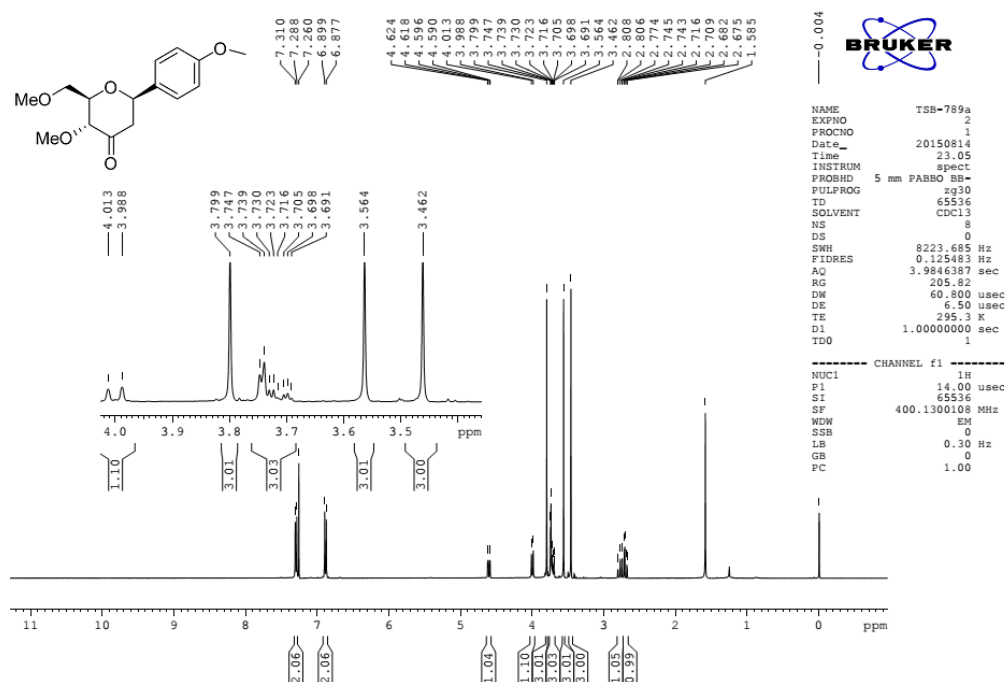

<sup>13</sup>C NMR spectrum of **4bβ**, 100MHz, CDCl<sub>3</sub>

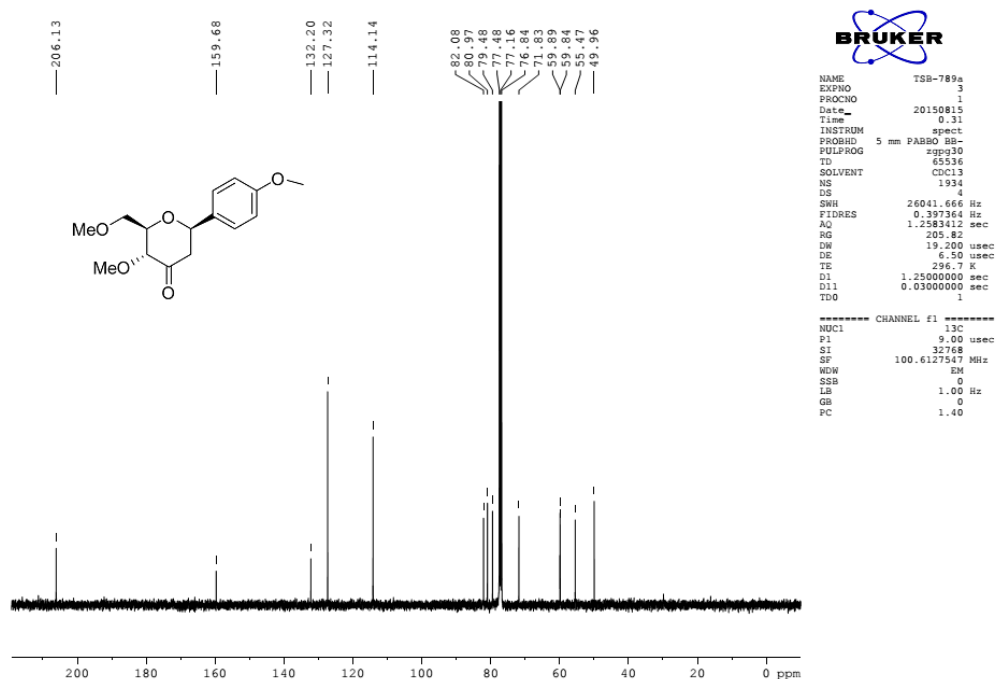

$^1\text{H}$  NMR spectrum of **4c $\beta$** , 400MHz,  $\text{CDCl}_3$

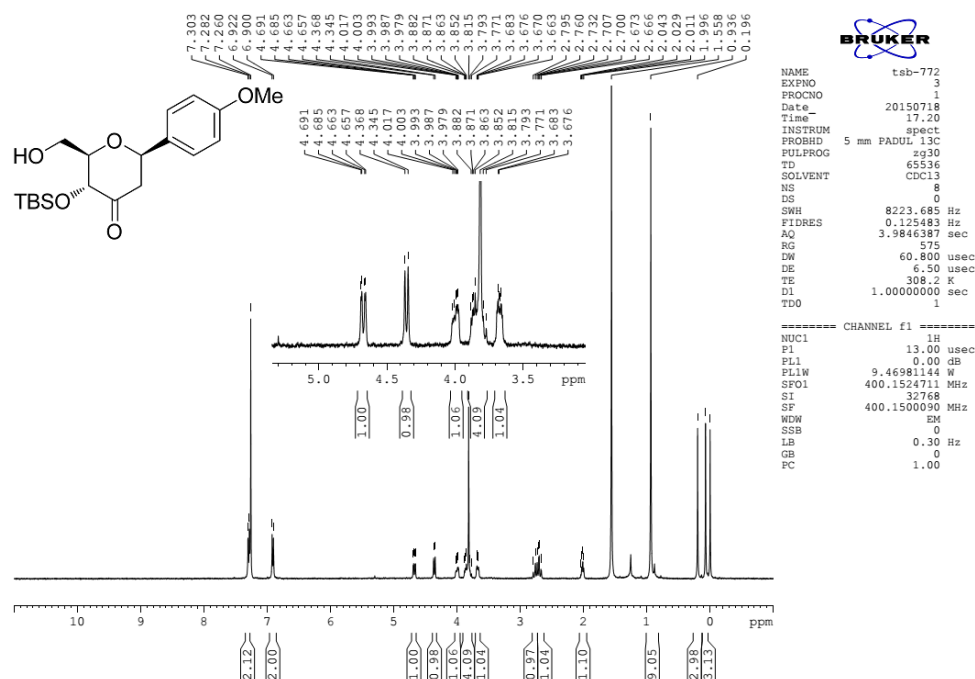

$^{13}\text{C}$  NMR spectrum of **4c $\beta$** , 100MHz,  $\text{CDCl}_3$

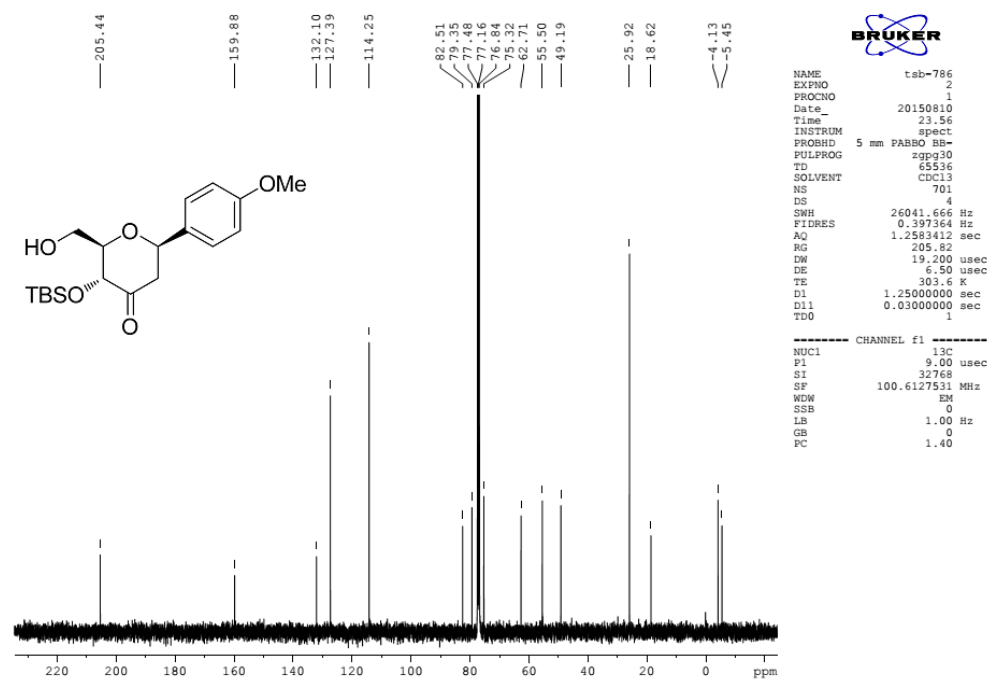

$^1\text{H}$  NMR spectrum of **4d $\beta$** , 400MHz,  $\text{CDCl}_3$

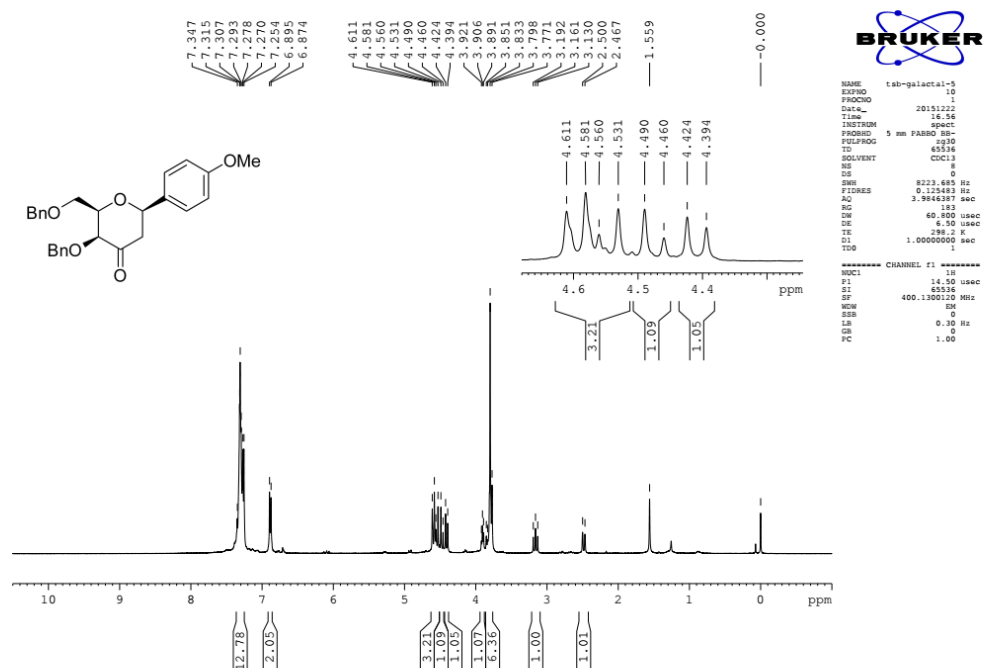

$^{13}\text{C}$  NMR spectrum of **4d $\beta$** , 100MHz,  $\text{CDCl}_3$

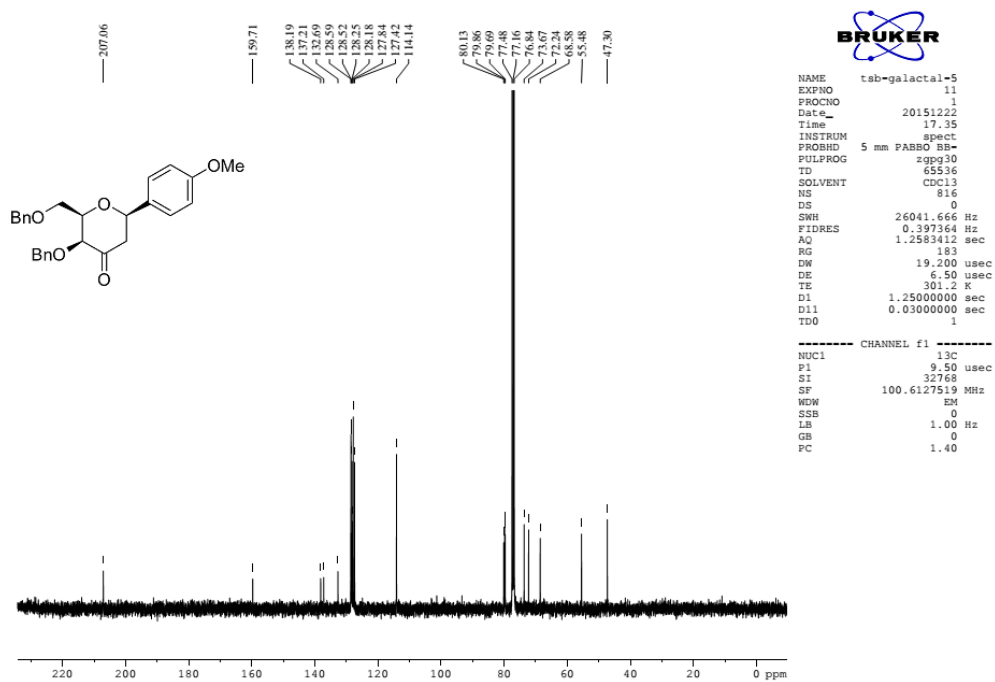

<sup>1</sup>H NMR spectrum of **4eβ**, 400MHz, CDCl<sub>3</sub>

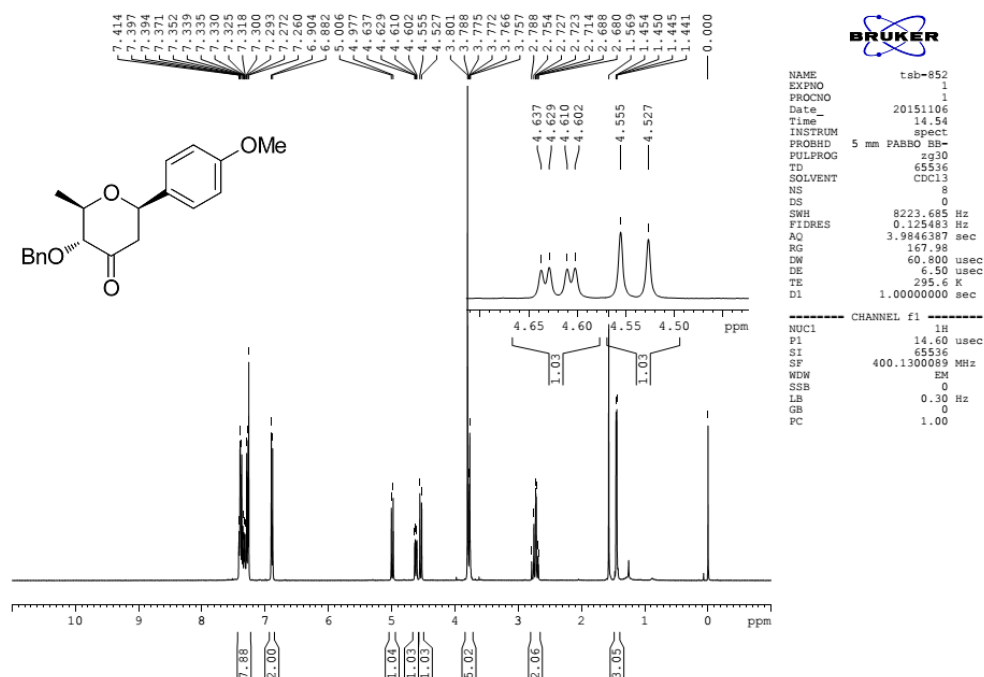

<sup>13</sup>C NMR spectrum of **4eβ**, 100MHz, CDCl<sub>3</sub>

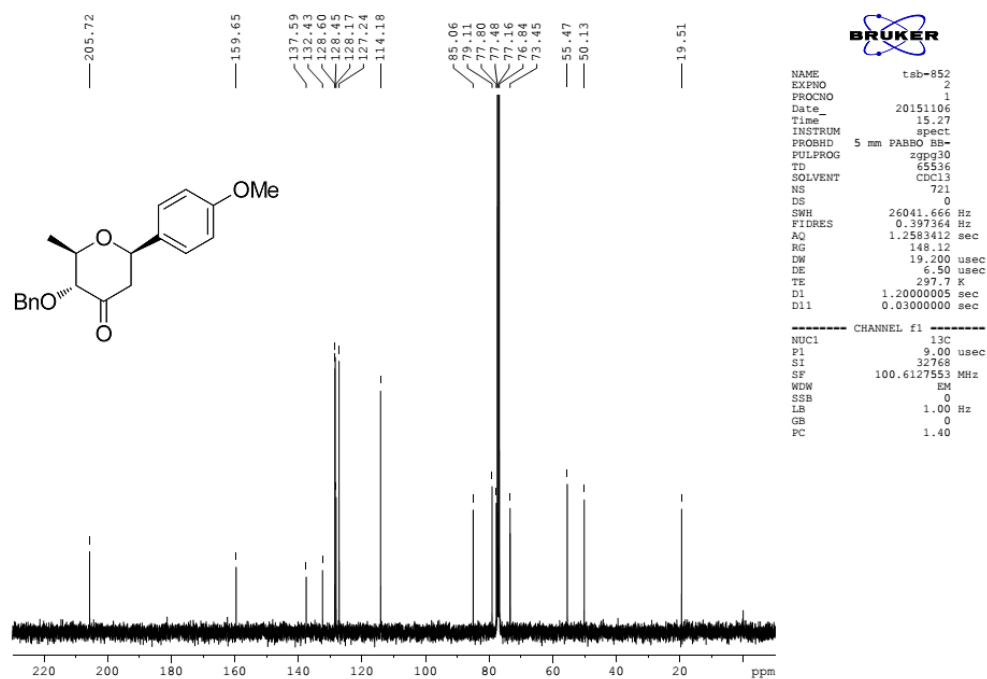



$^1\text{H}$  NMR spectrum of **4fß**, 400MHz,  $\text{CDCl}_3$

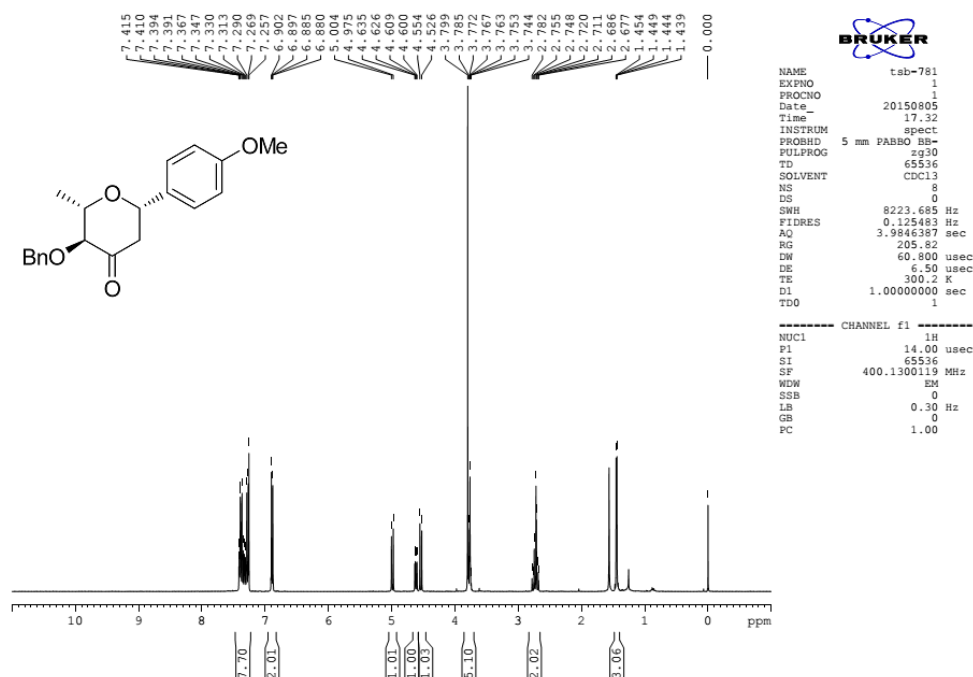

$^{13}\text{C}$  NMR spectrum of **4fß**, 100MHz,  $\text{CDCl}_3$

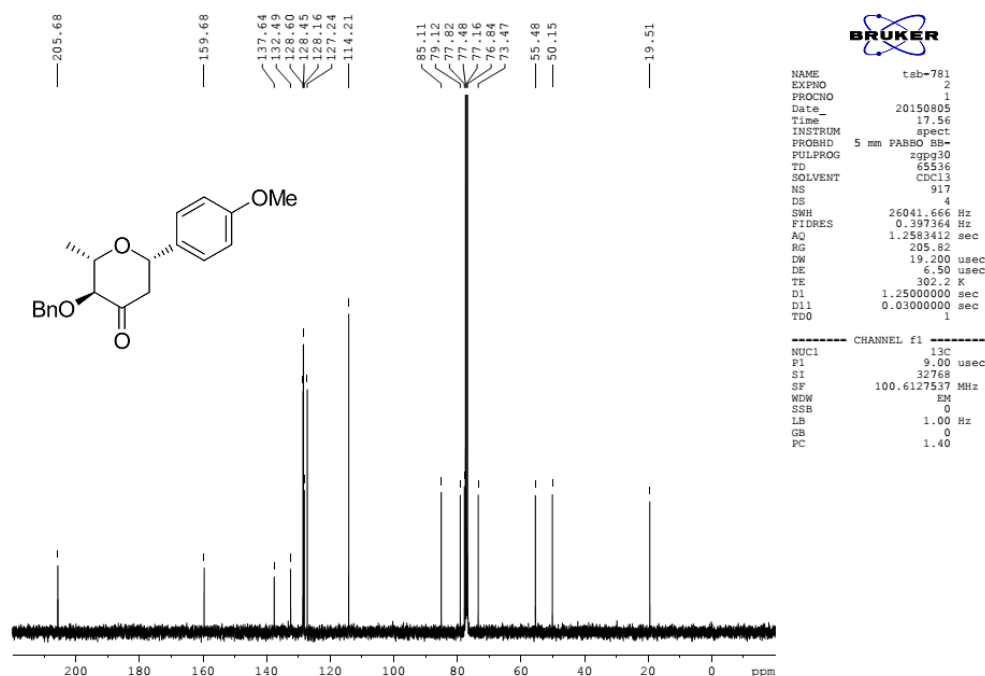

$^1\text{H}$  NMR spectrum of **4h $\beta$** , 400MHz,  $\text{CDCl}_3$

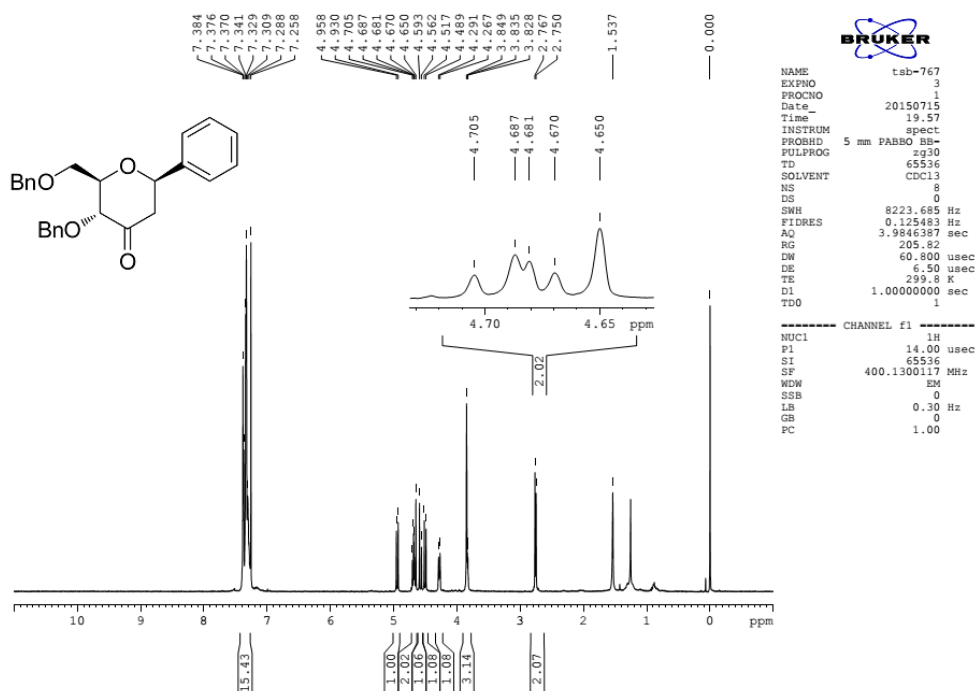

$^{13}\text{C}$  NMR spectrum of **4h $\beta$** , 100MHz,  $\text{CDCl}_3$

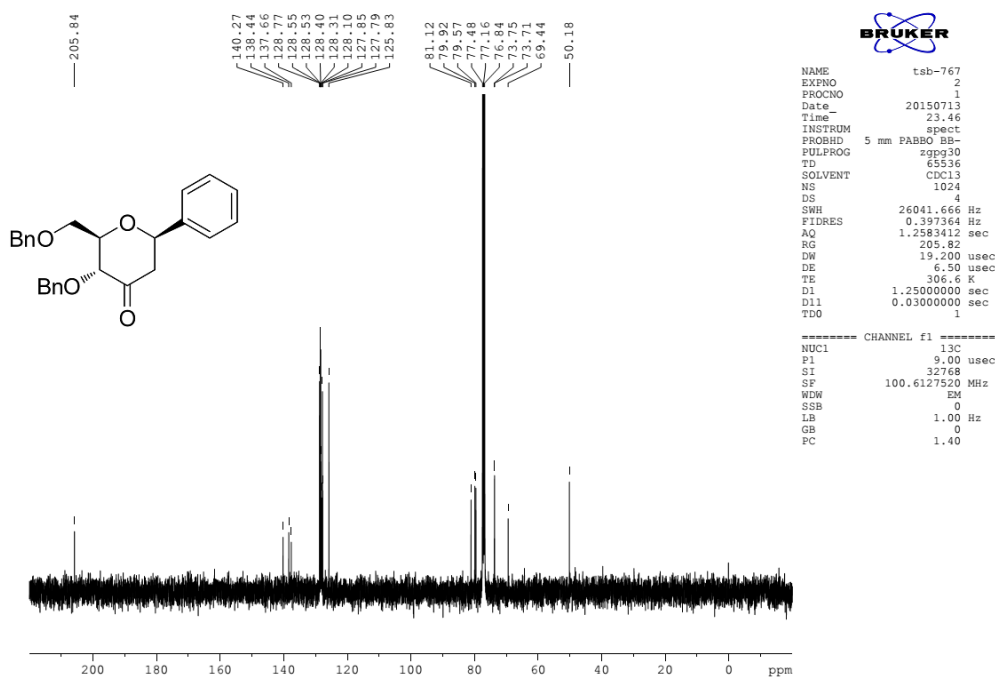

<sup>1</sup>H NMR spectrum of **4iβ**, 400MHz, CDCl<sub>3</sub>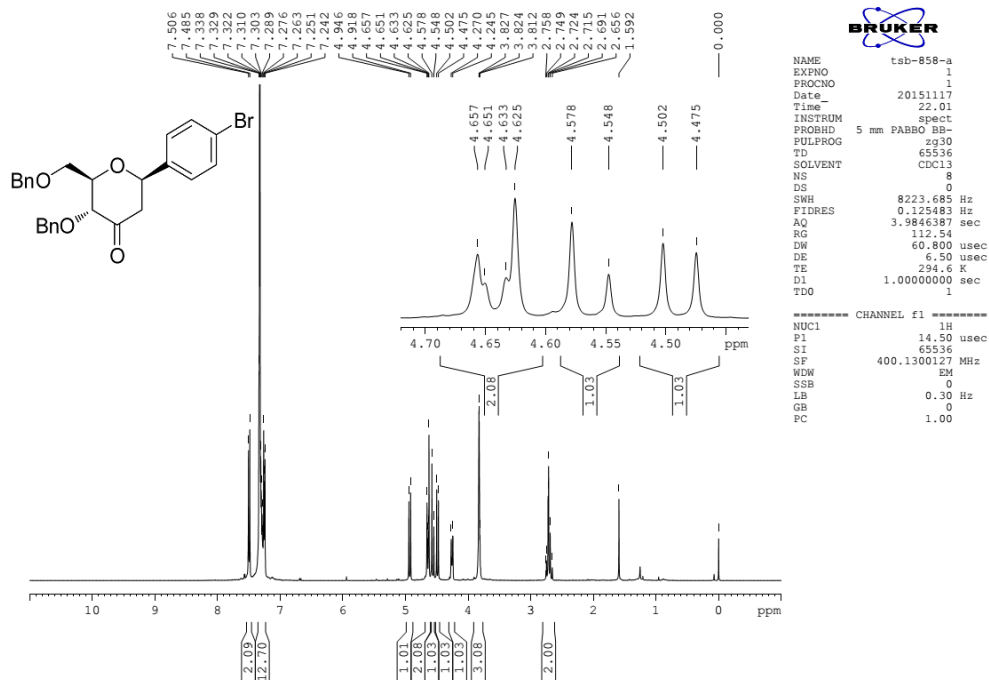

<sup>13</sup>C NMR spectrum of **4iβ**, 100MHz, CDCl<sub>3</sub>

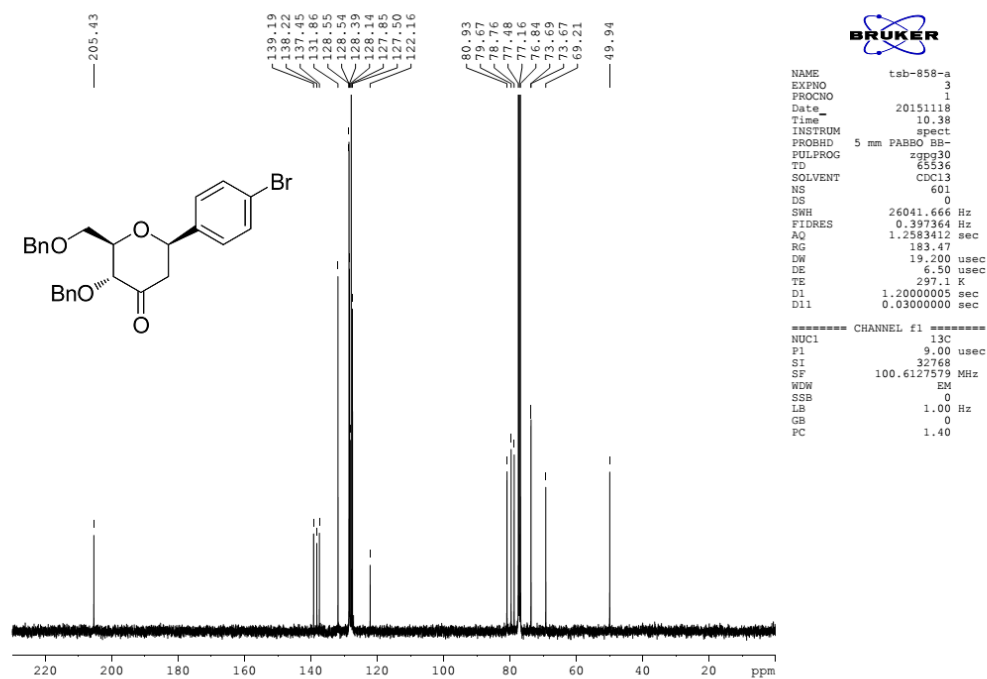

$^1\text{H}$  NMR spectrum of **4j $\beta$** , 400MHz,  $\text{CDCl}_3$

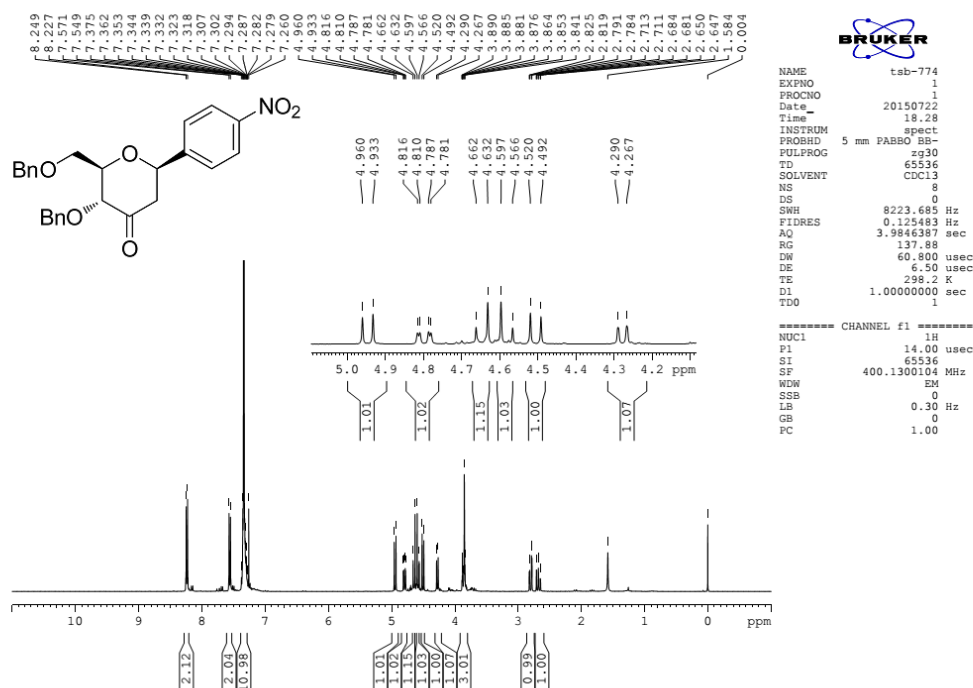

$^{13}\text{C}$  NMR spectrum of **4j $\beta$** , 100MHz,  $\text{CDCl}_3$

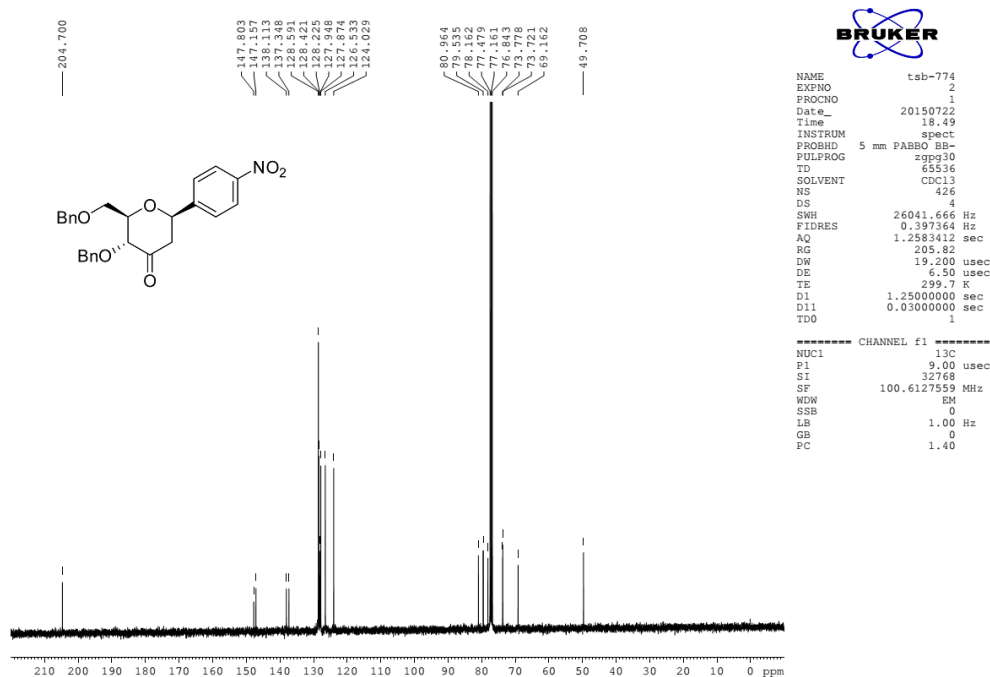

<sup>1</sup>H NMR spectrum of **4kβ**, 400MHz, CDCl<sub>3</sub>

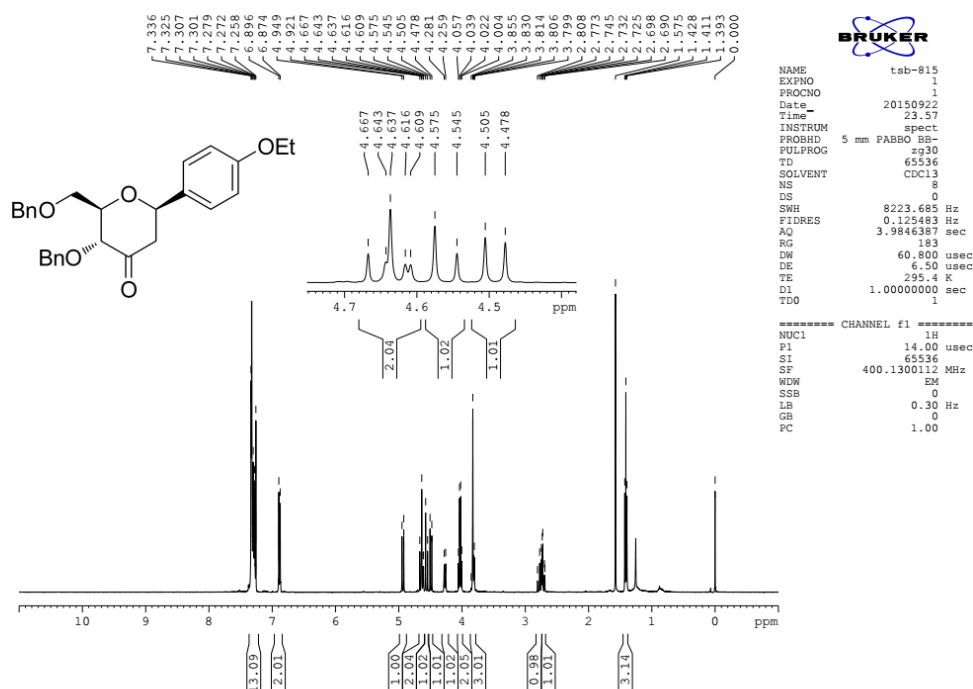

<sup>13</sup>C NMR spectrum of **4kβ**, 100MHz, CDCl<sub>3</sub>

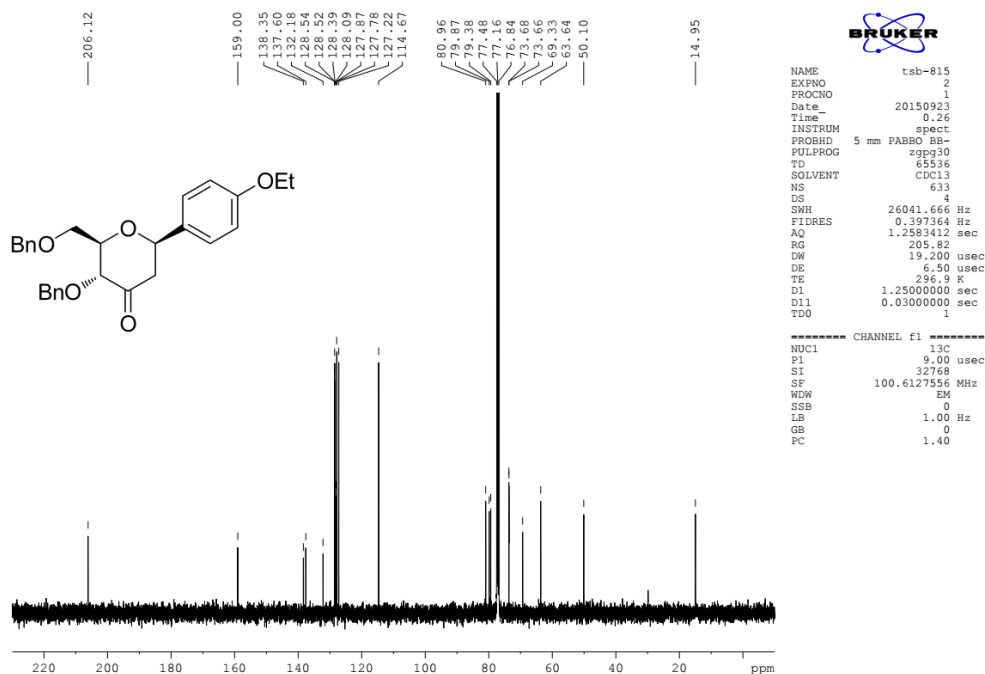

<sup>1</sup>H NMR spectrum of **41β**, 400MHz, CDCl<sub>3</sub>

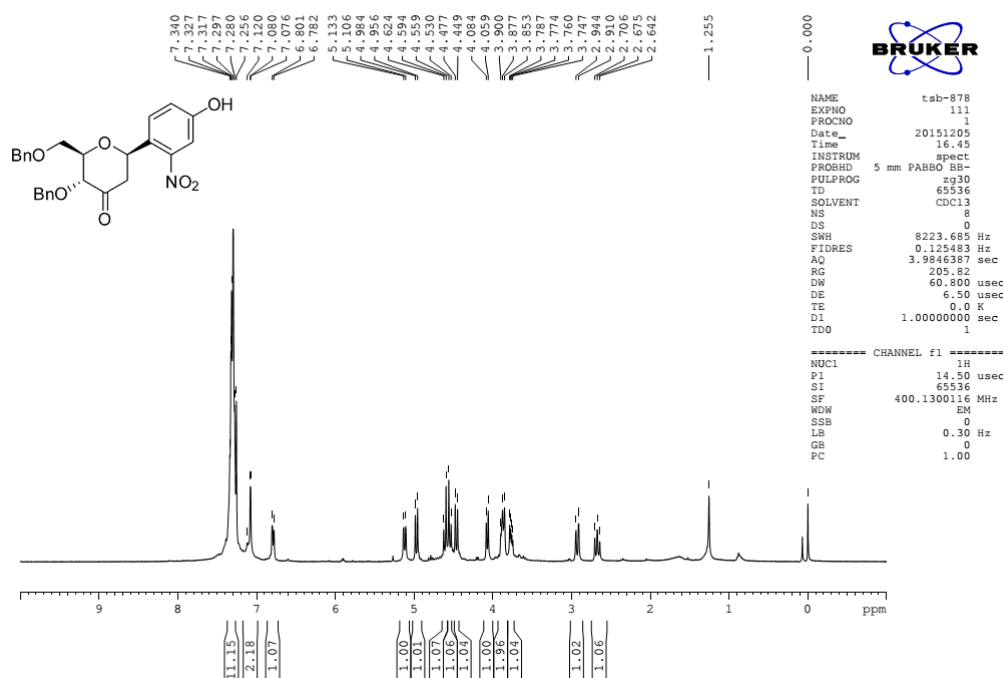

<sup>13</sup>C NMR spectrum of **41β**, 100MHz, CDCl<sub>3</sub>

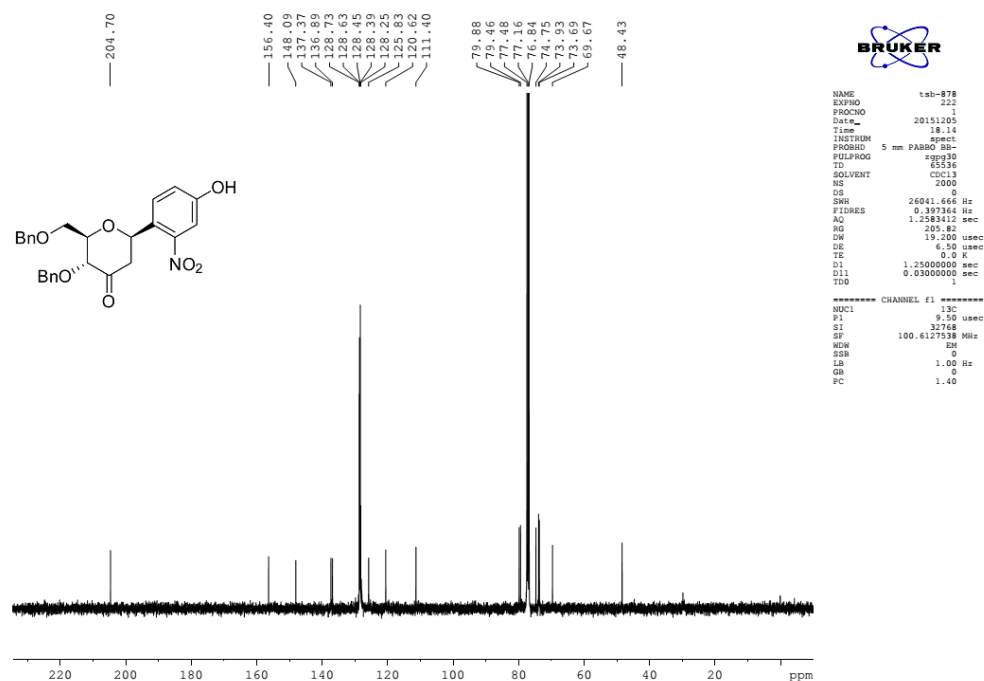

<sup>1</sup>H NMR spectrum of **4mβ**, 400MHz, CDCl<sub>3</sub>

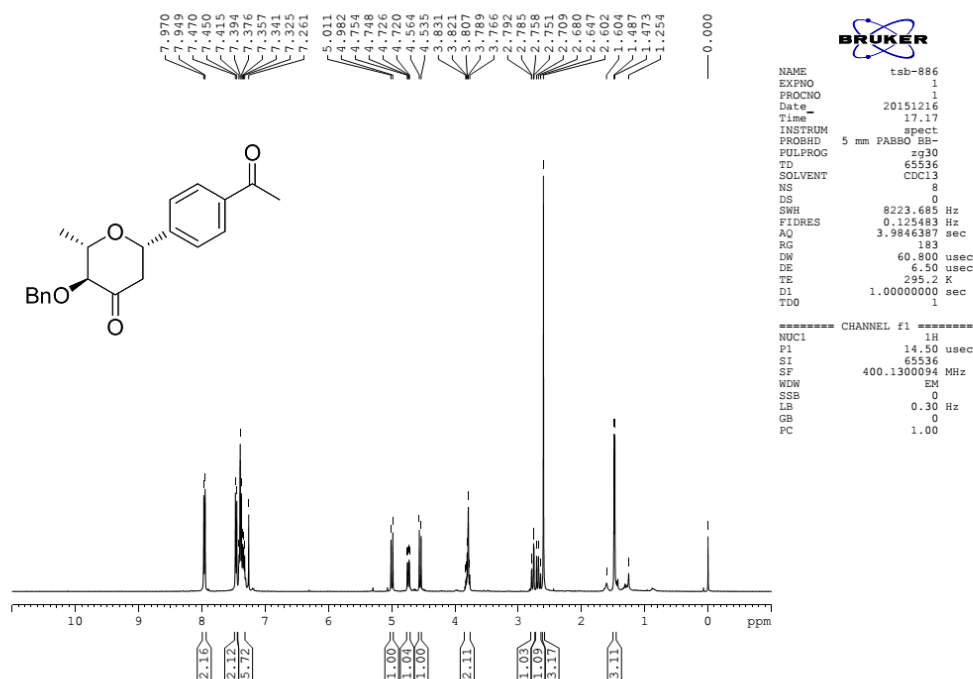

<sup>13</sup>C NMR spectrum of **4mβ**, 100MHz, CDCl<sub>3</sub>

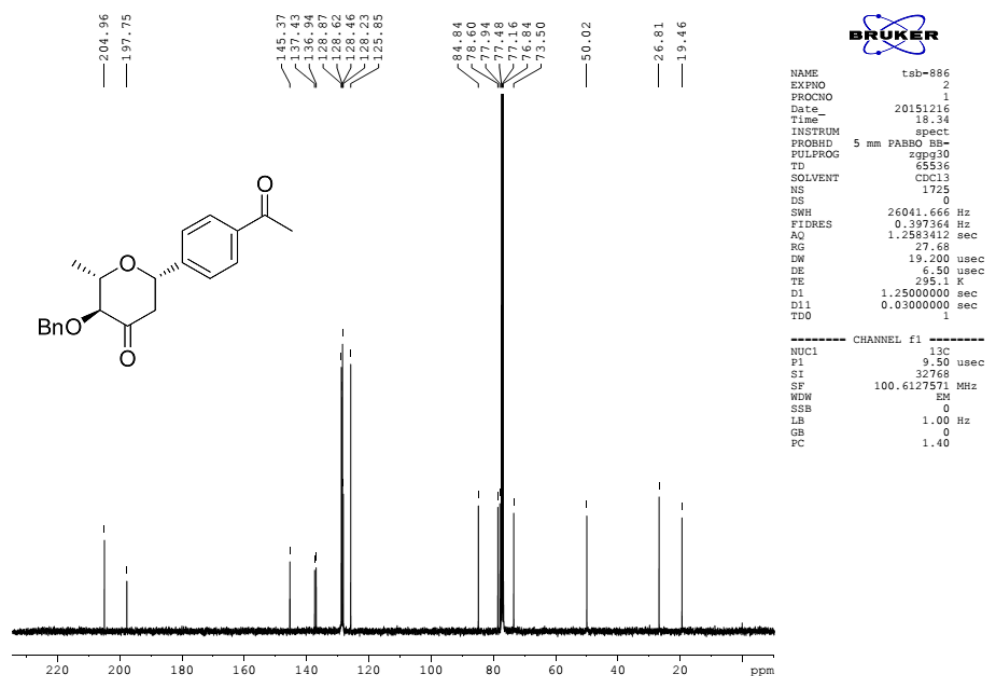

<sup>1</sup>H NMR spectrum of **4nβ**, 400MHz, CDCl<sub>3</sub>

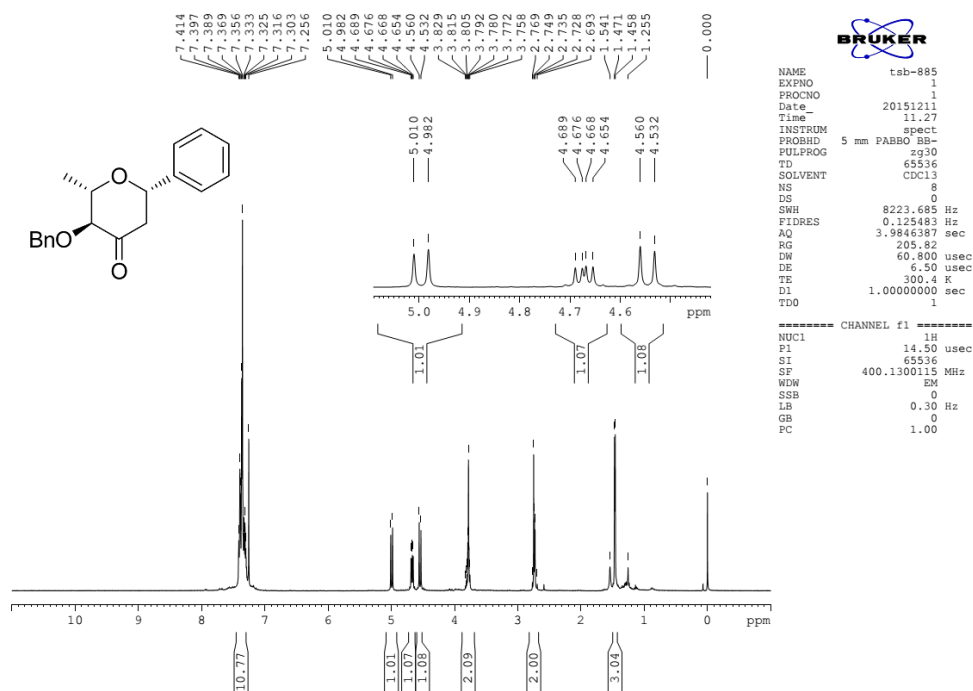

<sup>13</sup>C NMR spectrum of **4nβ**, 100MHz, CDCl<sub>3</sub>

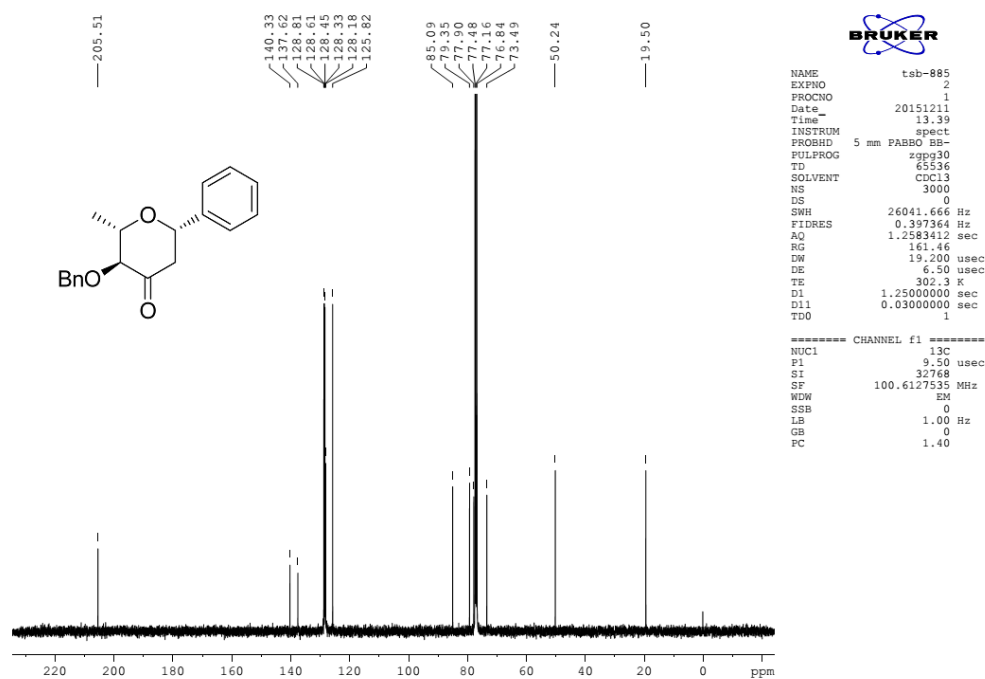



$^1\text{H}$  NMR spectrum of **4o $\beta$** , 400MHz,  $\text{CDCl}_3$

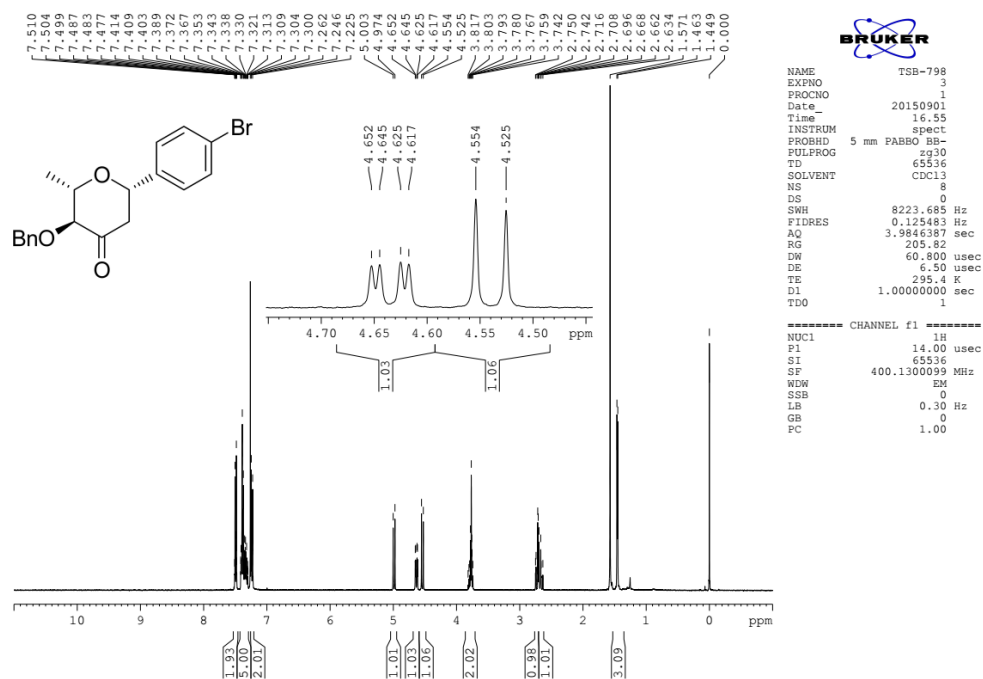

$^{13}\text{C}$  NMR spectrum of **4o $\beta$** , 100MHz,  $\text{CDCl}_3$

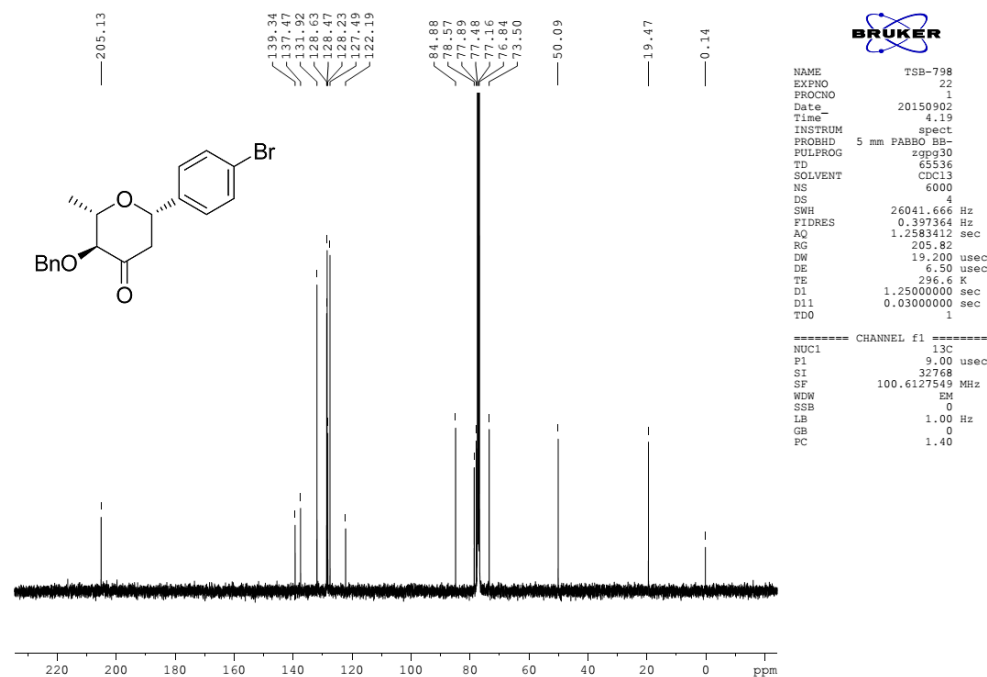

<sup>1</sup>H NMR spectrum of **4pβ**, 400MHz, CDCl<sub>3</sub>

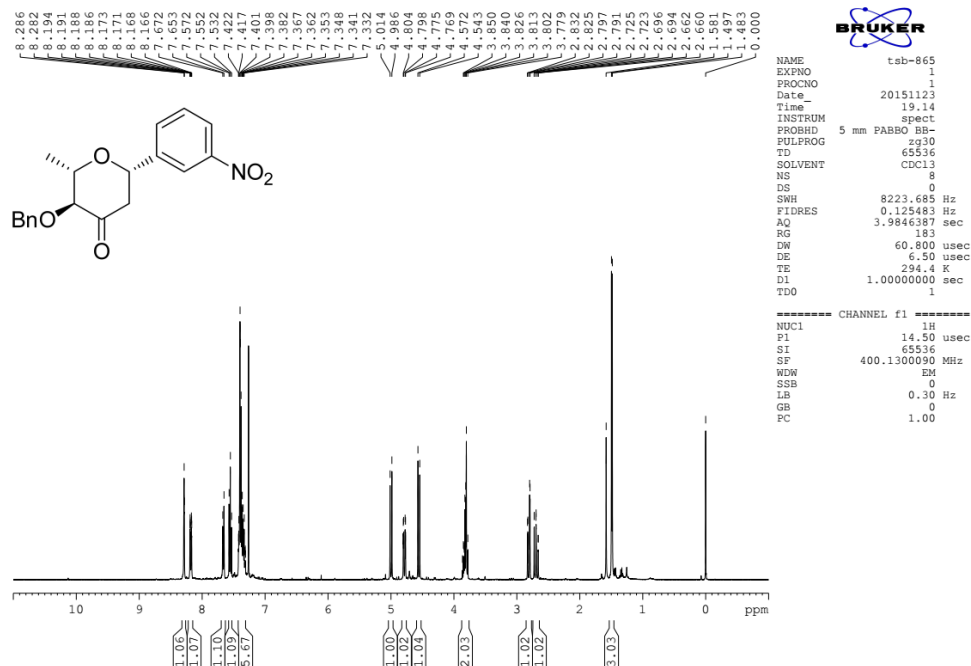

<sup>13</sup>C NMR spectrum of **4pβ**, 100MHz, CDCl<sub>3</sub>

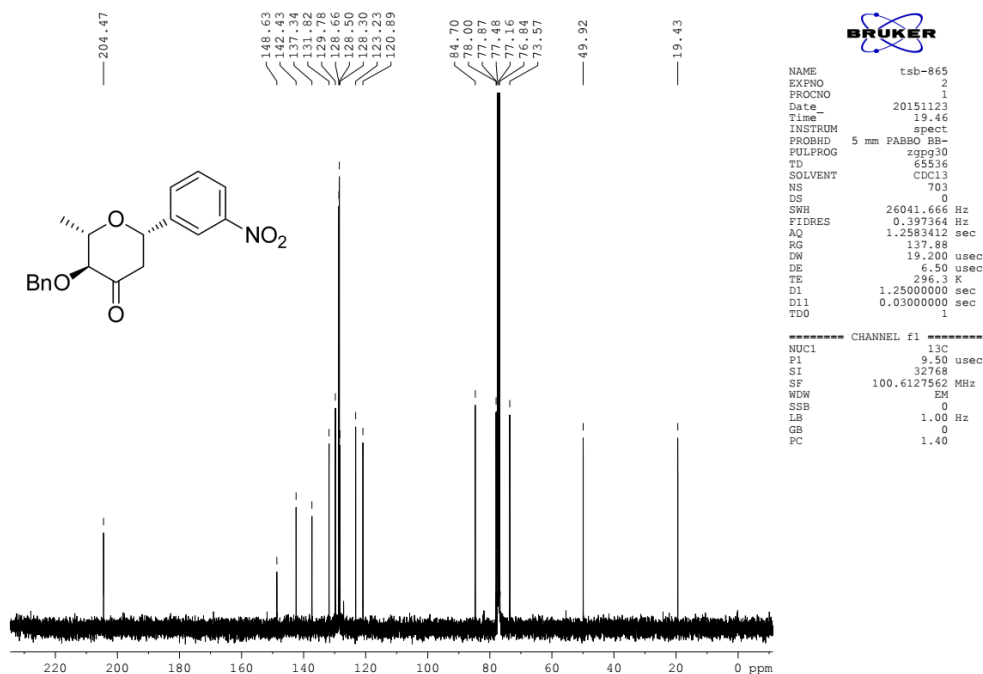

<sup>1</sup>H NMR spectrum of **4qβ**, 400MHz, CDCl<sub>3</sub>

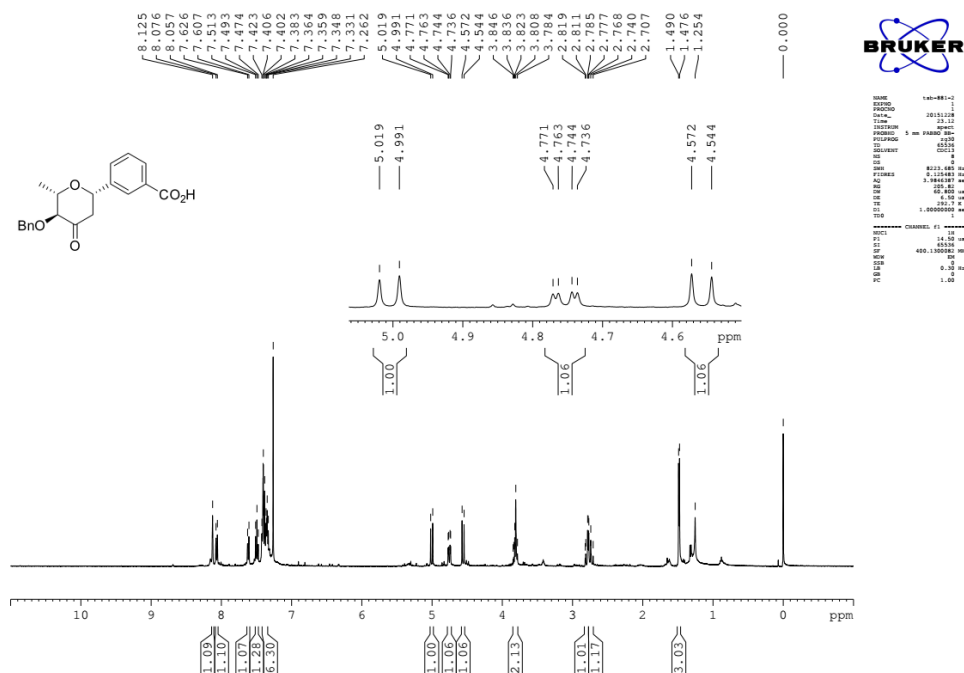

<sup>13</sup>C NMR spectrum of **4qβ**, 100MHz, CDCl<sub>3</sub>

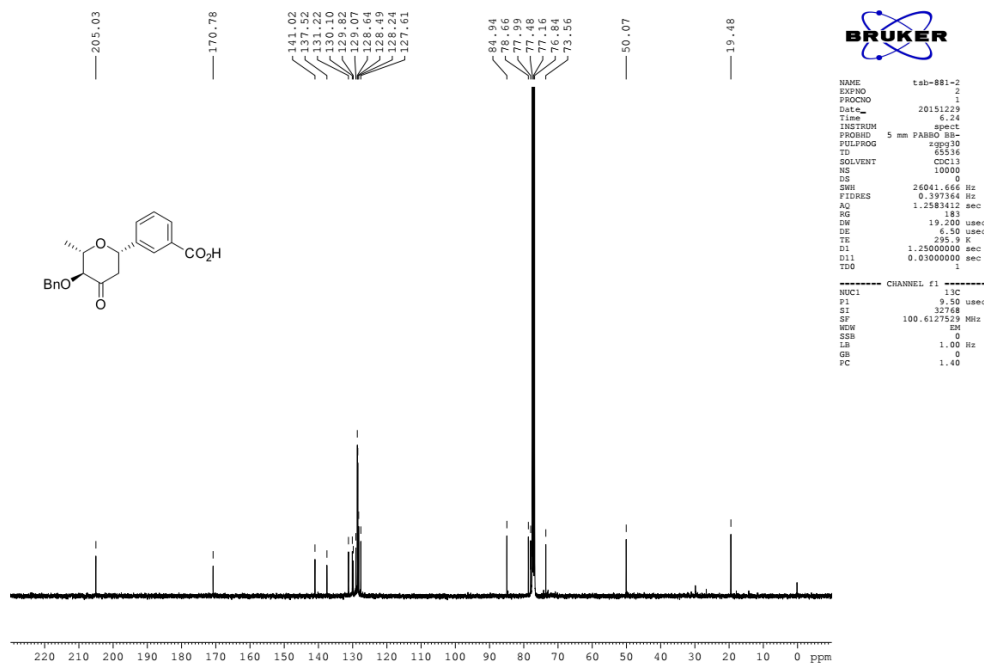

$^1\text{H}$  NMR spectrum of **4r $\beta$** , 400MHz,  $\text{CDCl}_3$

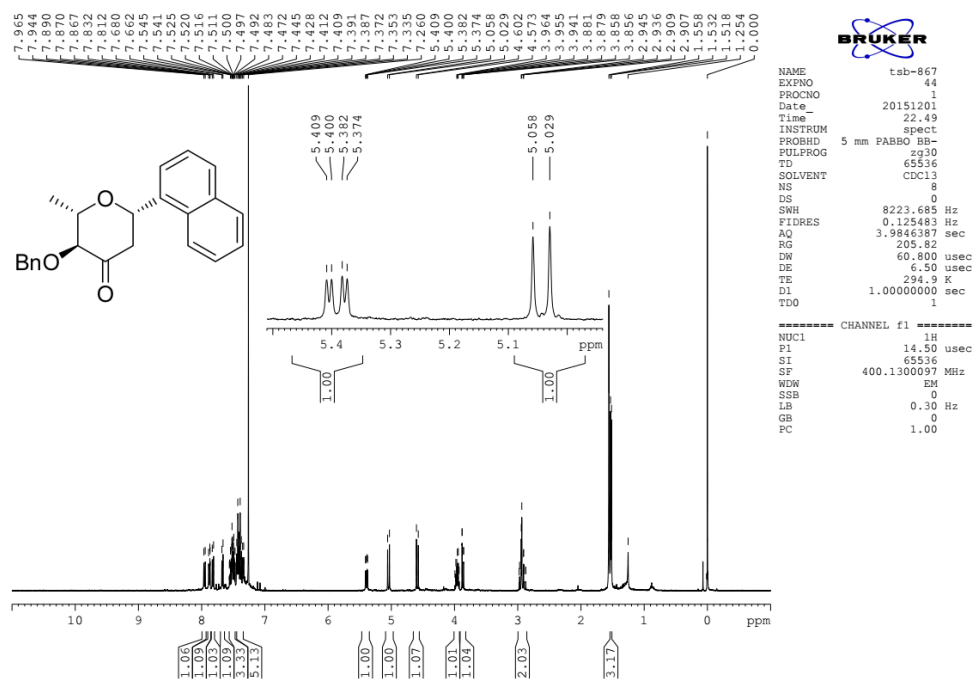

$^{13}\text{C}$  NMR spectrum of **4r $\beta$** , 100MHz,  $\text{CDCl}_3$

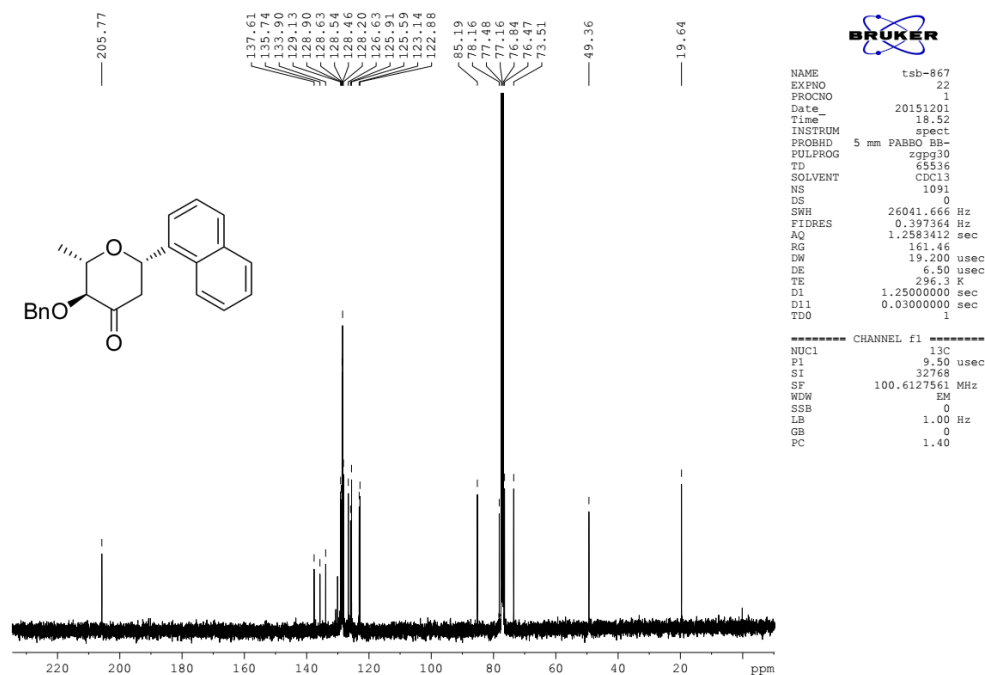

$^1\text{H}$  NMR spectrum of **4s $\beta$** , 400MHz,  $\text{CDCl}_3$

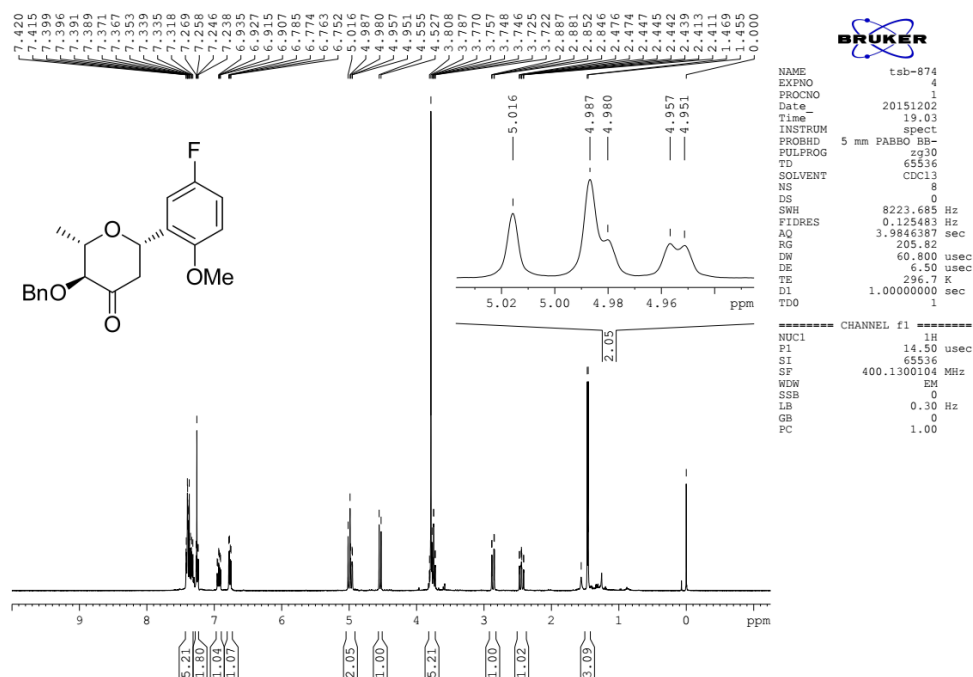

$^{13}\text{C}$  NMR spectrum of **4s $\beta$** , 376MHz,  $\text{CDCl}_3$

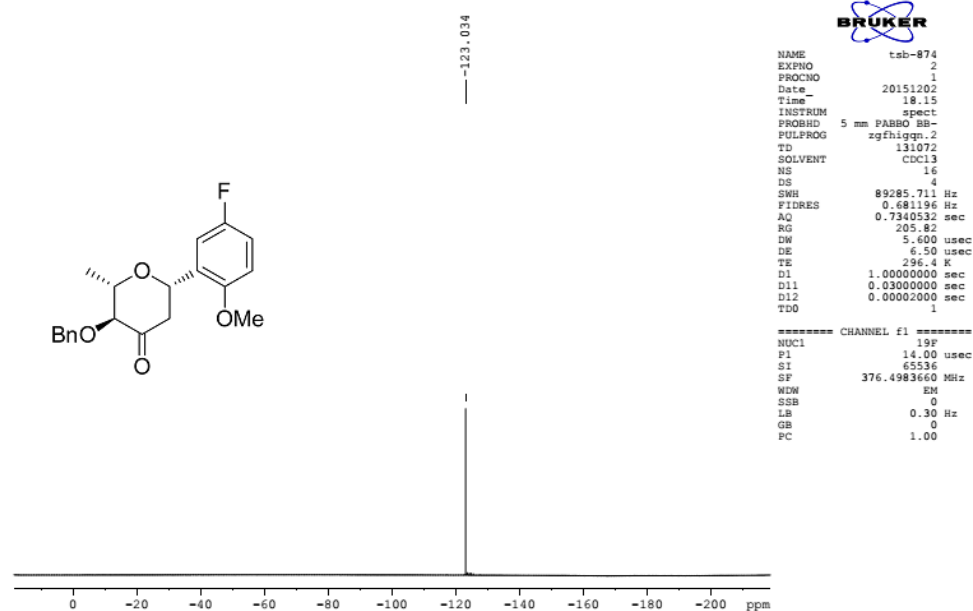

<sup>13</sup>C NMR spectrum of **4sβ**, 100MHz, CDCl<sub>3</sub>

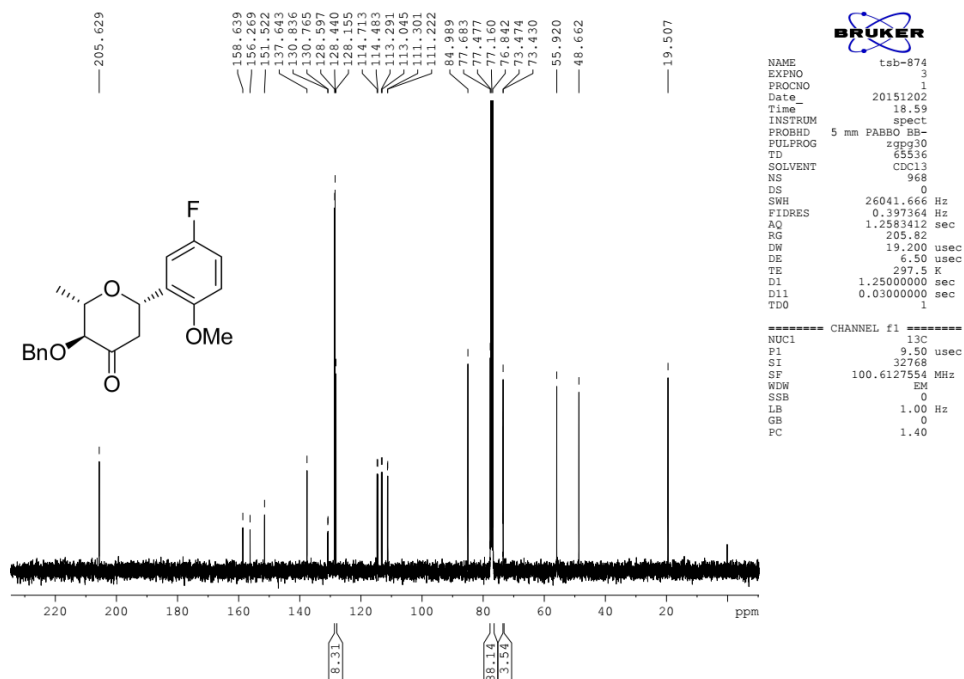

$^1\text{H}$  NMR spectrum of **4t $\beta$** , 400MHz,  $\text{CDCl}_3$

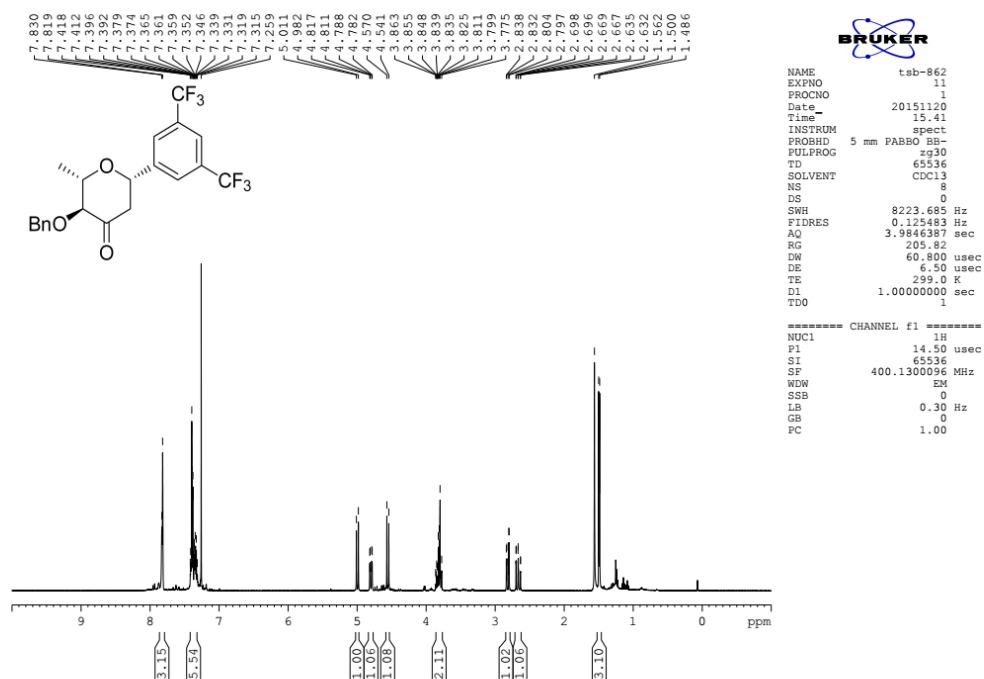

$^{19}\text{F}$  NMR spectrum of **4t $\beta$** , 376MHz,  $\text{CDCl}_3$

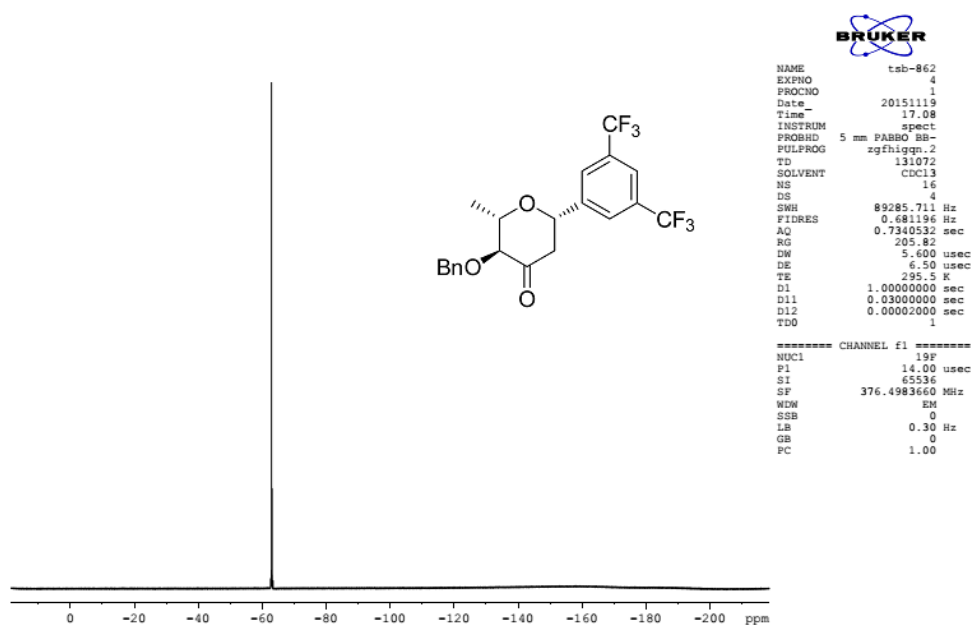

<sup>13</sup>C NMR spectrum of **4tβ**, 100MHz, CDCl<sub>3</sub>

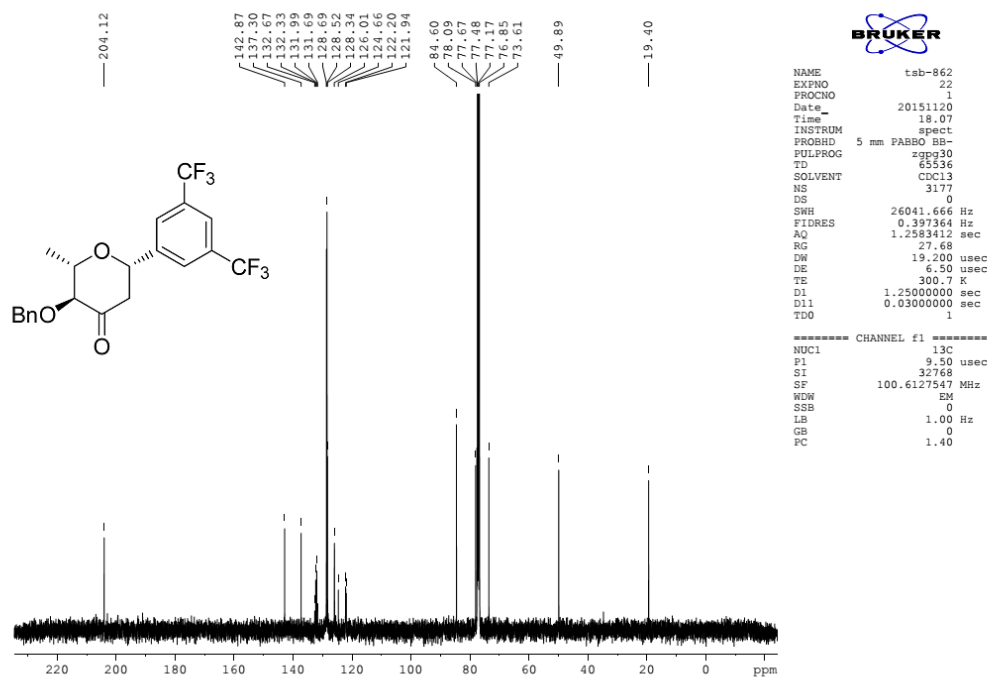



<sup>1</sup>H NMR spectrum of **4uβ**, 400MHz, CDCl<sub>3</sub>

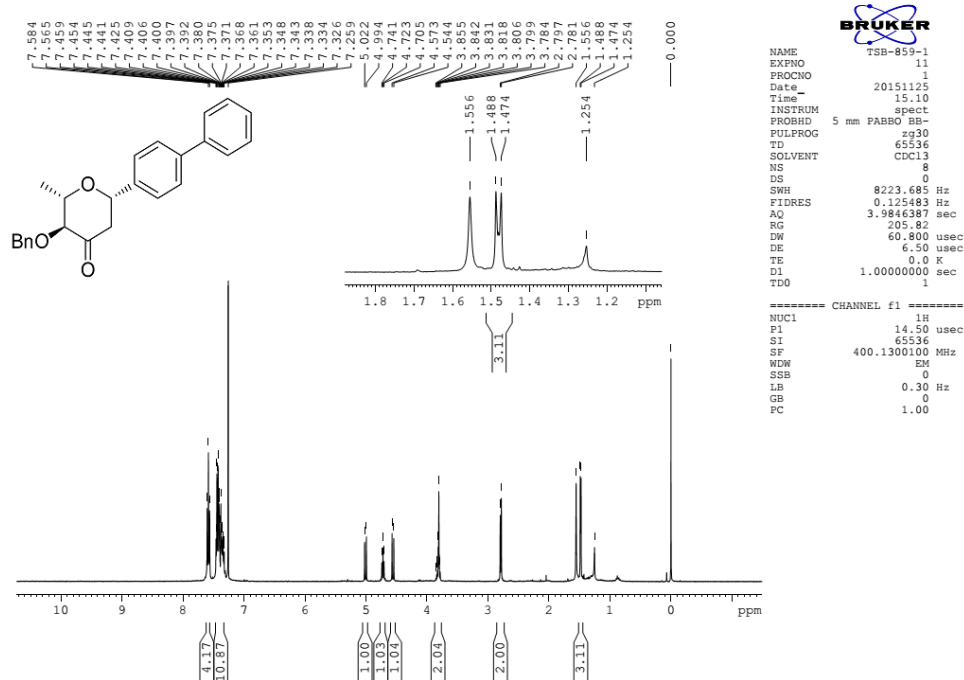

<sup>13</sup>C NMR spectrum of **4uβ**, 100MHz, CDCl<sub>3</sub>

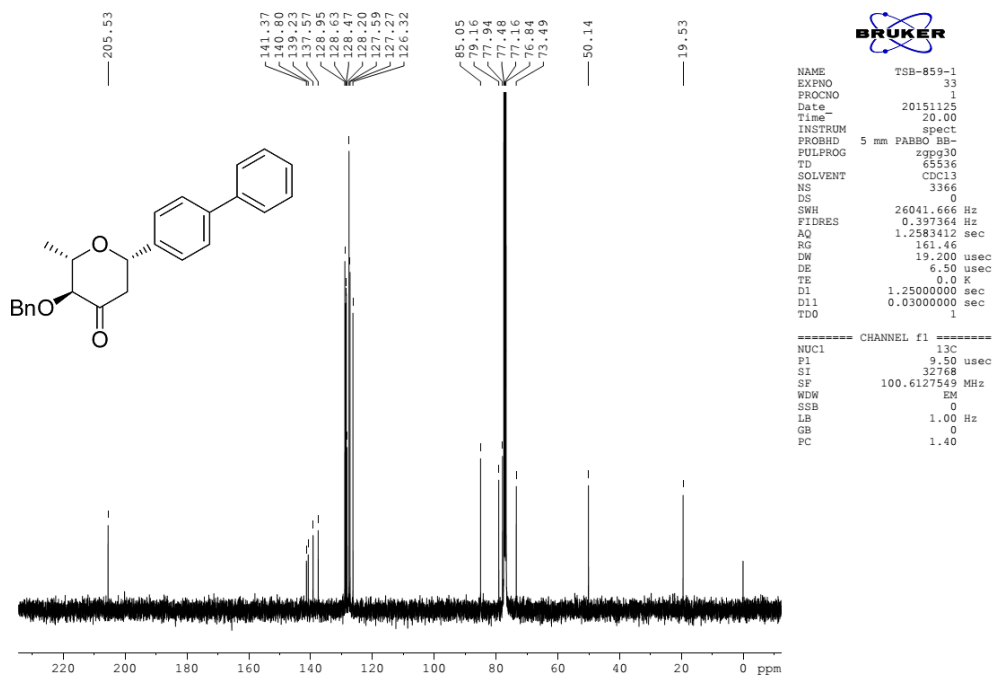

$^1\text{H}$  NMR spectrum of **6**, 400MHz,  $\text{CDCl}_3$

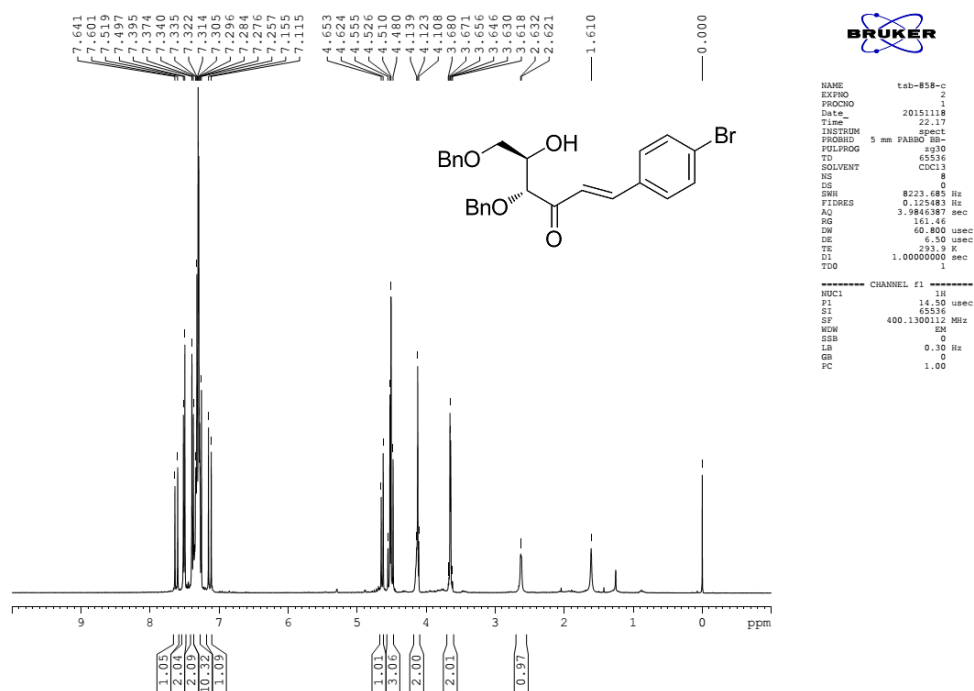

$^{13}\text{C}$  NMR spectrum of **6**, 100MHz,  $\text{CDCl}_3$

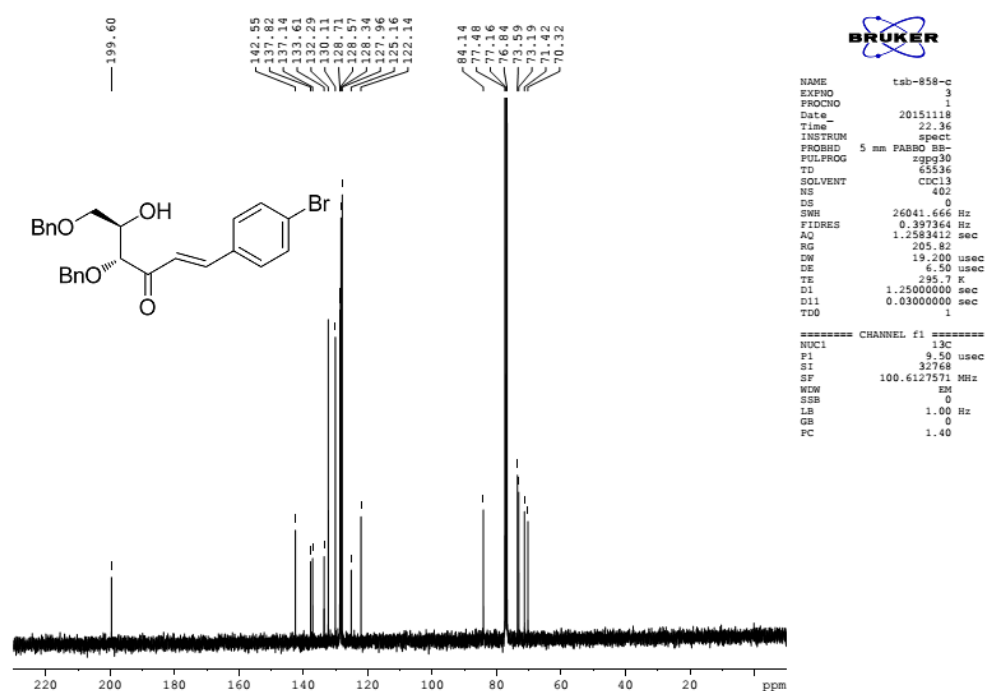

$^1\text{H}$  NMR spectrum of **7**, 400MHz,  $\text{CDCl}_3$

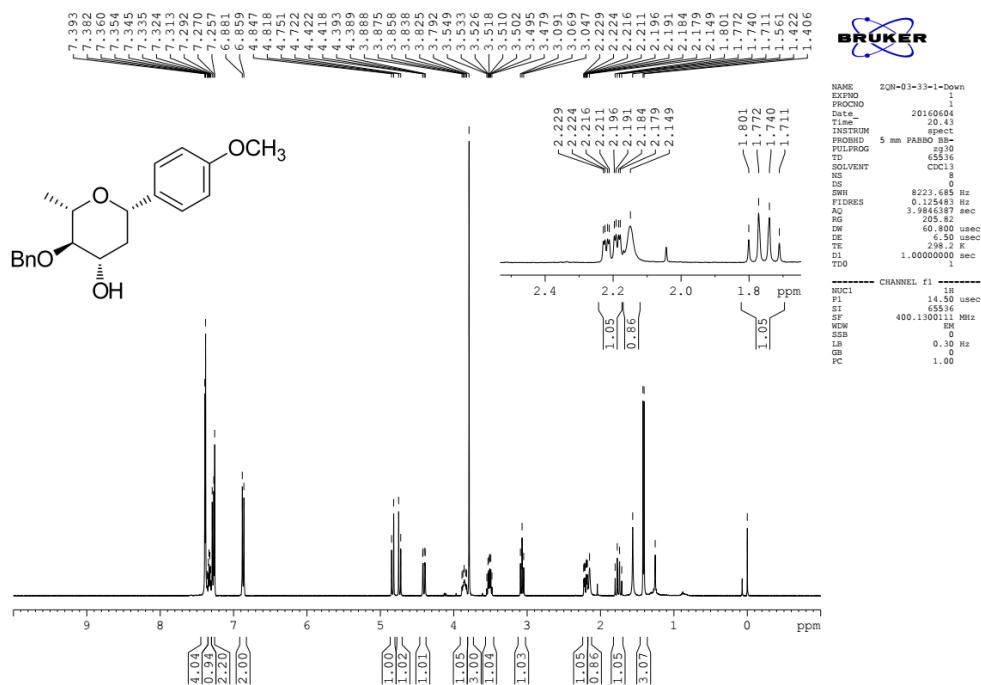

$^{13}\text{C}$  NMR spectrum of **7**, 100MHz,  $\text{CDCl}_3$

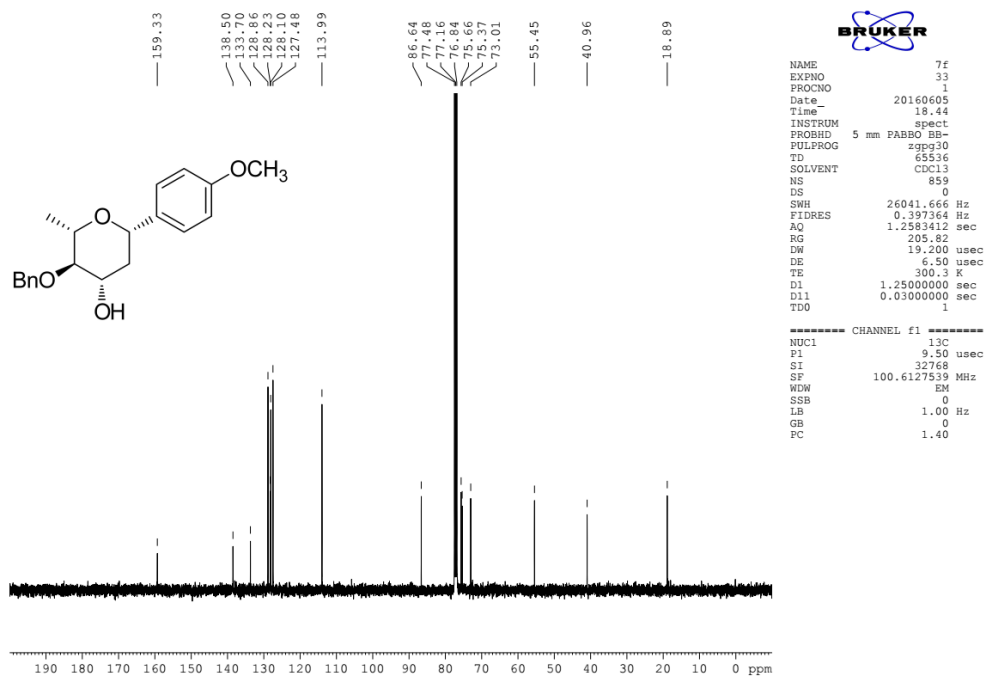

$^1\text{H}$  NMR spectrum of **8**, 400MHz,  $\text{CDCl}_3$

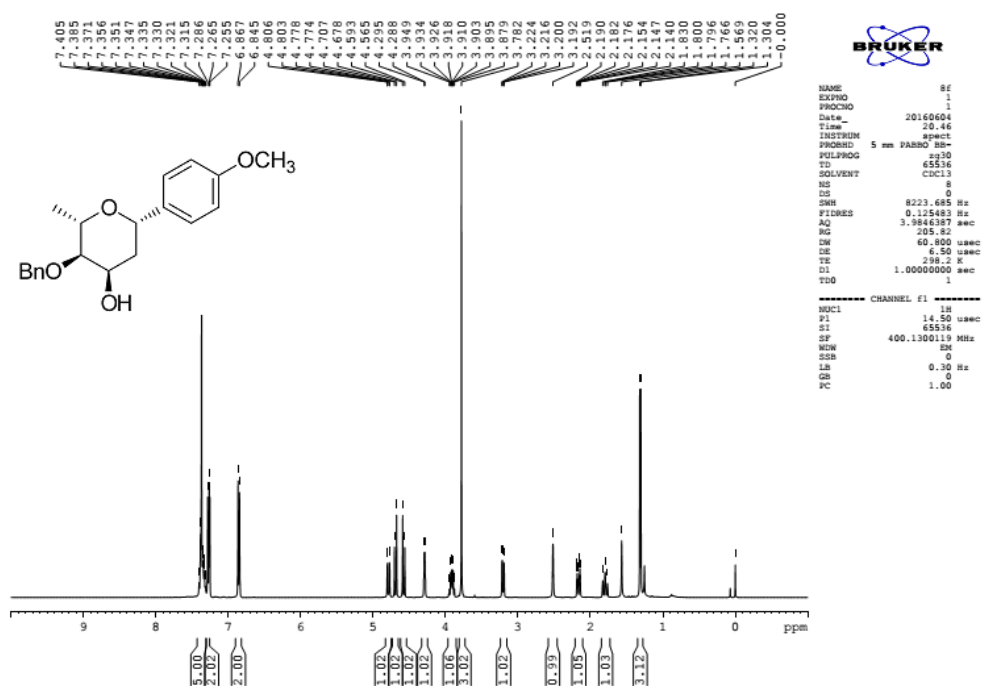

$^{13}\text{C}$  NMR spectrum of **8**, 100MHz,  $\text{CDCl}_3$

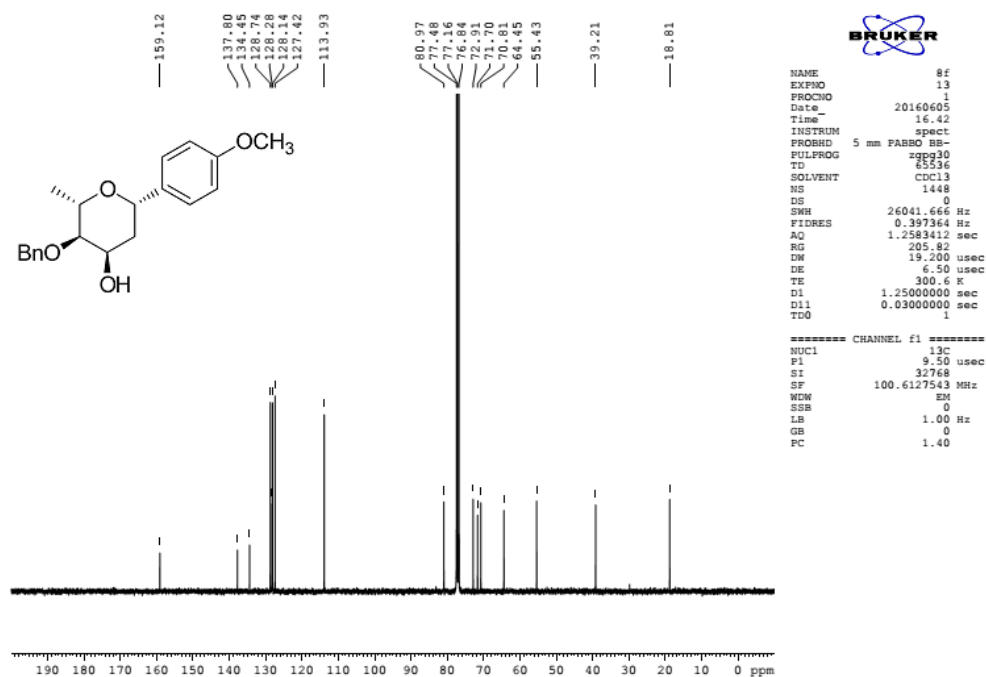

$^1\text{H}$  NMR spectrum of **9**, 400MHz,  $\text{CDCl}_3$

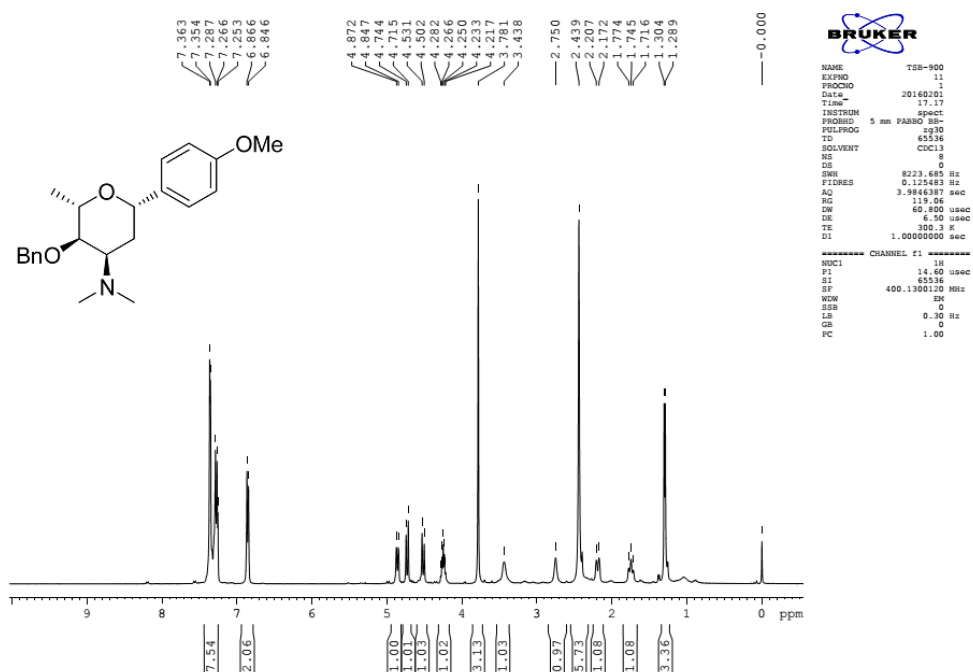

$^{13}\text{C}$  NMR spectrum of **9**, 100MHz,  $\text{CDCl}_3$

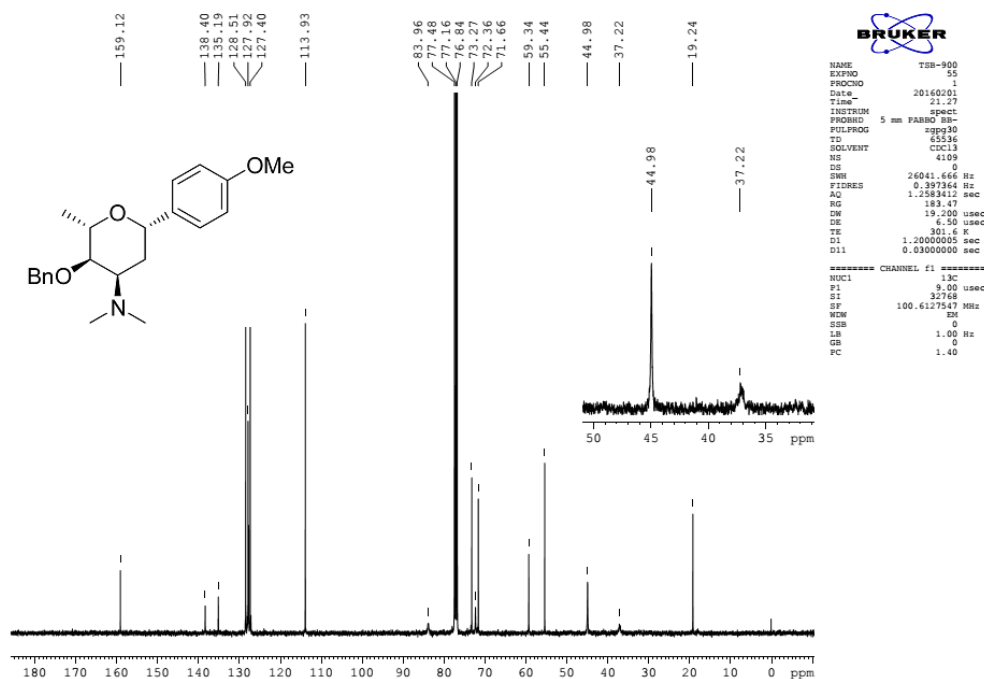

HSQC spectrum of **9**, 100MHz, CDCl<sub>3</sub>

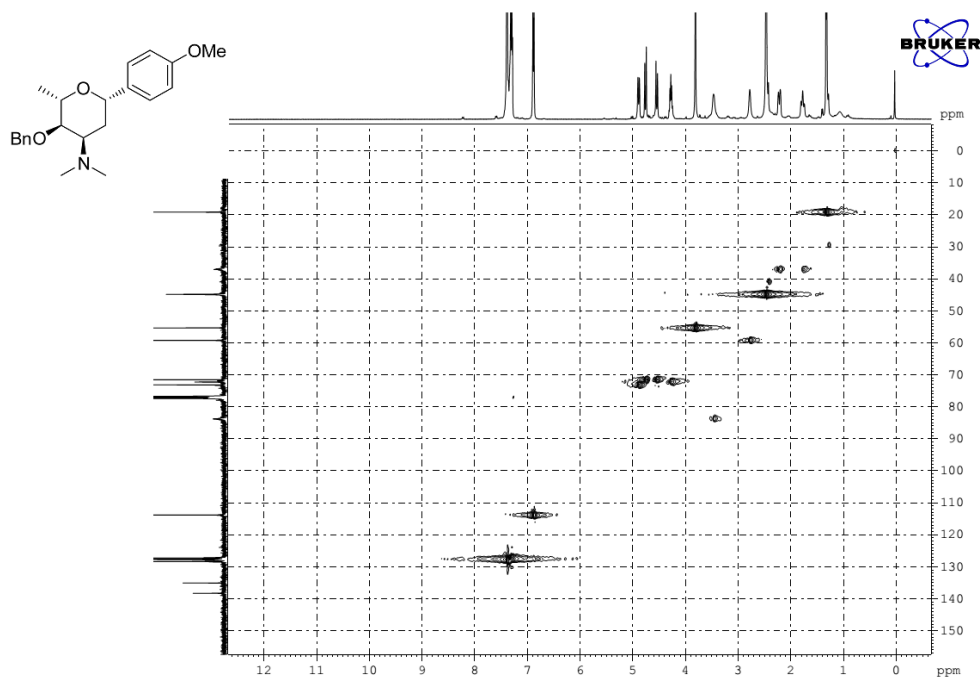

NOE spectrum of **9**, 400MHz, CDCl<sub>3</sub>

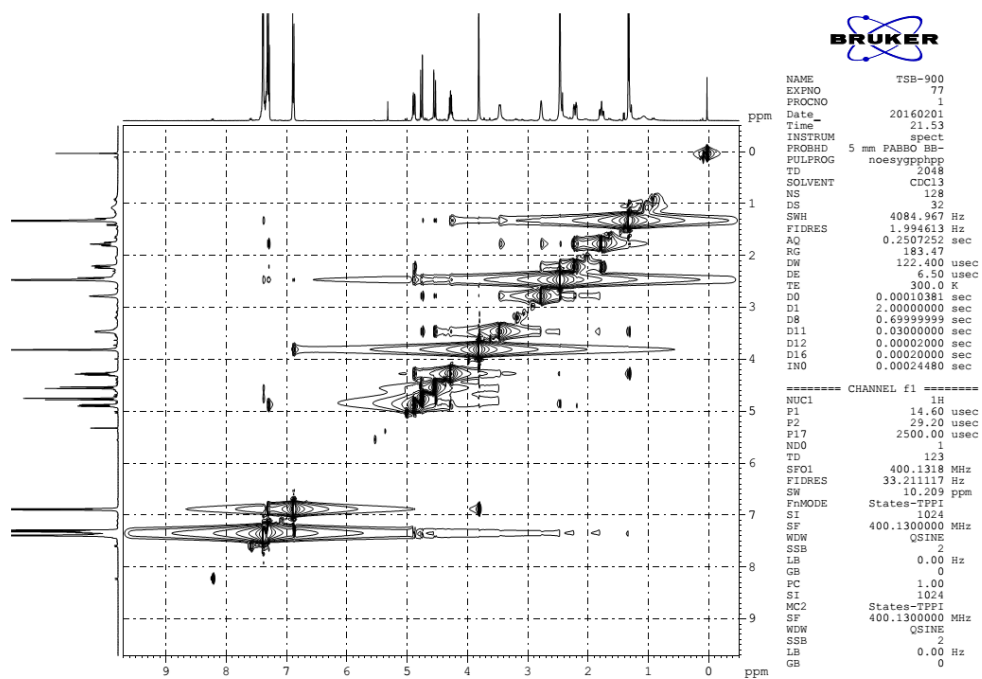

Supplement: Supplementary file 1 [file 11358431]
